# Supplementary material for: The role of highly oxygenated organic molecules in the Boreal aerosol-cloud-climate system
Source: PubMed Central journal article supplement (PMC6761173; doi:10.1038/s41467-019-12338-8), 2019-09-25
Supplement: 41467_2019_12338_MOESM1_ESM.pdf [file 41467_2019_12338_MOESM1_ESM.pdf]

**Supplementary Information for: The role of highly oxygenated organic molecules in the Boreal aerosol-cloud-climate system, by Roldin et al.**

## Supplementary Figures

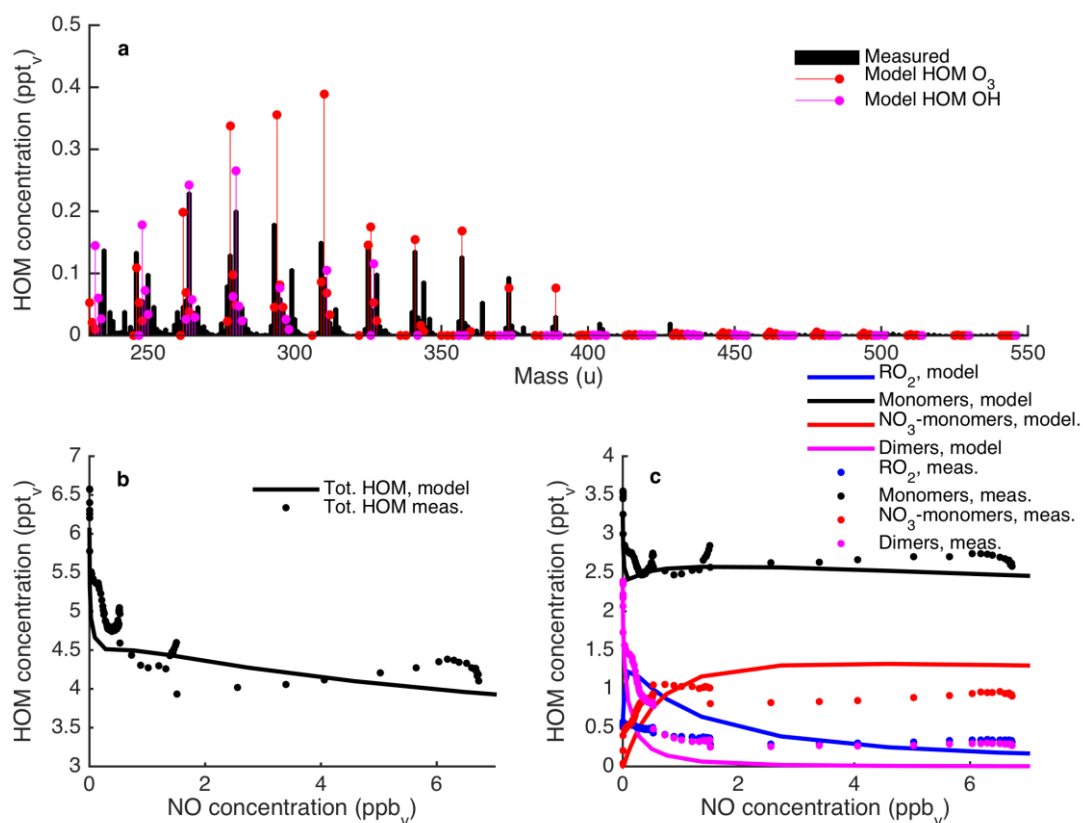

**Supplementary Figure 1.** Modelled and measured HOM concentrations during an  $\alpha$ -pinene ozonolysis experiment in the Jülich Plant Atmosphere Chamber (JPAC) where the NO concentration was gradually increased while the  $\alpha$ -pinene and O<sub>3</sub> concentrations were kept approximately constant at around 6 ppb<sub>v</sub> and 80 ppb<sub>v</sub> respectively. Panel **a** compares the modelled and measured HOM(g) mass spectrum at an NO concentration of  $\sim$ 1.5 ppb<sub>v</sub>, panel **b** shows how the modelled and measured total HOM(g) concentration change when the NO concentration increases and panel **c** shows the modelled and measured concentrations of closed-shell HOM monomers without NO<sub>3</sub> (red), with NO<sub>3</sub> (blue) and dimers (purple). In **a** the modelled HOM mass spectrum is divided into one for the HOM species formed via ozonolysis of  $\alpha$ -pinene and one for OH oxidation of  $\alpha$ -pinene.

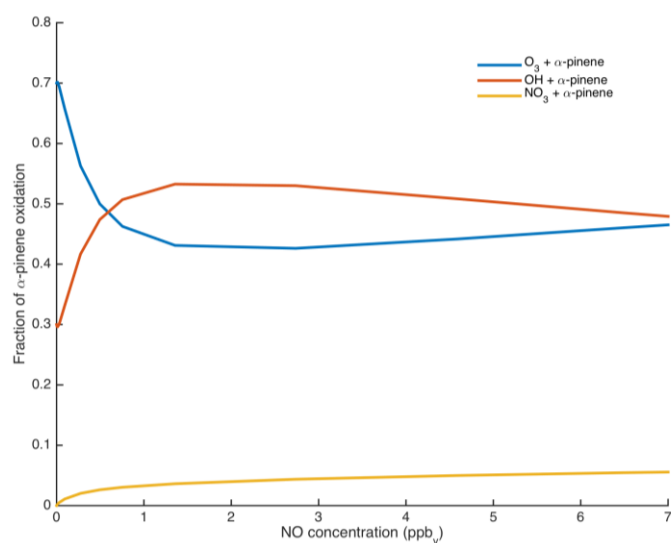

**Supplementary Figure 2.** Modelled fraction of  $\alpha$ -pinene that are oxidized by O<sub>3</sub>, OH and NO<sub>3</sub> at variable NO concentrations in JPAC.

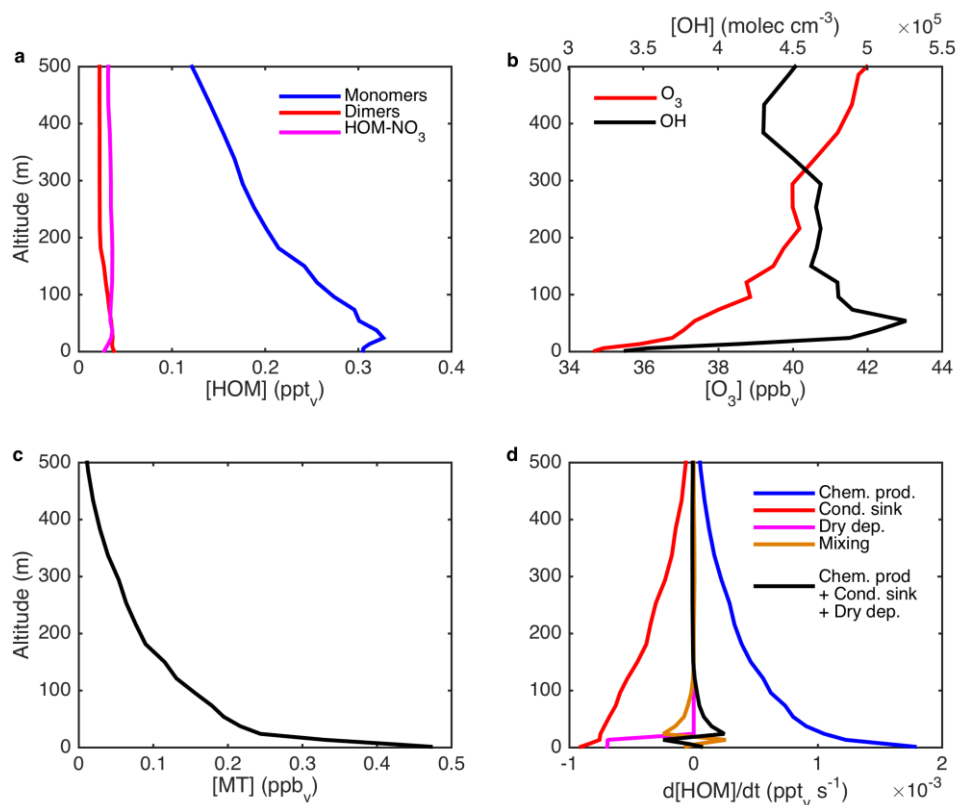

**Supplementary Figure 3.** Modelled median vertical concentration profiles 15<sup>th</sup> to 24<sup>th</sup> of May, 2013 of **a** HOM monomers without NO<sub>3</sub> groups, HOM dimers and HOM monomers with NO<sub>3</sub> groups, **b** O<sub>3</sub> and OH and **c** monoterpenes. Panel **d** shows the HOM chemical production rate, condensation sink, dry deposition loss rate, rate of change due to vertical mixing and the net rate of change due to chemical production, condensation and dry deposition. The generally higher HOM concentration at the top of the canopy than inside the canopy (**a**) causes a net downward flux (mixing) of HOM into the canopy, while above the canopy the net flux of HOM is upward (**d**).

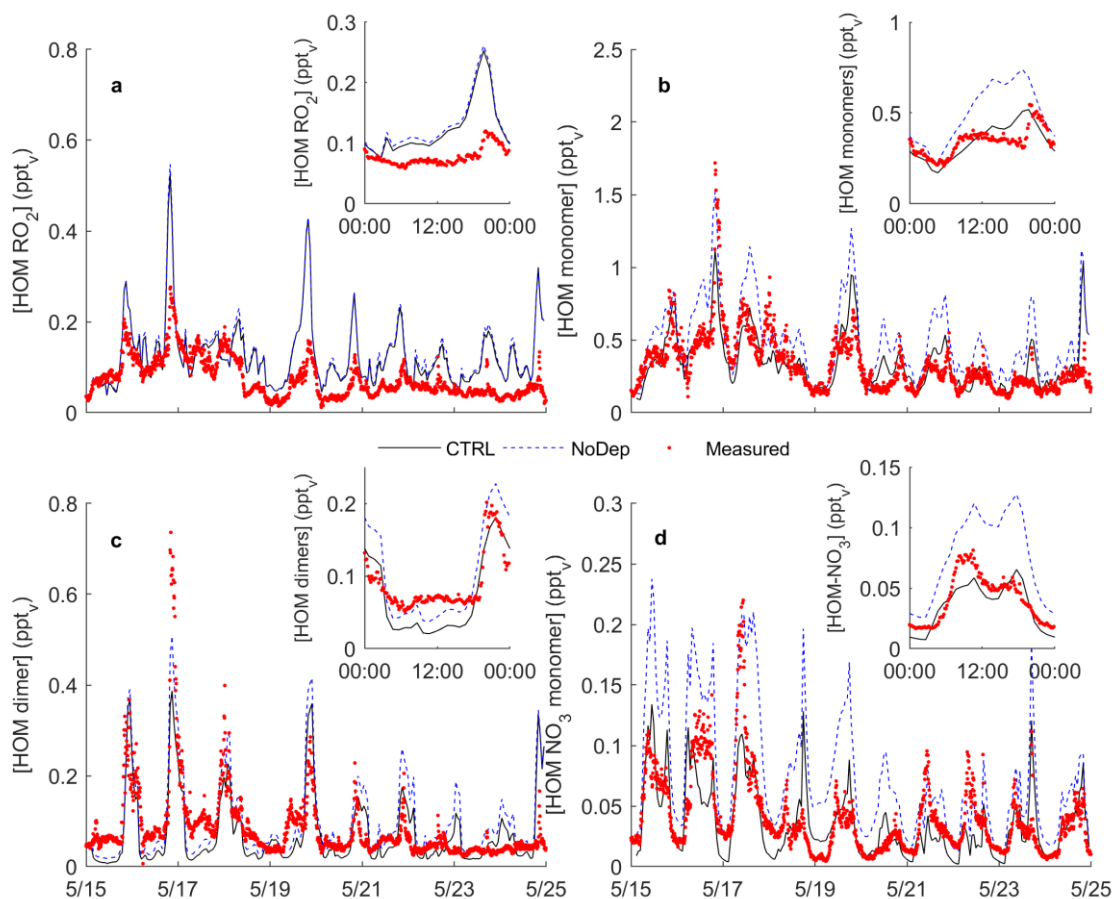

**Supplementary Figure 4.** Modelled and measured HOM gas-phase concentrations at the SMEAR II field station 15<sup>th</sup> to 24<sup>th</sup> of May, 2013. **a** HOM RO<sub>2</sub>, **b** HOM(g) closed-shell monomers, **c** HOM(g) dimers, and **d** HOM organonitrate monomers (HOM-NO<sub>3</sub>). The inset plots in each panel showing the modelled and measured mean diurnal trends of each HOM species type. The different model results are from the control run (CTRL), and a simulation without dry deposition of HOM (NoDep).

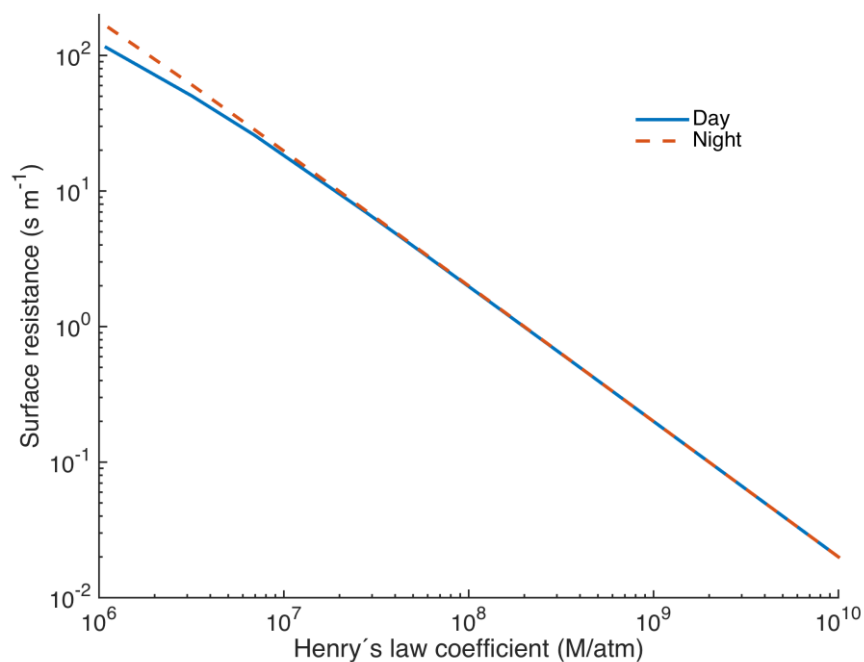

**Supplementary Figure 5.** Modelled daytime and nighttime surface resistances to uptake of gases as a function of their Henry's law coefficient ( $H$ ). The  $H$  of HOM are typically larger than  $10^8$  M/atm (Supplementary Table 6) for which the surface resistance typically become less than 10 % of the combined aerodynamic and quasi-laminar resistance.

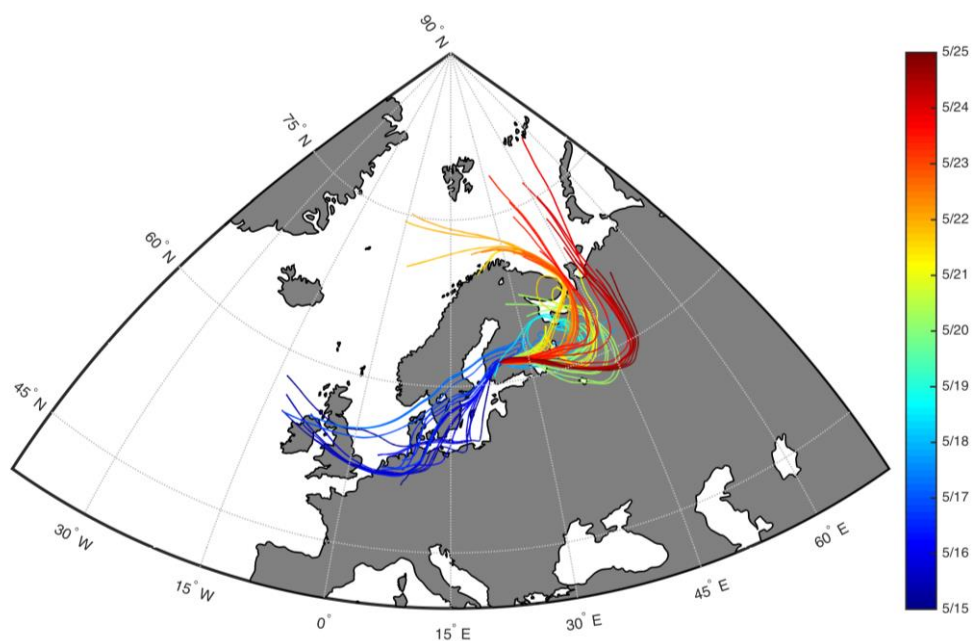

**Supplementary Figure 6.** 4-days HYSPLIT backward trajectories arriving at SMEAR II with 3 hours interval between 15<sup>th</sup> and 24<sup>th</sup> of May, 2013.

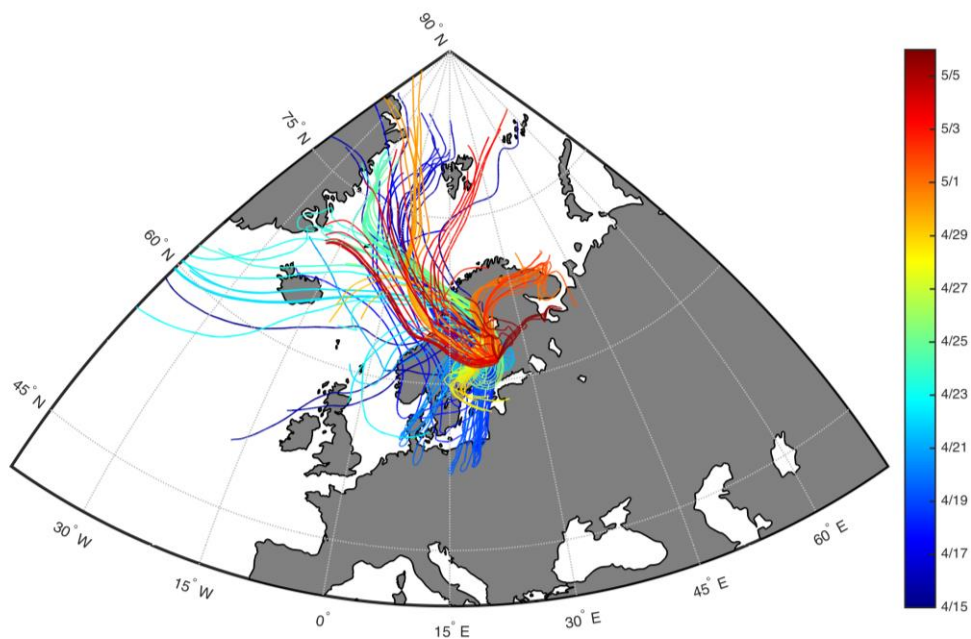

**Supplementary Figure 7.** 4-days HYSPLIT backward trajectories arriving at SMEAR II with 3 hours interval between 15<sup>th</sup> April and 5<sup>th</sup> of May, 2014.

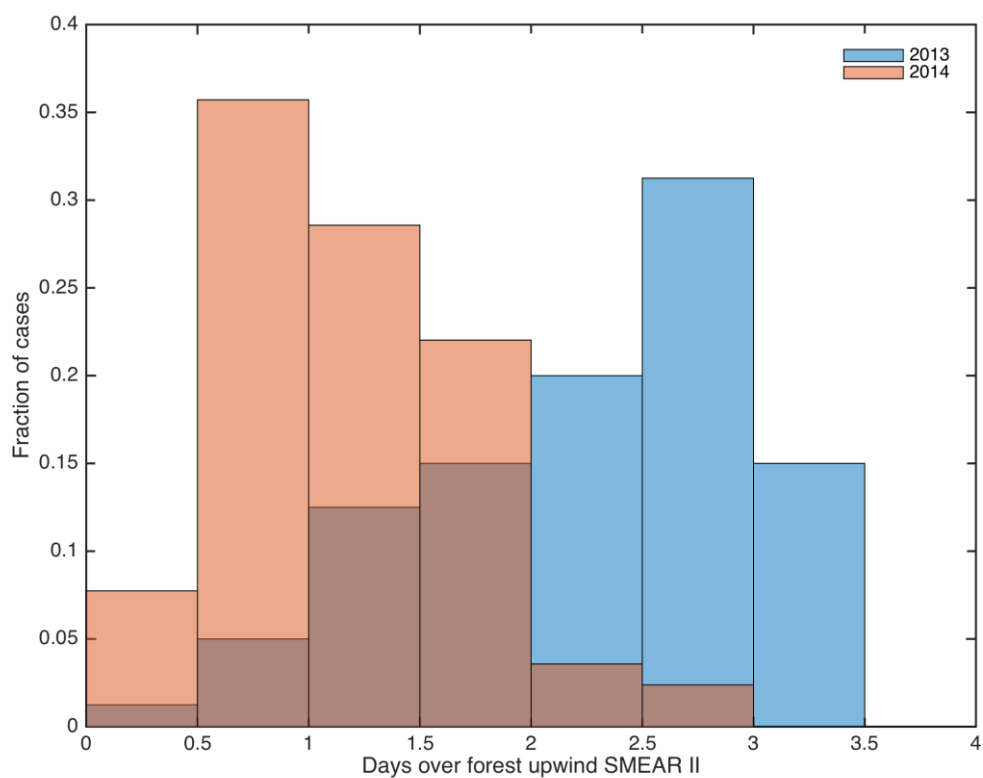

**Supplementary Figure 8.** Histograms with fraction of air masses that spend different amount of time over the boreal forest upwind SMEAR II during spring 2013 (15<sup>th</sup> to 24<sup>th</sup> of May) and spring 2014 (15<sup>th</sup> of April to 5<sup>th</sup> of May).

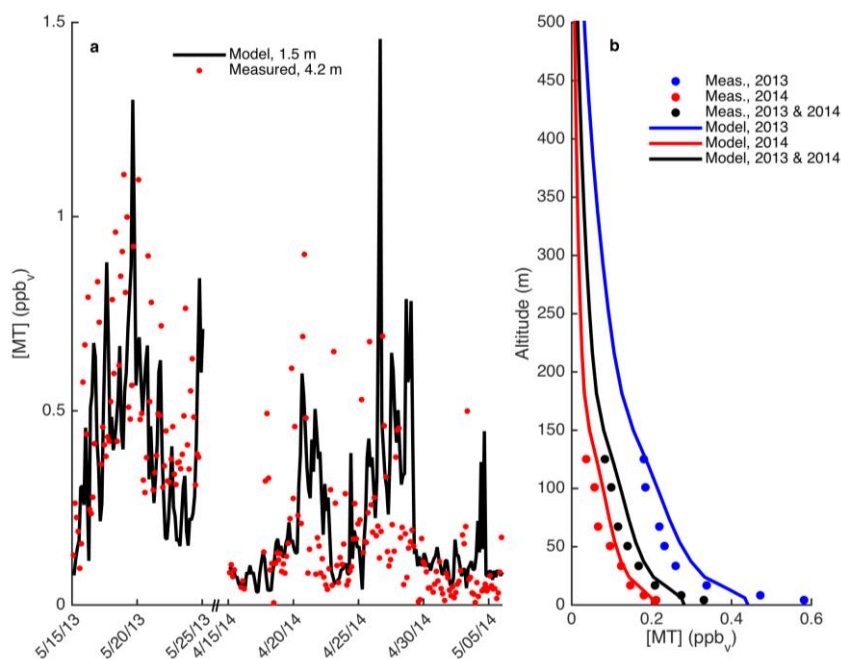

**Supplementary Figure 9.** Measured and modelled monoterpene concentrations ([MT]) at SMEAR II 15<sup>th</sup> to 24<sup>th</sup> of May 2013 and 15<sup>th</sup> of April to 5<sup>th</sup> of May 2014. Panel **a** shows the measured and modelled monoterpene concentrations close to the surface (Model: 1.5 m above ground, Measured: 4.2 m above ground). Panel **b** shows the measured and modelled average vertical concentration profiles for the 2013 period (15<sup>th</sup> to 24<sup>th</sup> of May), the 2014 period (15<sup>th</sup> of April to 5<sup>th</sup> of May) and the average for both periods. The monoterpene concentration was measured at 8 altitudes starting from 4.2 m above ground and extending up to 125 m. Both the model and measurements gives a factor of two higher average monoterpene concentrations during the 2013 period compared to the 2014 period.

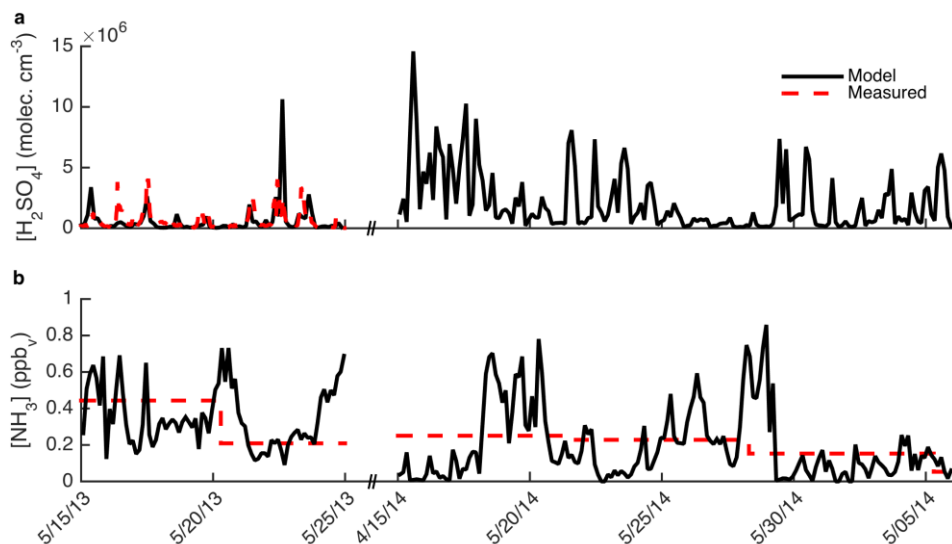

**Supplementary Figure 10.** Panel **a** shows the measured and modelled  $\text{H}_2\text{SO}_4$  concentration at SMEAR II during the periods 15<sup>th</sup> of May to 24<sup>th</sup> of May 2013 and 15<sup>th</sup> of April to 5<sup>th</sup> of May 2014. The sulfuric acid concentration was measured with the CI-API-TOF that also measured the HOM concentrations. Panel **b** shows the measured and modelled ammonia concentrations during the periods 15<sup>th</sup> of May to 24<sup>th</sup> of May 2013 and 15<sup>th</sup> of April to 5<sup>th</sup> of May 2014. The modelled ammonia results are from SMEAR II while the ammonia measurements were performed with a filter-based technique with one week resolution at the European Monitoring and Evaluation Programme (EMEP) station Ähtäri II, 85 km north from SMEAR II. The average measured and modelled  $\text{H}_2\text{SO}_4$  concentrations during the 2013 period were  $5.4 \times 10^5$  molecules  $\text{cm}^{-3}$  and  $6.1 \times 10^5$  molecules  $\text{cm}^{-3}$  respectively. For the spring 2014 period the modelled average  $\text{H}_2\text{SO}_4$  concentration was  $2.1 \times 10^6$  molecules  $\text{cm}^{-3}$ . The average measured  $\text{NH}_3$  concentrations for the 2013 and 2014 spring period were 0.35 and 0.20  $\text{ppb}_v$  respectively. The modelled  $\text{NH}_3$  concentrations for the 2013 and 2014 spring period were 0.33 and 0.19  $\text{ppb}_v$  respectively.

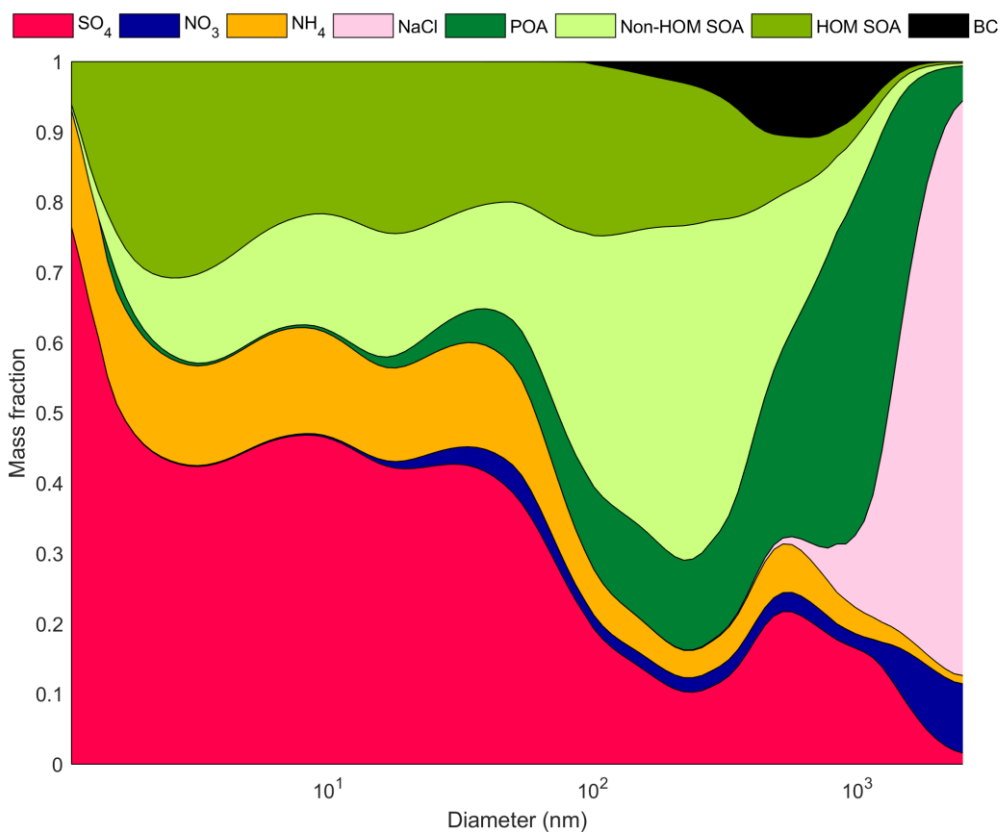

**Supplementary Figure 11.** Modelled size resolved chemical composition of particles in the diameter size range 1.07 nm to 2.5  $\mu\text{m}$  ( $\text{PM}_{2.5}$ ) for the periods 15<sup>th</sup> to 24<sup>th</sup> of May, 2013 and 15<sup>th</sup> of April to 5<sup>th</sup> of May, 2014.

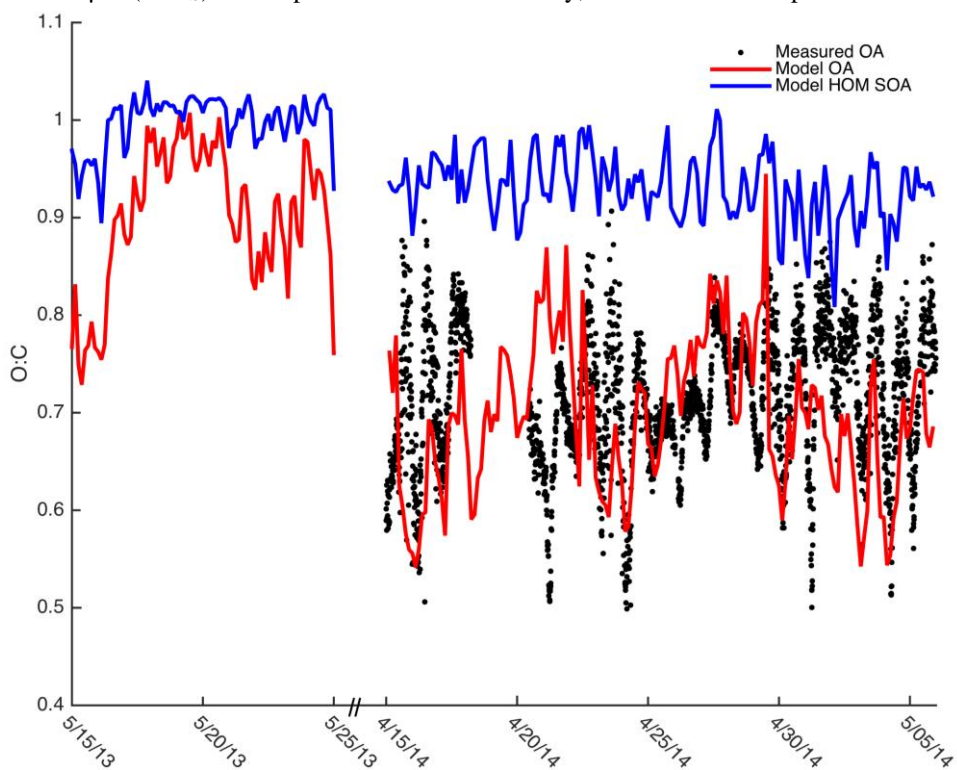

**Supplementary Figure 12.** Modelled and measured (from the AMS) O:C of the  $\text{PM}_1$  OA mass at SMEAR II. The O:C for the HOM SOA is also shown. During spring 2014 the measured and modelled average O:C are 0.72 and 0.70 respectively. The O:C of the modelled HOM SOA are on average 0.93 during spring 2014 and 1.00 during spring 2013.



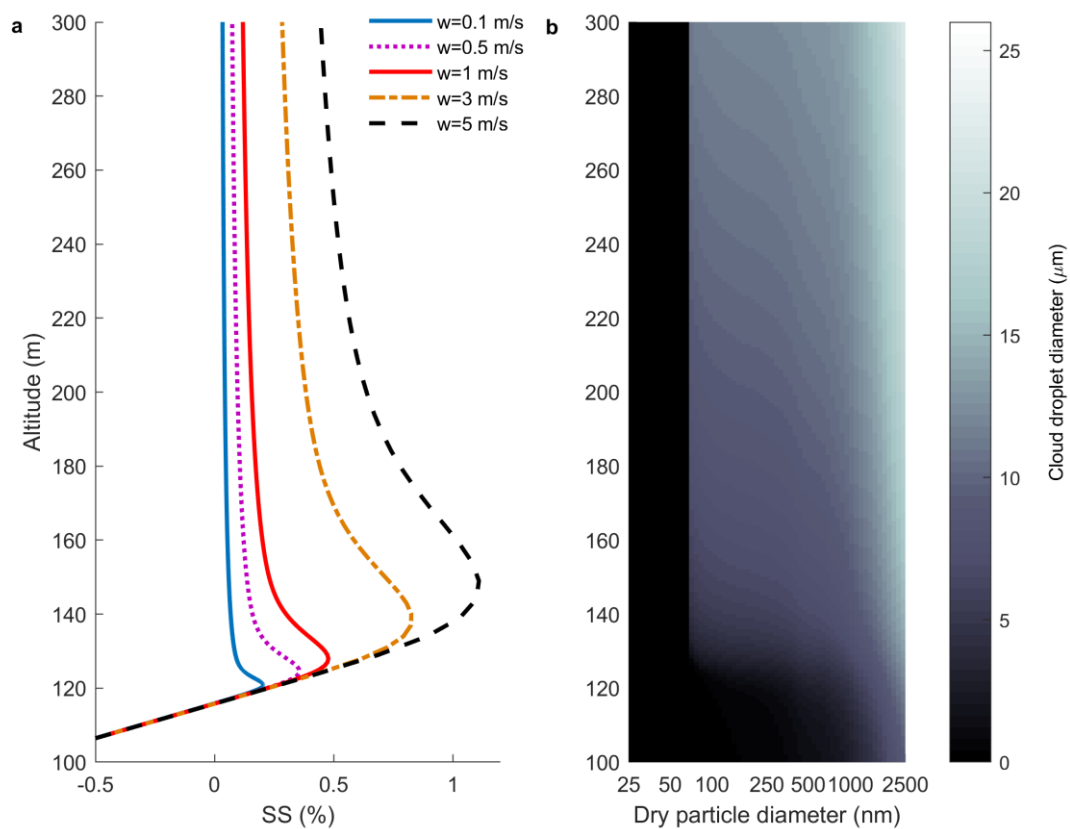

**Supplementary Figure 13.** Example with results from the adiabatic cloud parcel model. Panel **a** shows the modelled cloud water vapour supersaturation (SS) as a function of the altitude for the updraft velocities ( $w$ ): 0.1, 0.5, 1, 3 and 5 m/s. The maximum SS ( $SS_{\max}$ ) is reached within a few to a few 10s of meters from the cloud base at an altitude of  $\sim 115$  m. All cloud parcels were assumed to start at the ground (0 m) with an initial relative humidity of 95 % ( $SS = -5.0$  %). Panel **b** illustrates how the cloud droplet diameters changes as a function of altitude for a simulation with  $w=1$  m/s (red curve in panel **a**). At this updraft velocity all particles with an initial dry particle diameter larger than 68 nm are activated and grow into cloud droplets. In this example we used the modelled aerosol particle properties from the surface layer at SMEAR II, from 8 pm on the 24<sup>th</sup> of April 2014, as input to the adiabatic cloud parcel model.

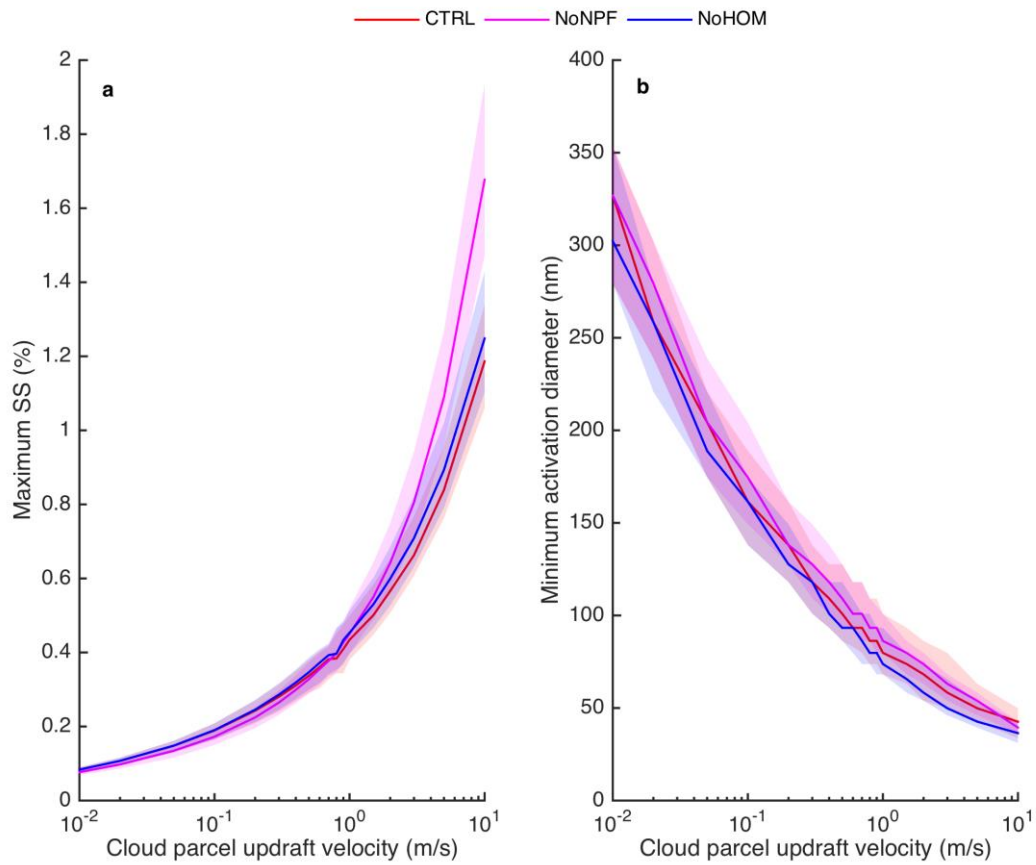

**Supplementary Figure 14.** Panel (a) shows the maximum cloud water vapour supersaturation (SS) and (b) minimum dry particle diameter of the particles that are activated into cloud droplets as a function of the adiabatic cloud parcel model updraft velocity. The curves illustrates the median results from the CTRL, NoNPF and NoHOM simulations that cover conditions during the periods May 15-24, 2013 and April 15 to May 5, 2014. The shaded areas shows the data span between the 25<sup>th</sup> and 75<sup>th</sup> percentiles.

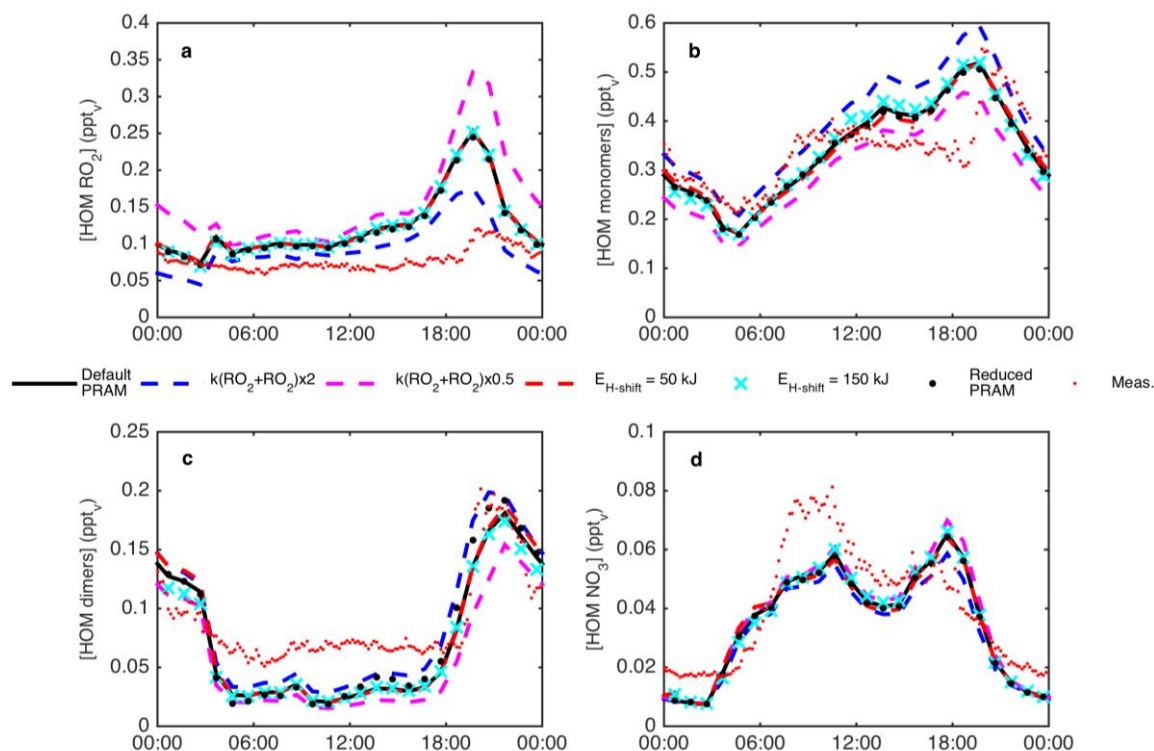

**Supplementary Figure 15.** Modelled and measured HOM(g) concentrations at SMEAR II between 15<sup>th</sup> and 24<sup>th</sup> of May, 2013. Panel **a** shows the concentrations of HOM peroxy radicals (RO<sub>2</sub>), **b** HOM closed shell monomers without nitrate functional groups, **c** HOM dimers, and **d** closed shell HOM organonitrate monomers (HOM-NO<sub>3</sub>). The inset plots in each panel shows the mean diurnal concentration trends of each HOM species type. The different model results are from the PRAM model sensitivity tests where the RO<sub>2</sub> + RO<sub>2</sub> reaction rates ( $k(\text{RO}_2 + \text{RO}_2)$ ) were scaled up or down with a factor of two compared to the default values (Supplementary Table 4) or when the RO<sub>2</sub> H-shift activation energies ( $E_{\text{H-shift}}$ ) were scaled up or down with 50 kJ from the default value of 100 kJ. Shown are also the results from a model simulation using the reduced PRAM version without explicit representation of individual dimer HOM species (Supplementary Table 7).

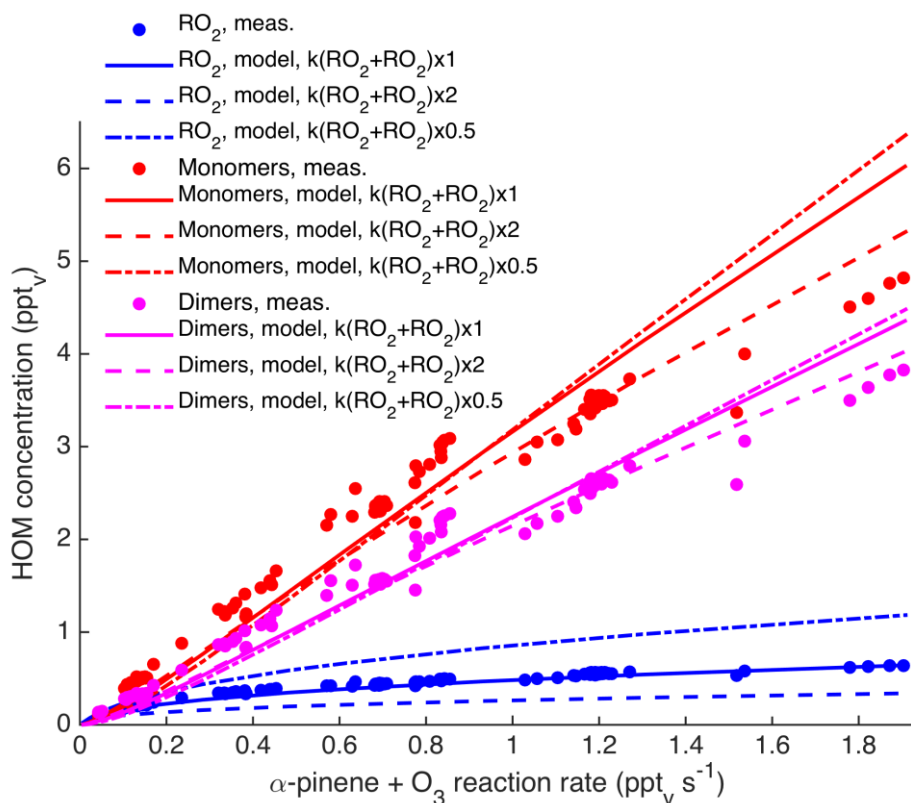

**Supplementary Figure 16.** Modelled and measured HOM(g) concentrations during a JPAC  $\alpha$ -pinene ozonolysis experiment<sup>1</sup>. The different model results are from the PRAM model sensitivity tests where all  $\text{RO}_2 + \text{RO}_2$  reaction rates ( $k(\text{RO}_2 + \text{RO}_2)$ ) were scaled up or down with a factor of two compared to the default values (Supplementary Table 4).

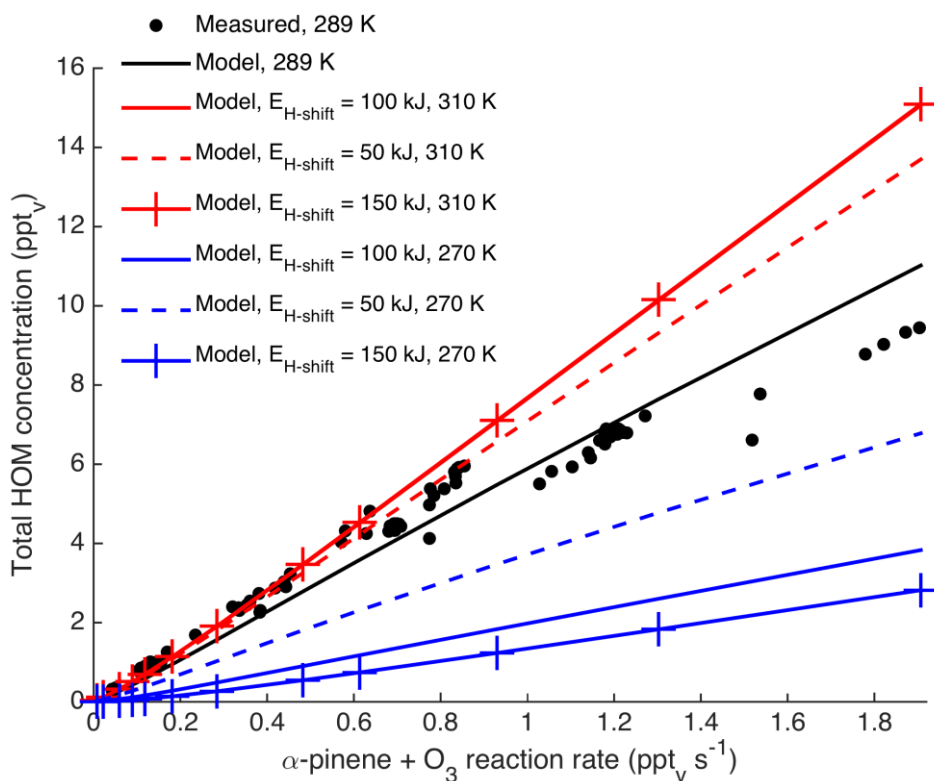

**Supplementary Figure 17.** Modelled and measured HOM(g) concentrations during a JPAC  $\alpha$ -pinene ozonolysis experiment<sup>1</sup>. The different model results are from the PRAM model sensitivity tests with different  $\text{RO}_2$  H-shift activation energies ( $E_{\text{H-shift}}$ ). At the reference temperature 289 K, the  $\text{RO}_2$  autoxidation reaction rates and the model results are identical for the different PRAM model setups.

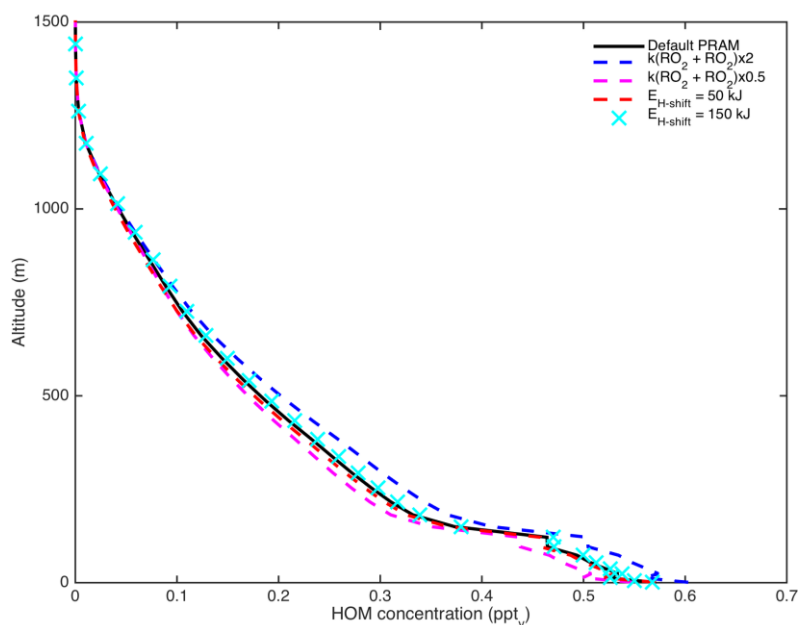

**Supplementary Figure 18.** Modelled average vertical HOM concentration profiles at SMEAR II between 15<sup>th</sup> and 24<sup>th</sup> of May, 2013. The results are from the different model sensitivity tests where the  $\text{RO}_2 + \text{RO}_2$  reaction rates ( $k(\text{RO}_2 + \text{RO}_2)$ ) were scaled up or down with a factor of two compared to the default values (Supplementary Table 4) or when the  $\text{RO}_2$  H-shift activation energies ( $E_{H\text{-shift}}$ ) were scaled up or down with 50 kJ from the default value of 100 kJ.

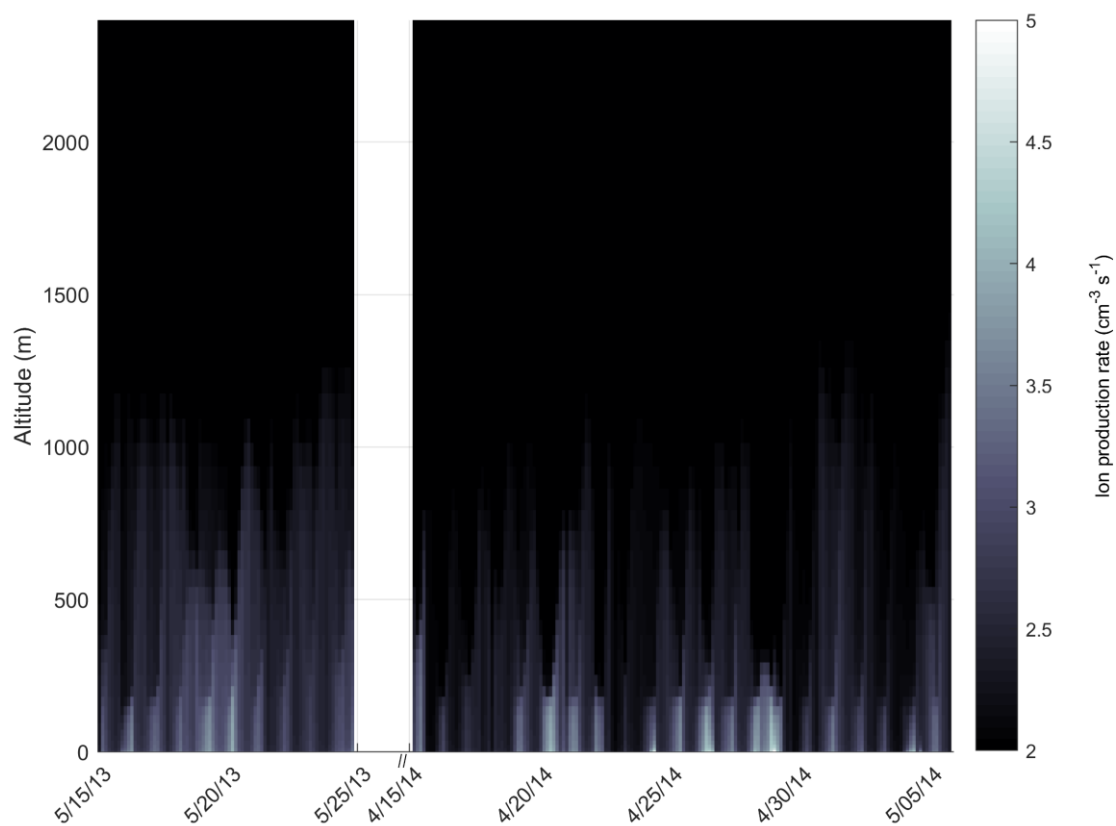

**Supplementary Figure 19.** Modelled ion production rate at the SMEAR II station caused by galactic cosmic rays and the decay of radon. The ion production rates were used as input to the atmospheric cluster dynamics code (ACDC).

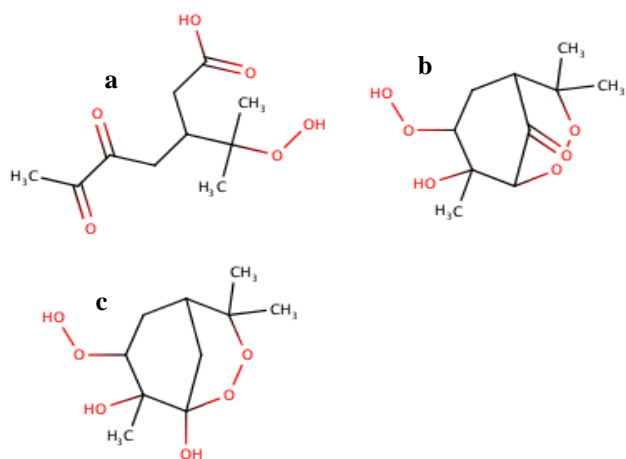

**Supplementary Figure 20.** Molecular structures of the PRAM HOM species **a** C<sub>10</sub>H<sub>16</sub>O<sub>6</sub>iso1, **b** C<sub>10</sub>H<sub>16</sub>O<sub>6</sub>iso2 and **c** C<sub>10</sub>H<sub>18</sub>O<sub>6</sub>.

## Supplementary Tables

**Supplementary Table 1.** Yield of formation of the initial RO<sub>2</sub> species that undergo autoxidation in PRAM<sup>1</sup>

| Monoterpene      | Oxidant        | Yield of RO <sub>2</sub> that initiates the autoxidation.                                                          |
|------------------|----------------|--------------------------------------------------------------------------------------------------------------------|
| $\alpha$ -pinene | O <sub>3</sub> | In total the theoretical maximum HOM yield become 9 % during no NO <sub>x</sub> conditions.                        |
| $\beta$ -pinene  | O <sub>3</sub> | Not considered in this work, $\leq 0.1$ % according to smog chamber and flow tube experiments <sup>2,3</sup>       |
| Limonene         | O <sub>3</sub> | 21.9 %, Comparable with the final HOM yield of 17 % estimated by Ehn et al. <sup>2</sup>                           |
| Carene           | O <sub>3</sub> | Same as $\alpha$ -pinene                                                                                           |
| $\alpha$ -pinene | OH             | 2.5 % after the initial $\alpha$ -pinene + OH. Comparable with the 2.4 % HOM yield from Berndt et al. <sup>4</sup> |
| $\beta$ -pinene  | OH             | 1.0 % after the initial $\alpha$ -pinene + OH. Jokinen et al. estimated a HOM molar yield of 0.58 % <sup>3</sup>   |
| Limonene         | OH             | 1.0 % after the initial $\alpha$ -pinene + OH. Jokinen et al. estimated a HOM molar yield of 0.93 % <sup>3</sup>   |
| Carene           | OH             | Same as $\alpha$ -pinene                                                                                           |

**Supplementary Table 2a.** List of PRAM<sup>1</sup> species formed when monoterpenes are oxidized by ozone. The table includes the species name in PRAM, molecular formula, compound type, functional groups used when estimating their pure liquid saturation vapour pressure ( $p_0$ ) using SIMPOL<sup>5</sup> and their  $p_0$  at 298 K. The peroxy and alkoxy radical functional groups are not listed and were not considered when we calculated  $p_0$ .

| PRAM name   | Molecular formula                               | Type            | Alcohol | Aldehyde | Ketone | Nitrate | Endoperoxide | Hydroperoxide | Peroxy acid | Carboxylic acid | $\log_{10}(p_0)$ (Pa) at 298 K |
|-------------|-------------------------------------------------|-----------------|---------|----------|--------|---------|--------------|---------------|-------------|-----------------|--------------------------------|
| C10H15O2O2  | C <sub>10</sub> H <sub>15</sub> O <sub>4</sub>  | RO <sub>2</sub> |         | 1        | 1      |         |              |               |             |                 | 0.35                           |
| C10H15O3O2  | C <sub>10</sub> H <sub>15</sub> O <sub>5</sub>  | RO <sub>2</sub> |         | 1        | 2      |         |              |               |             |                 | 0.59                           |
| C10H15O4O2  | C <sub>10</sub> H <sub>15</sub> O <sub>6</sub>  | RO <sub>2</sub> |         | 1        | 1      |         |              | 1             |             |                 | -2.1                           |
| C10H15O5O2  | C <sub>10</sub> H <sub>15</sub> O <sub>7</sub>  | RO <sub>2</sub> |         | 1        | 2      |         |              | 1             |             |                 | -3.0                           |
| C10H15O6O2  | C <sub>10</sub> H <sub>15</sub> O <sub>8</sub>  | RO <sub>2</sub> |         |          | 1      |         |              | 1             | 1           |                 | -3.2                           |
| C10H15O7O2  | C <sub>10</sub> H <sub>15</sub> O <sub>9</sub>  | RO <sub>2</sub> |         |          | 2      |         |              | 1             | 1           |                 | -4.1                           |
| C10H15O8O2  | C <sub>10</sub> H <sub>15</sub> O <sub>10</sub> | RO <sub>2</sub> |         |          | 1      |         |              | 2             | 1           |                 | -5.6                           |
| C10H15O9O2  | C <sub>10</sub> H <sub>15</sub> O <sub>11</sub> | RO <sub>2</sub> |         |          | 2      |         |              | 2             | 1           |                 | -6.6                           |
| C10H15O10O2 | C <sub>10</sub> H <sub>15</sub> O <sub>12</sub> | RO <sub>2</sub> |         |          | 1      |         |              | 3             | 1           |                 | -8.1                           |
| C10H15O11O2 | C <sub>10</sub> H <sub>15</sub> O <sub>13</sub> | RO <sub>2</sub> |         |          | 2      |         |              | 3             | 1           |                 | -9.0                           |
| C10H15O12O2 | C <sub>10</sub> H <sub>15</sub> O <sub>14</sub> | RO <sub>2</sub> |         |          |        |         |              | 3             | 2           |                 | -9.6                           |
| C10H15O2O   | C <sub>10</sub> H <sub>15</sub> O <sub>3</sub>  | RO              |         | 1        | 1      |         |              |               |             |                 | 0.35                           |
| C10H15O3O   | C <sub>10</sub> H <sub>15</sub> O <sub>4</sub>  | RO              |         | 1        | 2      |         |              |               |             |                 | 0.59                           |
| C10H15O4O   | C <sub>10</sub> H <sub>15</sub> O <sub>5</sub>  | RO              |         | 1        | 1      |         |              | 1             |             |                 | -2.1                           |
| C10H15O5O   | C <sub>10</sub> H <sub>15</sub> O <sub>6</sub>  | RO              |         | 1        | 2      |         |              | 1             |             |                 | -3.0                           |
| C10H15O6O   | C <sub>10</sub> H <sub>15</sub> O <sub>7</sub>  | RO              |         |          | 1      |         |              | 1             | 1           |                 | -3.2                           |
| C10H15O7O   | C <sub>10</sub> H <sub>15</sub> O <sub>8</sub>  | RO              |         |          | 2      |         |              | 1             | 1           |                 | -4.1                           |
| C10H15O8O   | C <sub>10</sub> H <sub>15</sub> O <sub>9</sub>  | RO              |         |          | 1      |         |              | 2             | 1           |                 | -5.6                           |
| C10H15O9O   | C <sub>10</sub> H <sub>15</sub> O <sub>10</sub> | RO              |         |          | 2      |         |              | 2             | 1           |                 | -6.6                           |
| C10H15O10O  | C <sub>10</sub> H <sub>15</sub> O <sub>11</sub> | RO              |         |          | 1      |         |              | 3             | 1           |                 | -8.1                           |
| C10H15O11O  | C <sub>10</sub> H <sub>15</sub> O <sub>12</sub> | RO              |         |          | 2      |         |              | 3             | 1           |                 | -9.0                           |
| C10H15O12O  | C <sub>10</sub> H <sub>15</sub> O <sub>13</sub> | RO              |         |          |        |         |              | 3             | 2           |                 | -9.6                           |
| C10H14O3    | C <sub>10</sub> H <sub>14</sub> O <sub>3</sub>  | RCHO            |         | 2        | 1      |         |              |               |             |                 | -0.97                          |
| C10H14O4    | C <sub>10</sub> H <sub>14</sub> O <sub>4</sub>  | RCHO            |         | 1        | 3      |         |              |               |             |                 | -1.5                           |
| C10H14O5    | C <sub>10</sub> H <sub>14</sub> O <sub>5</sub>  | RCHO            |         | 1        | 2      |         |              | 1             |             |                 | -3.0                           |
| C10H14O6    | C <sub>10</sub> H <sub>14</sub> O <sub>6</sub>  | RCHO            |         | 1        | 3      |         |              | 1             |             |                 | -4.0                           |
| C10H14O7    | C <sub>10</sub> H <sub>14</sub> O <sub>7</sub>  | RCHO            |         |          | 2      |         |              | 1             | 1           |                 | -4.1                           |
| C10H14O8    | C <sub>10</sub> H <sub>14</sub> O <sub>8</sub>  | RCHO            |         |          | 3      |         |              | 1             | 1           |                 | -5.1                           |
| C10H14O9    | C <sub>10</sub> H <sub>14</sub> O <sub>9</sub>  | RCHO            |         |          | 2      |         |              | 2             | 1           |                 | -6.6                           |
| C10H14O10   | C <sub>10</sub> H <sub>14</sub> O <sub>10</sub> | RCHO            |         |          | 3      |         |              | 2             | 1           |                 | -7.5                           |
| C10H14O11   | C <sub>10</sub> H <sub>14</sub> O <sub>11</sub> | RCHO            |         |          | 2      |         |              | 3             | 1           |                 | -9.0                           |

|              |                                                  |                            |   |   |   |   |   |   |       |      |
|--------------|--------------------------------------------------|----------------------------|---|---|---|---|---|---|-------|------|
| C10H14O12    | C <sub>10</sub> H <sub>14</sub> O <sub>12</sub>  | RCHO                       |   |   | 3 |   | 3 | 1 | -10.0 |      |
| C10H14O13    | C <sub>10</sub> H <sub>14</sub> O <sub>13</sub>  | RCHO                       |   |   | 1 |   | 3 | 2 | -10.5 |      |
| C10H16O3     | C <sub>10</sub> H <sub>16</sub> O <sub>3</sub>   | ROH                        | 1 | 1 | 1 |   |   |   | -1.8  |      |
| C10H16O4iso1 | C <sub>10</sub> H <sub>16</sub> O <sub>4</sub>   | RCOOH                      | 1 |   | 1 |   |   | 1 | -4.0  |      |
| C10H16O5iso1 | C <sub>10</sub> H <sub>16</sub> O <sub>5</sub>   | RCOOH                      |   |   | 1 |   | 1 | 1 | -4.3  |      |
| C10H16O6iso1 | C <sub>10</sub> H <sub>16</sub> O <sub>6</sub>   | RCOOH<br>or ROOH           |   |   | 2 |   |   | 1 | 1     | -5.2 |
| C10H16O7iso1 | C <sub>10</sub> H <sub>16</sub> O <sub>7</sub>   | ROOH or<br>ROH             | 1 |   | 1 |   | 1 | 1 | -5.4  |      |
| C10H16O8iso1 | C <sub>10</sub> H <sub>16</sub> O <sub>8</sub>   | ROOH or<br>ROH             | 1 |   | 2 |   | 1 | 1 | -6.3  |      |
| C10H16O9iso1 | C <sub>10</sub> H <sub>16</sub> O <sub>9</sub>   | ROOH or<br>ROH             | 1 |   | 1 |   | 2 | 1 | -7.8  |      |
| C10H16O10    | C <sub>10</sub> H <sub>16</sub> O <sub>10</sub>  | ROOH or<br>ROH             | 1 |   | 2 |   | 2 | 1 | -8.8  |      |
| C10H16O11    | C <sub>10</sub> H <sub>16</sub> O <sub>11</sub>  | ROOH or<br>ROH             | 1 |   | 1 |   | 3 | 1 | -10.3 |      |
| C10H16O12    | C <sub>10</sub> H <sub>16</sub> O <sub>12</sub>  | ROOH or<br>ROH             | 1 |   | 2 |   | 3 | 1 | -11.2 |      |
| C10H16O13    | C <sub>10</sub> H <sub>16</sub> O <sub>13</sub>  | ROOH or<br>ROH             | 1 |   |   |   | 3 | 2 | -11.8 |      |
| C10H16O14    | C <sub>10</sub> H <sub>16</sub> O <sub>14</sub>  | ROOH                       |   |   |   |   | 4 | 2 | -12.0 |      |
| C10H15O2NO3  | C <sub>10</sub> H <sub>15</sub> NO <sub>5</sub>  | R-O-NO <sub>2</sub>        |   | 1 | 1 | 1 |   |   | -1.8  |      |
| C10H15O3NO3  | C <sub>10</sub> H <sub>15</sub> NO <sub>6</sub>  | R-O-NO <sub>2</sub>        |   | 1 | 2 | 1 |   |   | -2.8  |      |
| C10H15O4NO3  | C <sub>10</sub> H <sub>15</sub> NO <sub>7</sub>  | R-O-NO <sub>2</sub>        |   | 1 | 1 | 1 |   | 1 | -4.3  |      |
| C10H15O5NO3  | C <sub>10</sub> H <sub>15</sub> NO <sub>8</sub>  | R-O-NO <sub>2</sub>        |   | 1 | 2 | 1 | 1 |   | -5.2  |      |
| C10H15O6NO3  | C <sub>10</sub> H <sub>15</sub> NO <sub>9</sub>  | R-O-NO <sub>2</sub>        |   |   | 1 | 1 | 1 | 1 | -5.4  |      |
| C10H15O7NO3  | C <sub>10</sub> H <sub>15</sub> NO <sub>10</sub> | R-O-NO <sub>2</sub>        |   |   | 2 | 1 | 1 | 1 | -6.3  |      |
| C10H15O8NO3  | C <sub>10</sub> H <sub>15</sub> NO <sub>11</sub> | R-O-NO <sub>2</sub>        |   |   | 1 | 1 | 2 | 1 | -7.8  |      |
| C10H15O9NO3  | C <sub>10</sub> H <sub>15</sub> NO <sub>12</sub> | R-O-NO <sub>2</sub>        |   |   | 2 | 1 | 2 | 1 | -8.8  |      |
| C10H15O10NO3 | C <sub>10</sub> H <sub>15</sub> NO <sub>13</sub> | R-O-NO <sub>2</sub>        |   |   | 1 | 1 | 3 | 1 | -10.3 |      |
| C10H15O11NO3 | C <sub>10</sub> H <sub>15</sub> NO <sub>14</sub> | R-O-NO <sub>2</sub>        |   |   | 2 | 1 | 3 | 1 | -11.2 |      |
| C10H15O12NO3 | C <sub>10</sub> H <sub>15</sub> NO <sub>15</sub> | R-O-NO <sub>2</sub>        |   |   |   | 1 | 3 | 2 | -11.8 |      |
| C20H30O5     | C <sub>20</sub> H <sub>30</sub> O <sub>5</sub>   | ROOR                       | 1 | 1 | 1 |   | 1 |   | -6.5  |      |
| C20H30O6     | C <sub>20</sub> H <sub>30</sub> O <sub>6</sub>   | ROOR                       |   |   | 2 | 2 | 1 |   | -6.6  |      |
| C20H30O7     | C <sub>20</sub> H <sub>30</sub> O <sub>7</sub>   | ROOR                       | 1 | 1 | 3 |   | 1 |   | -8.4  |      |
| C20H30O8     | C <sub>20</sub> H <sub>30</sub> O <sub>8</sub>   | ROOR                       |   |   | 1 | 3 | 1 | 1 | -8.6  |      |
| C20H30O9     | C <sub>20</sub> H <sub>30</sub> O <sub>9</sub>   | ROOR                       | 1 | 1 | 2 |   | 1 | 1 | -9.8  |      |
| C20H30O10    | C <sub>20</sub> H <sub>30</sub> O <sub>10</sub>  | ROOR                       |   |   | 1 | 2 | 1 | 1 | -10.1 |      |
| C20H30O11    | C <sub>20</sub> H <sub>30</sub> O <sub>11</sub>  | ROOR                       | 1 | 1 | 2 |   | 1 | 1 | -12.3 |      |
| C20H30O12    | C <sub>20</sub> H <sub>30</sub> O <sub>12</sub>  | ROOR                       |   |   | 1 | 2 | 1 | 2 | -12.5 |      |
| C20H30O13    | C <sub>20</sub> H <sub>30</sub> O <sub>13</sub>  | ROOR                       | 1 | 1 | 2 |   | 1 | 2 | -14.7 |      |
| C20H30O14    | C <sub>20</sub> H <sub>30</sub> O <sub>14</sub>  | ROOR                       |   |   | 1 | 2 | 1 | 3 | -15.0 |      |
| C20H30O15    | C <sub>20</sub> H <sub>30</sub> O <sub>15</sub>  | ROOR                       | 1 | 1 | 2 |   | 1 | 2 | -17.2 |      |
| C20H30O16    | C <sub>20</sub> H <sub>30</sub> O <sub>16</sub>  | ROOR                       |   |   | 1 | 1 | 1 | 3 | -16.5 |      |
| C20H30O17    | C <sub>20</sub> H <sub>30</sub> O <sub>17</sub>  | ROOR                       | 1 | 1 | 1 |   | 1 | 3 | -18.7 |      |
| C20H31O4NO3  | C <sub>20</sub> H <sub>31</sub> NO <sub>7</sub>  | ROOR-<br>O-NO <sub>2</sub> |   |   | 1 | 1 | 1 |   | -6.5  |      |
| C20H31O5NO3  | C <sub>20</sub> H <sub>31</sub> NO <sub>8</sub>  | ROOR-<br>O-NO <sub>2</sub> |   |   | 1 | 2 | 1 | 1 | -7.4  |      |
| C20H31O6NO3  | C <sub>20</sub> H <sub>31</sub> NO <sub>9</sub>  | ROOR-<br>O-NO <sub>2</sub> |   |   | 1 | 1 | 1 | 1 | -8.9  |      |
| C20H31O7NO3  | C <sub>20</sub> H <sub>31</sub> NO <sub>10</sub> | ROOR-<br>O-NO <sub>2</sub> | 1 | 1 | 1 | 1 | 1 | 1 | -11.1 |      |
| C20H31O8NO3  | C <sub>20</sub> H <sub>31</sub> NO <sub>11</sub> | ROOR-<br>O-NO <sub>2</sub> |   |   | 1 | 1 | 1 | 1 | -10.0 |      |



|              |                                                  |                        |   |   |   |   |   |   |       |
|--------------|--------------------------------------------------|------------------------|---|---|---|---|---|---|-------|
| C20H31O9NO3  | C <sub>20</sub> H <sub>31</sub> NO <sub>12</sub> | ROOR-O-NO <sub>2</sub> | 1 | 1 | 1 | 1 | 1 | 1 | -12.2 |
| C20H31O10NO3 | C <sub>20</sub> H <sub>31</sub> NO <sub>13</sub> | ROOR-O-NO <sub>2</sub> |   | 1 | 1 | 1 | 2 | 1 | -12.5 |
| C20H31O11NO3 | C <sub>20</sub> H <sub>31</sub> NO <sub>14</sub> | ROOR-O-NO <sub>2</sub> | 1 | 1 | 1 | 1 | 2 | 1 | -14.7 |
| C20H31O12NO3 | C <sub>20</sub> H <sub>31</sub> NO <sub>15</sub> | ROOR-O-NO <sub>2</sub> |   | 1 | 1 | 1 | 3 | 1 | -14.9 |
| C20H31O13NO3 | C <sub>20</sub> H <sub>31</sub> NO <sub>16</sub> | ROOR-O-NO <sub>2</sub> |   | 1 | 1 | 1 | 2 | 2 | -14.9 |
| C20H31O14NO3 | C <sub>20</sub> H <sub>31</sub> NO <sub>17</sub> | ROOR-O-NO <sub>2</sub> |   |   | 1 | 1 | 3 | 2 | -16.4 |
| C20H31O15NO3 | C <sub>20</sub> H <sub>31</sub> NO <sub>18</sub> | ROOR-O-NO <sub>2</sub> |   | 1 | 1 | 1 | 3 | 2 | -17.3 |
| C19H28O5     | C <sub>19</sub> H <sub>28</sub> O <sub>5</sub>   | ROOR                   | 1 | 1 | 1 | 1 |   |   | -6.1  |
| C19H28O6     | C <sub>19</sub> H <sub>28</sub> O <sub>6</sub>   | ROOR                   |   | 2 | 2 | 1 |   |   | -6.1  |
| C19H28O7     | C <sub>19</sub> H <sub>28</sub> O <sub>7</sub>   | ROOR                   | 1 | 1 | 3 | 1 |   |   | -7.9  |
| C19H28O8     | C <sub>19</sub> H <sub>28</sub> O <sub>8</sub>   | ROOR                   |   | 1 | 3 | 1 | 1 |   | -8.2  |
| C19H28O9     | C <sub>19</sub> H <sub>28</sub> O <sub>9</sub>   | ROOR                   | 1 | 1 | 2 | 1 |   | 1 | -9.4  |
| C19H28O10    | C <sub>19</sub> H <sub>28</sub> O <sub>10</sub>  | ROOR                   |   | 1 | 2 | 1 | 1 | 1 | -9.7  |
| C19H28O11    | C <sub>19</sub> H <sub>28</sub> O <sub>11</sub>  | ROOR                   | 1 | 1 | 2 | 1 | 1 | 1 | -11.9 |
| C19H28O12    | C <sub>19</sub> H <sub>28</sub> O <sub>12</sub>  | ROOR                   |   | 1 | 2 | 1 | 2 | 1 | -12.1 |
| C19H28O13    | C <sub>19</sub> H <sub>28</sub> O <sub>13</sub>  | ROOR                   | 1 | 1 | 2 | 1 | 2 | 1 | -14.3 |
| C19H28O14    | C <sub>19</sub> H <sub>28</sub> O <sub>14</sub>  | ROOR                   |   | 1 | 2 | 1 | 3 | 1 | -14.6 |
| C19H28O15    | C <sub>19</sub> H <sub>28</sub> O <sub>15</sub>  | ROOR                   | 1 | 1 | 2 | 1 | 2 | 2 | -16.7 |
| C19H28O16    | C <sub>19</sub> H <sub>28</sub> O <sub>16</sub>  | ROOR                   |   | 1 | 1 | 1 | 3 | 2 | -16.0 |
| C19H28O17    | C <sub>19</sub> H <sub>28</sub> O <sub>17</sub>  | ROOR                   | 1 | 1 | 1 | 1 | 3 | 2 | -18.2 |
| C19H28O18    | C <sub>19</sub> H <sub>28</sub> O <sub>18</sub>  | ROOR                   |   |   | 1 | 1 | 3 | 3 | -17.2 |
| C19H29O5NO3  | C <sub>19</sub> H <sub>29</sub> NO <sub>8</sub>  | ROOR-O-NO <sub>2</sub> |   | 1 | 2 | 1 | 1 |   | -7.0  |
| C19H29O6NO3  | C <sub>19</sub> H <sub>29</sub> NO <sub>9</sub>  | ROOR-O-NO <sub>2</sub> |   | 1 | 1 | 1 | 1 | 1 | -8.5  |
| C19H29O7NO3  | C <sub>19</sub> H <sub>29</sub> NO <sub>10</sub> | ROOR-O-NO <sub>2</sub> | 1 | 1 | 1 | 1 | 1 | 1 | -10.7 |
| C19H29O8NO3  | C <sub>19</sub> H <sub>29</sub> NO <sub>11</sub> | ROOR-O-NO <sub>2</sub> |   |   | 1 | 1 | 1 | 1 | -9.6  |
| C19H29O9NO3  | C <sub>19</sub> H <sub>29</sub> NO <sub>12</sub> | ROOR-O-NO <sub>2</sub> | 1 |   | 1 | 1 | 1 | 1 | -11.8 |
| C19H29O10NO3 | C <sub>19</sub> H <sub>29</sub> NO <sub>13</sub> | ROOR-O-NO <sub>2</sub> |   |   | 1 | 1 | 1 | 2 | -12.0 |
| C19H29O11NO3 | C <sub>19</sub> H <sub>29</sub> NO <sub>14</sub> | ROOR-O-NO <sub>2</sub> | 1 |   | 1 | 1 | 1 | 2 | -14.2 |
| C19H29O12NO3 | C <sub>19</sub> H <sub>29</sub> NO <sub>15</sub> | ROOR-O-NO <sub>2</sub> |   |   | 1 | 1 | 1 | 3 | -14.5 |
| C19H29O13NO3 | C <sub>19</sub> H <sub>29</sub> NO <sub>16</sub> | ROOR-O-NO <sub>2</sub> |   |   | 1 | 1 | 1 | 2 | -14.5 |
| C19H29O14NO3 | C <sub>19</sub> H <sub>29</sub> NO <sub>17</sub> | ROOR-O-NO <sub>2</sub> |   |   |   | 1 | 1 | 3 | -16.0 |
| C19H29O15NO3 | C <sub>19</sub> H <sub>29</sub> NO <sub>18</sub> | ROOR-O-NO <sub>2</sub> |   |   | 1 | 1 | 1 | 3 | -16.9 |
| C18H26O4     | C <sub>18</sub> H <sub>26</sub> O <sub>4</sub>   | ROOR                   |   | 1 | 1 | 1 |   |   | -3.4  |
| C18H26O5     | C <sub>18</sub> H <sub>26</sub> O <sub>5</sub>   | ROOR                   | 1 | 1 | 1 | 1 |   |   | -5.6  |
| C18H26O6     | C <sub>18</sub> H <sub>26</sub> O <sub>6</sub>   | ROOR                   |   | 2 | 2 | 1 |   |   | -5.7  |
| C18H26O7     | C <sub>18</sub> H <sub>26</sub> O <sub>7</sub>   | ROOR                   | 1 | 1 | 3 | 1 |   |   | -7.5  |
| C18H26O8     | C <sub>18</sub> H <sub>26</sub> O <sub>8</sub>   | ROOR                   |   | 1 | 3 | 1 | 1 |   | -7.8  |
| C18H26O9     | C <sub>18</sub> H <sub>26</sub> O <sub>9</sub>   | ROOR                   | 1 | 1 | 2 | 1 |   | 1 | -9.0  |
| C18H26O10    | C <sub>18</sub> H <sub>26</sub> O <sub>10</sub>  | ROOR                   |   | 1 | 2 | 1 | 1 | 1 | -9.2  |
| C18H26O11    | C <sub>18</sub> H <sub>26</sub> O <sub>11</sub>  | ROOR                   | 1 | 1 | 2 | 1 | 1 | 1 | -11.4 |
| C18H26O12    | C <sub>18</sub> H <sub>26</sub> O <sub>12</sub>  | ROOR                   |   | 1 | 2 | 1 | 2 | 1 | -11.7 |
| C18H26O13    | C <sub>18</sub> H <sub>26</sub> O <sub>13</sub>  | ROOR                   | 1 | 1 | 2 | 1 | 2 | 1 | -13.9 |

|              |                                                  |                        |   |   |   |   |   |   |   |       |
|--------------|--------------------------------------------------|------------------------|---|---|---|---|---|---|---|-------|
| C18H26O14    | C <sub>18</sub> H <sub>26</sub> O <sub>14</sub>  | ROOR                   |   | 1 | 2 |   | 1 | 3 | 1 | -14.1 |
| C18H26O15    | C <sub>18</sub> H <sub>26</sub> O <sub>15</sub>  | ROOR                   | 1 | 1 | 2 |   | 1 | 2 | 2 | -16.3 |
| C18H26O16    | C <sub>18</sub> H <sub>26</sub> O <sub>16</sub>  | ROOR                   |   | 1 | 1 |   | 1 | 3 | 2 | -15.6 |
| C18H26O17    | C <sub>18</sub> H <sub>26</sub> O <sub>17</sub>  | ROOR                   | 1 | 1 | 1 |   | 1 | 3 | 2 | -17.8 |
| C18H26O18    | C <sub>18</sub> H <sub>26</sub> O <sub>18</sub>  | ROOR                   |   |   | 1 |   | 1 | 3 | 3 | -16.7 |
| C18H27O6NO3  | C <sub>18</sub> H <sub>27</sub> NO <sub>9</sub>  | ROOR-O-NO <sub>2</sub> |   | 1 | 1 | 1 | 1 | 1 |   | -8.1  |
| C18H27O7NO3  | C <sub>18</sub> H <sub>27</sub> NO <sub>10</sub> | ROOR-O-NO <sub>2</sub> | 1 | 1 | 1 | 1 | 1 | 1 |   | -10.3 |
| C18H27O8NO3  | C <sub>18</sub> H <sub>27</sub> NO <sub>11</sub> | ROOR-O-NO <sub>2</sub> |   |   | 1 | 1 | 1 | 1 | 1 | -9.2  |
| C18H27O9NO3  | C <sub>18</sub> H <sub>27</sub> NO <sub>12</sub> | ROOR-O-NO <sub>2</sub> | 1 |   | 1 | 1 | 1 | 1 | 1 | -11.4 |
| C18H27O10NO3 | C <sub>18</sub> H <sub>27</sub> NO <sub>13</sub> | ROOR-O-NO <sub>2</sub> |   |   | 1 | 1 | 1 | 2 | 1 | -11.6 |
| C18H27O11NO3 | C <sub>18</sub> H <sub>27</sub> NO <sub>14</sub> | ROOR-O-NO <sub>2</sub> | 1 |   | 1 | 1 | 1 | 2 | 1 | -13.8 |
| C18H27O12NO3 | C <sub>18</sub> H <sub>27</sub> NO <sub>15</sub> | ROOR-O-NO <sub>2</sub> |   |   | 1 | 1 | 1 | 3 | 1 | -14.1 |
| C18H27O13NO3 | C <sub>18</sub> H <sub>27</sub> NO <sub>16</sub> | ROOR-O-NO <sub>2</sub> |   |   | 1 | 1 | 1 | 2 | 2 | -14.0 |
| C18H27O14NO3 | C <sub>18</sub> H <sub>27</sub> NO <sub>17</sub> | ROOR-O-NO <sub>2</sub> |   |   |   | 1 | 1 | 3 | 2 | -15.6 |
| C18H27O15NO3 | C <sub>18</sub> H <sub>27</sub> NO <sub>18</sub> | ROOR-O-NO <sub>2</sub> |   |   | 1 | 1 | 1 | 3 | 2 | -16.5 |
| C18H27O16NO3 | C <sub>18</sub> H <sub>27</sub> NO <sub>19</sub> | ROOR-O-NO <sub>2</sub> |   |   |   | 1 | 1 | 4 | 2 | -18.0 |

**Supplementary Table 2b.** List of PRAM<sup>1</sup> species formed when monoterpenes are oxidized by OH. The table includes the species name in PRAM, molecular formula, compound type, functional groups used when estimating their pure liquid saturation vapor pressure ( $p_0$ ) using SIMPOL<sup>5</sup> and their  $p_0$  at 298 K. The peroxy and alkoxy radical functional groups are not listed and were not considered when we calculated  $p_0$ .

| PRAM name    | Molecular formula                               | Type            | Alcohol | Ketone | Nitrate | Endoperoxide | Hydroperoxide | C=C bond | Non-aromatic ring | $\log_{10}(p_0)$ (Pa) at 298 K |
|--------------|-------------------------------------------------|-----------------|---------|--------|---------|--------------|---------------|----------|-------------------|--------------------------------|
| C10H17O3O2   | C <sub>10</sub> H <sub>17</sub> O <sub>5</sub>  | RO <sub>2</sub> | 1       |        |         |              | 1             | 1        | 1                 | -2.2                           |
| C10H17O4O2   | C <sub>10</sub> H <sub>17</sub> O <sub>6</sub>  | RO <sub>2</sub> | 2       |        |         |              | 1             |          | 1                 | -4.2                           |
| C10H17O5O2   | C <sub>10</sub> H <sub>17</sub> O <sub>7</sub>  | RO <sub>2</sub> | 1       |        |         | 1            | 1             |          | 1                 | -2.4                           |
| C10H17O6O2   | C <sub>10</sub> H <sub>17</sub> O <sub>8</sub>  | RO <sub>2</sub> | 2       |        |         | 1            | 1             |          | 1                 | -4.6                           |
| C10H17O7O2   | C <sub>10</sub> H <sub>17</sub> O <sub>9</sub>  | RO <sub>2</sub> | 1       |        |         | 1            | 2             |          | 1                 | -4.9                           |
| C10H17O8O2   | C <sub>10</sub> H <sub>17</sub> O <sub>10</sub> | RO <sub>2</sub> | 2       |        |         | 1            | 2             |          | 1                 | -7.1                           |
| C10H17O3O    | C <sub>10</sub> H <sub>17</sub> O <sub>4</sub>  | RO              | 1       |        |         |              | 1             | 1        | 1                 | -2.2                           |
| C10H17O4O    | C <sub>10</sub> H <sub>17</sub> O <sub>5</sub>  | RO              | 2       |        |         |              | 1             |          | 1                 | -4.2                           |
| C10H17O5O    | C <sub>10</sub> H <sub>17</sub> O <sub>6</sub>  | RO              | 1       |        |         | 1            | 1             |          | 1                 | -2.4                           |
| C10H17O6O    | C <sub>10</sub> H <sub>17</sub> O <sub>7</sub>  | RO              | 2       |        |         | 1            | 1             |          | 1                 | -4.6                           |
| C10H17O7O    | C <sub>10</sub> H <sub>17</sub> O <sub>8</sub>  | RO              | 1       |        |         | 1            | 2             |          | 1                 | -4.9                           |
| C10H16O4iso2 | C <sub>10</sub> H <sub>16</sub> O <sub>4</sub>  | RCHO            | 1       | 1      |         |              | 1             | 1        | 1                 | -3.1                           |
| C10H16O5iso2 | C <sub>10</sub> H <sub>16</sub> O <sub>5</sub>  | RCHO            | 2       | 1      |         |              | 1             |          | 1                 | -5.2                           |
| C10H16O6iso2 | C <sub>10</sub> H <sub>16</sub> O <sub>6</sub>  | RCHO            | 1       | 1      |         | 1            | 1             |          | 1                 | -3.4                           |
| C10H16O7iso2 | C <sub>10</sub> H <sub>16</sub> O <sub>7</sub>  | RCHO            | 2       | 1      |         | 1            | 1             |          | 1                 | -5.6                           |
| C10H16O8iso2 | C <sub>10</sub> H <sub>16</sub> O <sub>8</sub>  | RCHO            | 1       | 1      |         | 1            | 2             |          | 1                 | -5.8                           |
| C10H16O9iso2 | C <sub>10</sub> H <sub>16</sub> O <sub>9</sub>  | RCHO            | 2       | 1      |         | 1            | 2             |          | 1                 | -8.0                           |
| C10H18O4     | C <sub>10</sub> H <sub>18</sub> O <sub>4</sub>  | ROOH or ROH     | 2       |        |         |              | 1             | 1        | 1                 | -4.3                           |
| C10H18O5     | C <sub>10</sub> H <sub>18</sub> O <sub>5</sub>  | ROOH or ROH     | 3       |        |         |              | 1             |          | 1                 | -6.4                           |
| C10H18O6     | C <sub>10</sub> H <sub>18</sub> O <sub>6</sub>  | ROOH or ROH     | 2       |        |         | 1            | 1             |          | 1                 | -4.6                           |

|              |                                                  |                        |   |   |   |   |   |       |
|--------------|--------------------------------------------------|------------------------|---|---|---|---|---|-------|
| C10H18O7     | C <sub>10</sub> H <sub>18</sub> O <sub>7</sub>   | ROOH or ROH            | 3 |   | 1 | 1 | 1 | -6.8  |
| C10H18O8     | C <sub>10</sub> H <sub>18</sub> O <sub>8</sub>   | ROOH or ROH            | 2 |   | 1 | 2 | 1 | -7.1  |
| C10H18O9     | C <sub>10</sub> H <sub>18</sub> O <sub>9</sub>   | ROOH or ROH            | 1 |   | 1 | 3 | 1 | -7.4  |
| C10H18O10    | C <sub>10</sub> H <sub>18</sub> O <sub>10</sub>  | ROOH or ROH            | 2 |   | 1 | 3 | 1 | -9.6  |
| C10H17O3NO3  | C <sub>10</sub> H <sub>17</sub> NO <sub>6</sub>  | R-O-NO <sub>2</sub>    | 1 | 1 |   | 1 | 1 | -4.2  |
| C10H17O4NO3  | C <sub>10</sub> H <sub>17</sub> NO <sub>7</sub>  | R-O-NO <sub>2</sub>    | 2 | 1 |   | 1 | 1 | -6.4  |
| C10H17O5NO3  | C <sub>10</sub> H <sub>17</sub> NO <sub>8</sub>  | R-O-NO <sub>2</sub>    | 1 | 1 | 1 | 1 | 1 | -4.6  |
| C10H17O6NO3  | C <sub>10</sub> H <sub>17</sub> NO <sub>9</sub>  | R-O-NO <sub>2</sub>    | 2 | 1 | 1 | 1 | 1 | -6.8  |
| C10H17O7NO3  | C <sub>10</sub> H <sub>17</sub> NO <sub>10</sub> | R-O-NO <sub>2</sub>    | 1 | 1 | 1 | 2 | 1 | -7.1  |
| C10H17O8NO3  | C <sub>10</sub> H <sub>17</sub> NO <sub>11</sub> | R-O-NO <sub>2</sub>    | 2 | 1 | 1 | 2 | 1 | -9.2  |
| C20H34O6     | C <sub>20</sub> H <sub>34</sub> O <sub>6</sub>   | ROOR                   | 1 | 1 | 1 | 1 | 2 | -7.7  |
| C20H34O7     | C <sub>20</sub> H <sub>34</sub> O <sub>7</sub>   | ROOR                   | 1 | 2 | 1 | 1 | 1 | -8.6  |
| C20H34O8     | C <sub>20</sub> H <sub>34</sub> O <sub>8</sub>   | ROOR                   | 1 | 1 | 2 | 1 | 1 | -8.0  |
| C20H34O9     | C <sub>20</sub> H <sub>34</sub> O <sub>9</sub>   | ROOR                   | 2 | 1 | 2 | 1 | 1 | -10.2 |
| C20H34O10    | C <sub>20</sub> H <sub>34</sub> O <sub>10</sub>  | ROOR                   | 1 | 1 | 2 | 2 | 1 | -10.5 |
| C20H34O11    | C <sub>20</sub> H <sub>34</sub> O <sub>11</sub>  | ROOR                   | 2 | 1 | 2 | 2 | 1 | -12.6 |
| C20H34O12    | C <sub>20</sub> H <sub>34</sub> O <sub>12</sub>  | ROOR                   | 3 | 1 | 2 | 2 | 1 | -14.8 |
| C20H34O13    | C <sub>20</sub> H <sub>34</sub> O <sub>13</sub>  | ROOR                   | 2 | 1 | 2 | 3 | 1 | -15.1 |
| C20H35O5NO3  | C <sub>20</sub> H <sub>35</sub> NO <sub>8</sub>  | ROOR-O-NO <sub>2</sub> |   | 1 | 1 | 1 | 1 | -7.6  |
| C20H35O6NO3  | C <sub>20</sub> H <sub>35</sub> NO <sub>9</sub>  | ROOR-O-NO <sub>2</sub> | 1 | 1 | 1 | 1 | 1 | -9.8  |
| C20H35O7NO3  | C <sub>20</sub> H <sub>35</sub> NO <sub>10</sub> | ROOR-O-NO <sub>2</sub> | 1 | 2 | 1 | 1 | 1 | -10.7 |
| C20H35O8NO3  | C <sub>20</sub> H <sub>35</sub> NO <sub>11</sub> | ROOR-O-NO <sub>2</sub> | 1 | 1 | 1 | 2 | 1 | -10.2 |
| C20H35O9NO3  | C <sub>20</sub> H <sub>35</sub> NO <sub>12</sub> | ROOR-O-NO <sub>2</sub> | 2 | 1 | 1 | 2 | 1 | -12.4 |
| C20H35O10NO3 | C <sub>20</sub> H <sub>35</sub> NO <sub>13</sub> | ROOR-O-NO <sub>2</sub> | 1 | 1 | 1 | 2 | 2 | -12.6 |
| C20H35O11NO3 | C <sub>20</sub> H <sub>35</sub> NO <sub>14</sub> | ROOR-O-NO <sub>2</sub> | 2 | 1 | 1 | 2 | 2 | -14.8 |
| C19H32O6     | C <sub>19</sub> H <sub>32</sub> O <sub>6</sub>   | ROOR                   | 1 | 1 | 1 | 1 | 2 | -7.3  |
| C19H32O7     | C <sub>19</sub> H <sub>32</sub> O <sub>7</sub>   | ROOR                   | 1 | 2 | 1 | 1 | 1 | -8.1  |
| C19H32O8     | C <sub>19</sub> H <sub>32</sub> O <sub>8</sub>   | ROOR                   | 1 | 1 | 2 | 1 | 1 | -7.6  |
| C19H32O9     | C <sub>19</sub> H <sub>32</sub> O <sub>9</sub>   | ROOR                   | 2 | 1 | 2 | 1 | 1 | -9.8  |
| C19H32O10    | C <sub>19</sub> H <sub>32</sub> O <sub>10</sub>  | ROOR                   | 1 | 1 | 2 | 2 | 1 | -10.0 |
| C19H32O11    | C <sub>19</sub> H <sub>32</sub> O <sub>11</sub>  | ROOR                   | 2 | 1 | 2 | 2 | 1 | -12.2 |
| C19H32O12    | C <sub>19</sub> H <sub>32</sub> O <sub>12</sub>  | ROOR                   | 3 | 1 | 2 | 2 | 1 | -14.4 |
| C19H32O13    | C <sub>19</sub> H <sub>32</sub> O <sub>13</sub>  | ROOR                   | 2 | 1 | 2 | 3 | 1 | -14.7 |
| C19H32O14    | C <sub>19</sub> H <sub>32</sub> O <sub>14</sub>  | ROOR                   | 3 | 1 | 2 | 3 | 1 | -16.8 |
| C19H33O6NO3  | C <sub>19</sub> H <sub>33</sub> NO <sub>9</sub>  | ROOR-O-NO <sub>2</sub> | 1 | 1 | 1 | 1 | 1 | -9.4  |
| C19H33O7NO3  | C <sub>19</sub> H <sub>33</sub> NO <sub>10</sub> | ROOR-O-NO <sub>2</sub> | 1 | 2 | 1 | 1 | 1 | -10.3 |
| C19H33O8NO3  | C <sub>19</sub> H <sub>33</sub> NO <sub>11</sub> | ROOR-O-NO <sub>2</sub> | 1 | 1 | 1 | 2 | 1 | -9.8  |
| C19H33O9NO3  | C <sub>19</sub> H <sub>33</sub> NO <sub>12</sub> | ROOR-O-NO <sub>2</sub> | 2 | 1 | 1 | 2 | 1 | -12.0 |
| C19H33O10NO3 | C <sub>19</sub> H <sub>33</sub> NO <sub>13</sub> | ROOR-O-NO <sub>2</sub> | 1 | 1 | 1 | 2 | 2 | -12.2 |
| C19H33O11NO3 | C <sub>19</sub> H <sub>33</sub> NO <sub>14</sub> | ROOR-O-NO <sub>2</sub> | 2 | 1 | 1 | 2 | 2 | -14.4 |
| C18H30O5     | C <sub>18</sub> H <sub>30</sub> O <sub>5</sub>   | ROOR                   | 1 |   | 1 | 1 | 2 | -5.9  |
| C18H30O6     | C <sub>18</sub> H <sub>30</sub> O <sub>6</sub>   | ROOR                   | 1 | 1 | 1 | 1 | 2 | -6.9  |

|              |                                                  |                            |   |   |   |   |   |       |
|--------------|--------------------------------------------------|----------------------------|---|---|---|---|---|-------|
| C18H30O7     | C <sub>18</sub> H <sub>30</sub> O <sub>7</sub>   | ROOR                       | 1 | 2 | 1 | 1 | 1 | -7.7  |
| C18H30O8     | C <sub>18</sub> H <sub>30</sub> O <sub>8</sub>   | ROOR                       | 1 | 1 | 2 | 1 | 1 | -7.2  |
| C18H30O9     | C <sub>18</sub> H <sub>30</sub> O <sub>9</sub>   | ROOR                       | 2 | 1 | 2 | 1 | 1 | -9.3  |
| C18H30O10    | C <sub>18</sub> H <sub>30</sub> O <sub>10</sub>  | ROOR                       | 1 | 1 | 2 | 2 | 1 | -9.6  |
| C18H30O11    | C <sub>18</sub> H <sub>30</sub> O <sub>11</sub>  | ROOR                       | 2 | 1 | 2 | 2 | 1 | -11.8 |
| C18H30O12    | C <sub>18</sub> H <sub>30</sub> O <sub>12</sub>  | ROOR                       | 3 | 1 | 2 | 2 | 1 | -14.0 |
| C18H30O13    | C <sub>18</sub> H <sub>30</sub> O <sub>13</sub>  | ROOR                       | 2 | 1 | 2 | 3 | 1 | -14.2 |
| C18H30O14    | C <sub>18</sub> H <sub>30</sub> O <sub>14</sub>  | ROOR                       | 3 | 1 | 2 | 3 | 1 | -16.4 |
| C18H31O7NO3  | C <sub>18</sub> H <sub>31</sub> NO <sub>10</sub> | ROOR-<br>O-NO <sub>2</sub> | 1 | 2 | 1 | 1 | 1 | -9.9  |
| C18H31O8NO3  | C <sub>18</sub> H <sub>31</sub> NO <sub>11</sub> | ROOR-<br>O-NO <sub>2</sub> | 1 | 1 | 1 | 2 | 1 | -9.3  |
| C18H31O9NO3  | C <sub>18</sub> H <sub>31</sub> NO <sub>12</sub> | ROOR-<br>O-NO <sub>2</sub> | 2 | 1 | 1 | 2 | 1 | -11.5 |
| C18H31O10NO3 | C <sub>18</sub> H <sub>31</sub> NO <sub>13</sub> | ROOR-<br>O-NO <sub>2</sub> | 1 | 1 | 1 | 2 | 2 | -11.8 |
| C18H31O11NO3 | C <sub>18</sub> H <sub>31</sub> NO <sub>14</sub> | ROOR-<br>O-NO <sub>2</sub> | 2 | 1 | 1 | 2 | 2 | -14.0 |
| C18H31O12NO3 | C <sub>18</sub> H <sub>31</sub> NO <sub>15</sub> | ROOR-<br>O-NO <sub>2</sub> | 1 | 1 | 1 | 2 | 3 | -14.2 |

**Supplementary Table 3.** List of species from MCMv3.3.1 which has a specific role in the PRAM mechanism.

| Name             | Role in PRAM                                                                                                                                                                                                                                                                                                         |
|------------------|----------------------------------------------------------------------------------------------------------------------------------------------------------------------------------------------------------------------------------------------------------------------------------------------------------------------|
| NO               | React with the autoxidation RO <sub>2</sub> species and form RO, R-O-NO <sub>2</sub> , RCHO species or causes fragmentation of the C10 RO <sub>2</sub> species.                                                                                                                                                      |
| O <sub>3</sub>   | React with monoterpenes containing endocyclic double bonds and form the Criegee intermediates (CI) APINOOA and LIMOOA that decomposes and form the RO <sub>2</sub> (C10H15O2O2) that initializes the autoxidation mechanism.                                                                                         |
| HO <sub>2</sub>  | React with the autoxidation RO <sub>2</sub> species and form ROOH.                                                                                                                                                                                                                                                   |
| OH               | React with the monoterpenes and form RO <sub>2</sub> species that can undergo autoxidation. Is also formed when the CI from the ozonolysis of monoterpenes is decomposing and form RO <sub>2</sub> species that initialize the autoxidation chain, and upon unimolecular termination of the RO <sub>2</sub> in PRAM. |
| <i>α</i> -pinene | Small branching ratio of the RO <sub>2</sub> formed during the OH oxidation of <i>α</i> -pinene are assumed to undergo autoxidation.                                                                                                                                                                                 |
| <i>β</i> -pinene | Small branching ratio of the RO <sub>2</sub> formed during the OH oxidation of <i>β</i> -pinene are assumed to undergo autoxidation.                                                                                                                                                                                 |
| Limonene         | Small branching ratio of the RO <sub>2</sub> formed during the OH oxidation of limonene are assumed to undergo autoxidation.                                                                                                                                                                                         |
| Carene           | After the initial oxidation with O <sub>3</sub> carene is assumed to form the same CI as <i>α</i> -pinene and thus form HOM with identical yields and composition as <i>α</i> -pinene.                                                                                                                               |
| APINOOA          | CI formed from the <i>α</i> -pinene + O <sub>3</sub> reaction. Is also assumed to be formed from the carene + O <sub>3</sub> reaction. This CI is assumed to decompose and form the initial RO <sub>2</sub> that initializes the autoxidation mechanism.                                                             |
| LIMOOA           | CI formed from the limonene + O <sub>3</sub> reaction. This CI is assumed to decompose and form the initial RO <sub>2</sub> that initializes the autoxidation mechanism.                                                                                                                                             |
| C107O2           | Reactions with other RO <sub>2</sub> from the MCM chemistry. This leads to ring-opening of the formed cyclic alkoxy radicals (C10H15O2O and C107O, R1152-R1154 Supplementary Table 4) and formation of a new RO <sub>2</sub> in PRAM (C10H15O3O2, R20 Supplementary Table 4).                                        |
| C717O2           | Assumed fragmentation product from the RO <sub>2</sub> + NO reactions                                                                                                                                                                                                                                                |
| CH3COCH3         | Assumed fragmentation product from the RO <sub>2</sub> + NO reactions                                                                                                                                                                                                                                                |

In addition to the species listed in Supplementary Table 3, all MCM RO<sub>2</sub> formed from oxidation of *α*-pinene, *β*-pinene and limonene with 10, 9 or 8 carbon atoms, in total 94 species, are involved in RO<sub>2</sub> + RO<sub>2</sub> reactions that lead to formation of closed shell dimers in PRAM (R85-R1118 and R1193-R1756)

**Supplementary Table 4.** List of all reactions and their reaction rates in PRAM<sup>1</sup>

If not others specified the unit of the reaction rates is  $\text{cm}^3 \text{molec}^{-1} \text{s}^{-1}$

PRAM applies the simple rate coefficients KDEC, KRO2NO and KRO2HO2 from MCMv3.3.1:

$KDEC = 1E6 \text{ s}^{-1}$  (Simplified rate coefficient for unimolecular reactions)

$KRO2NO = 2.7E-12 * EXP(360/T) \text{ cm}^3 \text{ molec}^{-1} \text{ s}^{-1}$  (Used for the reactions between peroxy radicals and NO)

$KRO2HO2 = 2.91E-13 * EXP(1300/T) \text{ cm}^3 \text{ molec}^{-1} \text{ s}^{-1}$  (Used for the reactions between peroxy radicals and HO<sub>2</sub>)

Reaction 1-6 and 11-1154 describes the autoxidation and formation of HOM after ozonolysis of  $\alpha$ -pinene, limonene and carene.

Reaction 7-10 and 1155-1773 describes the autoxidation and formation of HOM after OH oxidation of  $\alpha$ -pinene,  $\beta$ -pinene, limonene and carene. For the RO<sub>2</sub> + RO<sub>2</sub> reactions that lead to new closed shell HOM monomers and alkoxy radicals (R1119-R1151 and R1757-R1773 in Supplementary Table 4) we use the same simplified approach as in MCM, where each RO<sub>2</sub> is assumed to react with all other peroxy radicals from MCM (the so called RO<sub>2</sub> pool, denoted RO2) at a single collective rate<sup>6</sup>.

| Reaction                                          | Reaction rate              | Comment / ref.   |
|---------------------------------------------------|----------------------------|------------------|
| APINENE + O <sub>3</sub> → APINOOA                | 8.05E-16*EXP(-640/T)*0.6   | MCMv3.3.1        |
| APINENE + O <sub>3</sub> → APINOOB                | 8.05E-16*EXP(-640/T)*0.4   | MCMv3.3.1        |
| LIMONENE + O <sub>3</sub> → LIMOOA                | 2.80E-15*EXP(-770/T)*0.730 | MCMv3.3.1        |
| LIMONENE + O <sub>3</sub> → LIMOOB                | 2.80E-15*EXP(-770/T)*0.27  | MCMv3.3.1        |
| CARENE + O <sub>3</sub> → APINOOA                 | 3.70D-17*0.6               | See motiv. above |
| CARENE + O <sub>3</sub> → APINOOB                 | 3.70D-17*0.4               | See motiv. above |
| APINENE + OH → Products                           | 1.2E-11*EXP(440/T)         | MCMv3.3.1        |
| BPINENE + OH → Products                           | 2.38E-11*EXP(357/T)        | MCMv3.3.1        |
| LIMONENE + OH → Products                          | 4.28E-11*EXP(401/T)        | MCMv3.3.1        |
| CARENE + OH → Products (same as $\alpha$ -pinene) | 1.6E-11*EXP(500/T)         | See motiv. above |

**Initial Criegee intermediate unimolecular reactions to peroxy radicals via the vinylhydroperoxide pathway<sup>5</sup> which continue to react according to the original MCMv3.3.1 mechanism (R1-R2, R4-R5) or initialize the peroxy radical autoxidation in PRAM (R3 and R6)**

|                              |            |              |
|------------------------------|------------|--------------|
| 1. APINOOA → C107O2 + OH     | KDEC*0.495 | To MCM chem. |
| 2. APINOOA → C109O2 + OH     | KDEC*0.405 | To MCM chem. |
| 3. APINOOA → C10H15O2O2 + OH | KDEC*0.10  | To PRAM      |
| 4. LIMOOA → LIMALAO2 + OH    | KDEC*0.35  | To MCM chem. |
| 5. LIMOOA → LIMALBO2 + OH    | KDEC*0.35  | To MCM chem. |
| 6. LIMOOA → C10H15O2O2 + OH  | KDEC*0.30  | To PRAM      |

**Lumped reactions describing the initial reactions between a monoterpene (MT) and OH forming a RO<sub>2</sub> with 3 oxygen atoms (C<sub>10</sub>H<sub>17</sub>OO<sub>2</sub>) that rapidly undergo a first intramolecular hydrogen shift and O<sub>2</sub> addition and form a new RO<sub>2</sub> with 5 oxygen atoms (C<sub>10</sub>H<sub>17</sub>O<sub>3</sub>O<sub>2</sub>).**

MT + OH → C<sub>10</sub>H<sub>17</sub>OO<sub>2</sub>

C<sub>10</sub>H<sub>17</sub>OO<sub>2</sub> + O<sub>2</sub> → C<sub>10</sub>H<sub>17</sub>O<sub>3</sub>O<sub>2</sub> (Fast)

|                               |                          |         |
|-------------------------------|--------------------------|---------|
| 7. APINENE + OH → C10H17O3O2  | 0.025*1.2E-11*EXP(440/T) | To PRAM |
| 8. BPINENE + OH → C10H17O3O2  | 0.01*2.38E-11*EXP(357/T) | To PRAM |
| 9. LIMONENE + OH → C10H17O3O2 | 0.01*4.28E-11*EXP(401/T) | To PRAM |
| 10. CARENE + OH → C10H17O3O2  | 0.025*1.6E-11*EXP(500/T) | To PRAM |

**Peroxy radical autoxidation and HOM formation after O<sub>3</sub> oxidation of monoterpenes (R11-R1154)**

**Autoxidation reaction rates (H-shifts + O<sub>2</sub>)**

|                               |                      |                      |
|-------------------------------|----------------------|----------------------|
| 11. C10H15O2O2 → C10H15O4O2   | 1.2E17*EXP(-12077/T) | Unit s <sup>-1</sup> |
| 12. C10H15O3O2 → C10H15O5O2   | 1.2E18*EXP(-12077/T) | Unit s <sup>-1</sup> |
| 13. C10H15O4O2 → C10H15O6O2   | 1.2E18*EXP(-12077/T) | Unit s <sup>-1</sup> |
| 14. C10H15O5O2 → C10H15O7O2   | 6E17*EXP(-12077/T)   | Unit s <sup>-1</sup> |
| 15. C10H15O6O2 → C10H15O8O2   | 2E17*EXP(-12077/T)   | Unit s <sup>-1</sup> |
| 16. C10H15O7O2 → C10H15O9O2   | 1.2E17*EXP(-12077/T) | Unit s <sup>-1</sup> |
| 17. C10H15O8O2 → C10H15O10O2  | 1.2E17*EXP(-12077/T) | Unit s <sup>-1</sup> |
| 18. C10H15O9O2 → C10H15O11O2  | 1.2E16*EXP(-12077/T) | Unit s <sup>-1</sup> |
| 19. C10H15O10O2 → C10H15O12O2 | 0.0                  | Unit s <sup>-1</sup> |

**Isomerization of alkoxy radicals (RO) followed by reaction with O<sub>2</sub> to make new peroxy radicals:**

RO· → ·ROH

·ROH + O<sub>2</sub> → RO<sub>2</sub>·

Net: RO· + O<sub>2</sub> → RO<sub>2</sub>·

|                              |      |                      |
|------------------------------|------|----------------------|
| 20. C10H15O2O → C10H15O3O2   | KDEC | Unit s <sup>-1</sup> |
| 21. C10H15O3O → C10H15O4O2   | KDEC | Unit s <sup>-1</sup> |
| 22. C10H15O4O → C10H15O5O2   | KDEC | Unit s <sup>-1</sup> |
| 23. C10H15O5O → C10H15O6O2   | KDEC | Unit s <sup>-1</sup> |
| 24. C10H15O6O → C10H15O7O2   | KDEC | Unit s <sup>-1</sup> |
| 25. C10H15O7O → C10H15O8O2   | KDEC | Unit s <sup>-1</sup> |
| 26. C10H15O8O → C10H15O9O2   | KDEC | Unit s <sup>-1</sup> |
| 27. C10H15O9O → C10H15O10O2  | KDEC | Unit s <sup>-1</sup> |
| 28. C10H15O10O → C10H15O11O2 | KDEC | Unit s <sup>-1</sup> |
| 29. C10H15O11O → C10H15O12O2 | KDEC | Unit s <sup>-1</sup> |

**Peroxy radicals reacting with NO and forming an alkoxy radical and NO<sub>2</sub> (RO<sub>2</sub> + NO → RO + NO<sub>2</sub>)**

The rate for the reactions between autoxidation RO<sub>2</sub> and NO was set to the same values used in MCMv3.3.1 (KRO2NO)

|                                                   |            |
|---------------------------------------------------|------------|
| 30. C10H15O2O2 + NO → C10H15O2O + NO <sub>2</sub> | KRO2NO*1.0 |
|---------------------------------------------------|------------|

|                                                     |             |
|-----------------------------------------------------|-------------|
| 31. C10H15O3O2 + NO → C10H15O3O + NO <sub>2</sub>   | KRO2NO*1.0  |
| 32. C10H15O4O2 + NO → C10H15O4O + NO <sub>2</sub>   | KRO2NO*1.0  |
| 33. C10H15O5O2 + NO → C10H15O5O + NO <sub>2</sub>   | KRO2NO*0.9  |
| 34. C10H15O6O2 + NO → C10H15O6O + NO <sub>2</sub>   | KRO2NO*0.85 |
| 35. C10H15O7O2 + NO → C10H15O7O + NO <sub>2</sub>   | KRO2NO*0.8  |
| 36. C10H15O8O2 + NO → C10H15O8O + NO <sub>2</sub>   | KRO2NO*0.6  |
| 37. C10H15O9O2 + NO → C10H15O9O + NO <sub>2</sub>   | KRO2NO*0.5  |
| 38. C10H15O10O2 + NO → C10H15O10O + NO <sub>2</sub> | KRO2NO*0.3  |
| 39. C10H15O11O2 + NO → C10H15O11O + NO <sub>2</sub> | 0.0         |
| 40. C10H15O12O2 + NO → C10H15O12O + NO <sub>2</sub> | 0.0         |

**Lumped reactions describing the fragmentation of autoxidation products when they react with NO (RO<sub>2</sub> + NO → RO + NO<sub>2</sub>) followed by fast fragmentation of the formed alkoxy radicals).**

The fragmentation products are assumed to be the MCM compounds C717O2 (a peroxy radical) and CH3COCH3 (acetone) irrespectively of which autoxidation peroxy radical that react with NO. This is a simplification that violates the mass balance for O atoms but not for the N and C atoms.

|                                                            |             |
|------------------------------------------------------------|-------------|
| 41. C10H15O2O2 + NO → C717O2 + CH3COCH3 + NO <sub>2</sub>  | 0.0         |
| 42. C10H15O3O2 + NO → C717O2 + CH3COCH3+NO <sub>2</sub>    | 0.0         |
| 43. C10H15O4O2 + NO → C717O2 + CH3COCH3 + NO <sub>2</sub>  | 0.0         |
| 44. C10H15O5O2 + NO → C717O2 + CH3COCH3+NO <sub>2</sub>    | KRO2NO*0.04 |
| 45. C10H15O6O2 + NO → C717O2 + CH3COCH3 + NO <sub>2</sub>  | KRO2NO*0.06 |
| 46. C10H15O7O2 + NO → C717O2 + CH3COCH3+NO <sub>2</sub>    | KRO2NO*0.08 |
| 47. C10H15O8O2 + NO → C717O2 + CH3COCH3 + NO <sub>2</sub>  | KRO2NO*0.16 |
| 48. C10H15O9O2 + NO → C717O2 + CH3COCH3+NO <sub>2</sub>    | KRO2NO*0.20 |
| 49. C10H15O10O2 + NO → C717O2 + CH3COCH3 + NO <sub>2</sub> | KRO2NO*0.28 |
| 50. C10H15O11O2 + NO → C717O2 + CH3COCH3+NO <sub>2</sub>   | KRO2NO*0.40 |
| 51. C10H15O12O2 + NO → C717O2 + CH3COCH3+NO <sub>2</sub>   | KRO2NO*0.40 |

**Peroxy radicals reacting with NO forming monomers with an additional carbonyl group:**

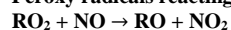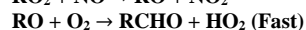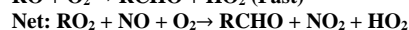

|                                                                      |              |
|----------------------------------------------------------------------|--------------|
| 52. C10H15O2O2 + NO → C10H14O3 + NO <sub>2</sub> + HO <sub>2</sub>   | 0.0          |
| 53. C10H15O3O2 + NO → C10H14O4 + NO <sub>2</sub> + HO <sub>2</sub>   | 0.0          |
| 54. C10H15O4O2 + NO → C10H14O5 + NO <sub>2</sub> + HO <sub>2</sub>   | 0.0          |
| 55. C10H15O5O2 + NO → C10H14O6 + NO <sub>2</sub> + HO <sub>2</sub>   | KRO2NO*0.042 |
| 56. C10H15O6O2 + NO → C10H14O7 + NO <sub>2</sub> + HO <sub>2</sub>   | KRO2NO*0.063 |
| 57. C10H15O7O2 + NO → C10H14O8 + NO <sub>2</sub> + HO <sub>2</sub>   | KRO2NO*0.084 |
| 58. C10H15O8O2 + NO → C10H14O9 + NO <sub>2</sub> + HO <sub>2</sub>   | KRO2NO*0.168 |
| 59. C10H15O9O2 + NO → C10H14O10 + NO <sub>2</sub> + HO <sub>2</sub>  | KRO2NO*0.210 |
| 60. C10H15O10O2 + NO → C10H14O11 + NO <sub>2</sub> + HO <sub>2</sub> | KRO2NO*0.294 |
| 61. C10H15O11O2 + NO → C10H14O12 + NO <sub>2</sub> + HO <sub>2</sub> | KRO2NO*0.420 |
| 62. C10H15O12O2 + NO → C10H14O13 + NO <sub>2</sub> + HO <sub>2</sub> | KRO2NO*0.420 |

**Peroxy radicals reacting with NO forming compounds with a nitrate functional group (RO<sub>2</sub> + NO → RNO<sub>3</sub>)**

|                                     |              |
|-------------------------------------|--------------|
| 63. C10H15O2O2 + NO → C10H15O2NO3   | 0.0          |
| 64. C10H15O3O2 + NO → C10H15O3NO3   | 0.0          |
| 65. C10H15O4O2 + NO → C10H15O4NO3   | 0.0          |
| 66. C10H15O5O2 + NO → C10H15O5NO3   | KRO2NO*0.018 |
| 67. C10H15O6O2 + NO → C10H15O6NO3   | KRO2NO*0.027 |
| 68. C10H15O7O2 + NO → C10H15O7NO3   | KRO2NO*0.036 |
| 69. C10H15O8O2 + NO → C10H15O8NO3   | KRO2NO*0.072 |
| 70. C10H15O9O2 + NO → C10H15O9NO3   | KRO2NO*0.090 |
| 71. C10H15O10O2 + NO → C10H15O10NO3 | KRO2NO*0.126 |
| 72. C10H15O11O2 + NO → C10H15O11NO3 | KRO2NO*0.180 |
| 73. C10H15O12O2 + NO → C10H15O12NO3 | KRO2NO*0.180 |

**Peroxy radicals reacting with HO<sub>2</sub> forming compounds with an hydrogen peroxide functional group (RO<sub>2</sub> + HO<sub>2</sub> → ROOH + O<sub>2</sub>)**

|                                                             |         |
|-------------------------------------------------------------|---------|
| 74. C10H15O2O2 + HO <sub>2</sub> → C10H16O4 <sub>iso1</sub> | KRO2HO2 |
| 75. C10H15O3O2 + HO <sub>2</sub> → C10H16O5 <sub>iso1</sub> | KRO2HO2 |
| 76. C10H15O4O2 + HO <sub>2</sub> → C10H16O6 <sub>iso1</sub> | KRO2HO2 |
| 77. C10H15O5O2 + HO <sub>2</sub> → C10H16O7 <sub>iso1</sub> | KRO2HO2 |
| 78. C10H15O6O2 + HO <sub>2</sub> → C10H16O8 <sub>iso1</sub> | KRO2HO2 |
| 79. C10H15O7O2 + HO <sub>2</sub> → C10H16O9 <sub>iso1</sub> | KRO2HO2 |
| 80. C10H15O8O2 + HO <sub>2</sub> → C10H16O10                | KRO2HO2 |
| 81. C10H15O9O2 + HO <sub>2</sub> → C10H16O11                | KRO2HO2 |
| 82. C10H15O10O2 + HO <sub>2</sub> → C10H16O12               | KRO2HO2 |
| 83. C10H15O11O2 + HO <sub>2</sub> → C10H16O13               | KRO2HO2 |
| 84. C10H15O12O2 + HO <sub>2</sub> → C10H16O14               | KRO2HO2 |

**Peroxy radicals reacting with other peroxy radicals forming dimers (RO<sub>2</sub> + RO<sub>2</sub> → ROOR + O<sub>2</sub>)**

|                                                             |       |
|-------------------------------------------------------------|-------|
| 85. APINA <sub>2</sub> + C10H15O2O <sub>2</sub> → C20H30O5  | 1E-13 |
| 86. APINBO <sub>2</sub> + C10H15O2O <sub>2</sub> → C20H30O5 | 1E-13 |
| 87. APINCO <sub>2</sub> + C10H15O2O <sub>2</sub> → C20H30O5 | 1E-13 |

|                                          |       |                                       |
|------------------------------------------|-------|---------------------------------------|
| 88. C107O2 + C10H15O2O2 → C20H30O6       | 1E-13 |                                       |
| 89. C109O2 + C10H15O2O2 → C20H30O6       | 1E-13 |                                       |
| 90. C106O2 + C10H15O2O2 → C20H30O7       | 1E-13 |                                       |
| 91. C920CO3 + C10H15O2O2 → C20H30O7      | 1E-13 |                                       |
| 92. C108O2 + C10H15O2O2 → C20H30O7       | 1E-13 |                                       |
| 93. PINALO2 + C10H15O2O2 → C20H30O6      | 1E-13 |                                       |
| 94. C96CO3 + C10H15O2O2 → C20H30O6       | 1E-13 |                                       |
| 95. C923CO3 + C10H15O2O2 → C20H30O6      | 1E-13 |                                       |
| 96. LMAO2 + C10H15O2O2 → C20H30O5        | 1E-13 |                                       |
| 97. LIMALBO2 + C10H15O2O2 → C20H30O6     | 1E-13 |                                       |
| 98. LIMCO2 + C10H15O2O2 → C20H30O5       | 1E-13 |                                       |
| 99. LIMALO2 + C10H15O2O2 → C20H30O6      | 1E-13 |                                       |
| 100. LIMBO2 + C10H15O2O2 → C20H30O5      | 1E-13 |                                       |
| 101. LIMALAO2 + C10H15O2O2 → C20H30O6    | 1E-13 |                                       |
| 102. BPINAO2 + C10H15O2O2 → C20H30O5     | 1E-13 |                                       |
| 103. BPINBO2 + C10H15O2O2 → C20H30O5     | 1E-13 |                                       |
| 104. BPINCO2 + C10H15O2O2 → C20H30O5     | 1E-13 |                                       |
| 105. C918CO3 + C10H15O2O2 → C20H30O6     | 1E-13 |                                       |
| 106. NAPINAO2 + C10H15O2O2 → C20H31O4NO3 | 1E-13 | HOM dimers containing NO <sub>3</sub> |
| 107. NAPINBO2 + C10H15O2O2 → C20H31O4NO3 | 1E-13 | HOM dimers containing NO <sub>3</sub> |
| 108. NC102O2 + C10H15O2O2 → C20H31O5NO3  | 1E-13 | HOM dimers containing NO <sub>3</sub> |
| 109. NC101O2 + C10H15O2O2 → C20H31O5NO3  | 1E-13 | HOM dimers containing NO <sub>3</sub> |
| 110. NLIMO2 + C10H15O2O2 → C20H31O4NO3   | 1E-13 | HOM dimers containing NO <sub>3</sub> |
| 111. NLIMALO2 + C10H15O2O2 → C20H31O5NO3 | 1E-13 | HOM dimers containing NO <sub>3</sub> |
| 112. NC91CO3 + C10H15O2O2 → C20H31O5NO3  | 1E-13 | HOM dimers containing NO <sub>3</sub> |
| 113. NBPINAO2 + C10H15O2O2 → C20H31O4NO3 | 1E-13 | HOM dimers containing NO <sub>3</sub> |
| 114. NBPINBO2 + C10H15O2O2 → C20H31O4NO3 | 1E-13 | HOM dimers containing NO <sub>3</sub> |
|                                          |       |                                       |
| 115. C96O2 + C10H15O2O2 → C19H28O5       | 1E-13 |                                       |
| 116. C89CO3 + C10H15O2O2 → C19H28O6      | 1E-13 |                                       |
| 117. C920O2 + C10H15O2O2 → C19H28O6      | 1E-13 |                                       |
| 118. C97O2 + C10H15O2O2 → C19H28O6       | 1E-13 |                                       |
| 119. C85CO3 + C10H15O2O2 → C19H28O6      | 1E-13 |                                       |
| 120. C811CO3 + C10H15O2O2 → C19H28O7     | 1E-13 |                                       |
| 121. C921O2 + C10H15O2O2 → C19H28O7      | 1E-13 |                                       |
| 122. C98O2 + C10H15O2O2 → C19H28O7       | 1E-13 |                                       |
| 123. C922O2+ C10H15O2O2 → C19H28O8       | 1E-13 |                                       |
| 124. C923O2 + C10H15O2O2 → C19H28O5      | 1E-13 |                                       |
| 125. C924O2 + C10H15O2O2 → C19H28O6      | 1E-13 |                                       |
| 126. C816CO3 + C10H15O2O2 → C19H28O6     | 1E-13 |                                       |
| 127. NORLIMO2 + C10H15O2O2 → C19H28O7    | 1E-13 |                                       |
| 128. LMKAO2 + C10H15O2O2 → C19H28O6      | 1E-13 |                                       |
| 129. LMKBO2 + C10H15O2O2 → C19H28O6      | 1E-13 |                                       |
| 130. C926O2 + C10H15O2O2 → C19H28O7      | 1E-13 |                                       |
| 131. C817CO3 + C10H15O2O2 → C19H28O7     | 1E-13 |                                       |
| 132. LMLKAO2 + C10H15O2O2 → C19H28O7     | 1E-13 |                                       |
| 133. LMLKBO2 + C10H15O2O2 → C19H28O7     | 1E-13 |                                       |
| 134. C823CO3 + C10H15O2O2 → C19H28O7     | 1E-13 |                                       |
| 135. C925O2 + C10H15O2O2 → C19H28O8      | 1E-13 |                                       |
| 136. NOPINAO2+ C10H15O2O2 → C19H28O5     | 1E-13 |                                       |
| 137. NOPINBO2+ C10H15O2O2 → C19H28O5     | 1E-13 |                                       |
| 138. NOPINCO2+ C10H15O2O2 → C19H28O5     | 1E-13 |                                       |
| 139. NOPINDO2+ C10H15O2O2 → C19H28O5     | 1E-13 |                                       |
| 140. C918O2+ C10H15O2O2 → C19H28O6       | 1E-13 |                                       |
| 141. C9DCO2+ C10H15O2O2 → C19H28O6       | 1E-13 |                                       |
| 142. C915O2+ C10H15O2O2 → C19H28O6       | 1E-13 |                                       |
| 143. C917O2+ C10H15O2O2 → C19H28O6       | 1E-13 |                                       |
| 144. C919O2+ C10H15O2O2 → C19H28O7       | 1E-13 |                                       |
| 145. C914O2+ C10H15O2O2 → C19H28O7       | 1E-13 |                                       |
| 146. C916O2+ C10H15O2O2 → C19H28O7       | 1E-13 |                                       |
| 147. C88CO3+ C10H15O2O2 → C19H28O7       | 1E-13 |                                       |
| 148. C87CO3+ C10H15O2O2 → C19H28O8       | 1E-13 |                                       |
| 149. C822CO3+ C10H15O2O2 → C19H28O6      | 1E-13 |                                       |
| 150. NLMKAO2+ C10H15O2O2 → C19H29O5NO3   | 1E-13 |                                       |
|                                          |       |                                       |
| 151. C85O2 + C10H15O2O2 → C18H26O5       | 1E-13 |                                       |
| 152. C89O2 + C10H15O2O2 → C18H26O5       | 1E-13 |                                       |
| 153. C86O2 + C10H15O2O2 → C18H26O6       | 1E-13 |                                       |
| 154. C811O2 + C10H15O2O2 → C18H26O6      | 1E-13 |                                       |
| 155. C810O2 + C10H15O2O2 → C18H26O6      | 1E-13 |                                       |
| 156. C812O2 + C10H15O2O2 → C18H26O7      | 1E-13 |                                       |
| 157. C813O2 + C10H15O2O2 → C18H26O5      | 1E-13 |                                       |
| 158. C729CO3 + C10H15O2O2 → C18H26O6     | 1E-13 |                                       |
| 159. C816O2 + C10H15O2O2 → C18H26O5      | 1E-13 |                                       |

|                                          |       |                                       |
|------------------------------------------|-------|---------------------------------------|
| 160. C817O2 + C10H15O2O2 → C18H26O6      | 1E-13 |                                       |
| 161. C826O2 + C10H15O2O2 → C18H26O7      | 1E-13 |                                       |
| 162. C822O2 + C10H15O2O2 → C18H26O5      | 1E-13 |                                       |
| 163. C818O2 + C10H15O2O2 → C18H26O7      | 1E-13 |                                       |
| 164. C823O2 + C10H15O2O2 → C18H26O6      | 1E-13 |                                       |
| 165. C819O2 + C10H15O2O2 → C18H26O7      | 1E-13 |                                       |
| 166. C727CO3 + C10H15O2O2 → C18H26O7     | 1E-13 |                                       |
| 167. C731CO3 + C10H15O2O2 → C18H26O7     | 1E-13 |                                       |
| 168. C824O2 + C10H15O2O2 → C18H26O6      | 1E-13 |                                       |
| 169. C820O2 + C10H15O2O2 → C18H26O8      | 1E-13 |                                       |
| 170. C825O2 + C10H15O2O2 → C18H26O7      | 1E-13 |                                       |
| 171. C821O2 + C10H15O2O2 → C18H26O7      | 1E-13 |                                       |
| 172. C732CO3 + C10H15O2O2 → C18H26O8     | 1E-13 |                                       |
| 173. C8BCO2 + C10H15O2O2 → C18H26O4      | 1E-13 |                                       |
| 174. C88O2 + C10H15O2O2 → C18H26O6       | 1E-13 |                                       |
| 175. C718CO3 + C10H15O2O2 → C18H26O7     | 1E-13 |                                       |
| 176. C87O2 + C10H15O2O2 → C18H26O7       | 1E-13 |                                       |
| 177. C721CO3 + C10H15O2O2 → C18H26O7     | 1E-13 |                                       |
| 178. NC826O2 + C10H15O2O2 → C18H27O6NO3  | 1E-13 |                                       |
|                                          |       |                                       |
| 179. APINAO2 + C10H15O3O2 → C20H30O6     | 1E-13 |                                       |
| 180. APINBO2 + C10H15O3O2 → C20H30O6     | 1E-13 |                                       |
| 181. APINCO2 + C10H15O3O2 → C20H30O6     | 1E-13 |                                       |
| 182. C107O2 + C10H15O3O2 → C20H30O7      | 1E-13 |                                       |
| 183. C109O2 + C10H15O3O2 → C20H30O7      | 1E-13 |                                       |
| 184. C106O2 + C10H15O3O2 → C20H30O8      | 1E-13 |                                       |
| 185. C920CO3 + C10H15O3O2 → C20H30O8     | 1E-13 |                                       |
| 186. C108O2 + C10H15O3O2 → C20H30O8      | 1E-13 |                                       |
| 187. PINALO2 + C10H15O3O2 → C20H30O7     | 1E-13 |                                       |
| 188. C96CO3 + C10H15O3O2 → C20H30O7      | 1E-13 |                                       |
| 189. C923CO3 + C10H15O3O2 → C20H30O7     | 1E-13 |                                       |
| 190. LIMAO2 + C10H15O3O2 → C20H30O6      | 1E-13 |                                       |
| 191. LIMALBO2 + C10H15O3O2 → C20H30O7    | 1E-13 |                                       |
| 192. LIMCO2 + C10H15O3O2 → C20H30O6      | 1E-13 |                                       |
| 193. LIMALO2 + C10H15O3O2 → C20H30O7     | 1E-13 |                                       |
| 194. LIMBO2 + C10H15O3O2 → C20H30O6      | 1E-13 |                                       |
| 195. LIMALAO2 + C10H15O3O2 → C20H30O7    | 1E-13 |                                       |
| 196. BPINAO2 + C10H15O3O2 → C20H30O6     | 1E-13 |                                       |
| 197. BPINBO2 + C10H15O3O2 → C20H30O6     | 1E-13 |                                       |
| 198. BPINCO2 + C10H15O3O2 → C20H30O6     | 1E-13 |                                       |
| 199. C918CO3 + C10H15O3O2 → C20H30O7     | 1E-13 |                                       |
| 200. NAPINAO2 + C10H15O3O2 → C20H31O5NO3 | 1E-13 | HOM dimers containing NO <sub>3</sub> |
| 201. NAPINBO2 + C10H15O3O2 → C20H31O5NO3 | 1E-13 | HOM dimers containing NO <sub>3</sub> |
| 202. NC102O2 + C10H15O3O2 → C20H31O6NO3  | 1E-13 | HOM dimers containing NO <sub>3</sub> |
| 203. NC101O2 + C10H15O3O2 → C20H31O6NO3  | 1E-13 | HOM dimers containing NO <sub>3</sub> |
| 204. NLIMO2 + C10H15O3O2 → C20H31O5NO3   | 1E-13 | HOM dimers containing NO <sub>3</sub> |
| 205. NLIMALO2 + C10H15O3O2 → C20H31O6NO3 | 1E-13 | HOM dimers containing NO <sub>3</sub> |
| 206. NC91CO3 + C10H15O3O2 → C20H31O6NO3  | 1E-13 | HOM dimers containing NO <sub>3</sub> |
| 207. NBPINAO2 + C10H15O3O2 → C20H31O5NO3 | 1E-13 | HOM dimers containing NO <sub>3</sub> |
| 208. NBPINBO2 + C10H15O3O2 → C20H31O5NO3 | 1E-13 | HOM dimers containing NO <sub>3</sub> |
|                                          |       |                                       |
| 209. C96O2 + C10H15O3O2 → C19H28O6       | 1E-13 |                                       |
| 210. C89CO3 + C10H15O3O2 → C19H28O7      | 1E-13 |                                       |
| 211. C920O2 + C10H15O3O2 → C19H28O7      | 1E-13 |                                       |
| 212. C97O2 + C10H15O3O2 → C19H28O7       | 1E-13 |                                       |
| 213. C85CO3 + C10H15O3O2 → C19H28O7      | 1E-13 |                                       |
| 214. C811CO3 + C10H15O3O2 → C19H28O8     | 1E-13 |                                       |
| 215. C921O2 + C10H15O3O2 → C19H28O8      | 1E-13 |                                       |
| 216. C98O2 + C10H15O3O2 → C19H28O8       | 1E-13 |                                       |
| 217. C922O2 + C10H15O3O2 → C19H28O9      | 1E-13 |                                       |
| 218. C923O2 + C10H15O3O2 → C19H28O6      | 1E-13 |                                       |
| 219. C924O2 + C10H15O3O2 → C19H28O7      | 1E-13 |                                       |
| 220. C816CO3 + C10H15O3O2 → C19H28O7     | 1E-13 |                                       |
| 221. NORLIMO2 + C10H15O3O2 → C19H28O8    | 1E-13 |                                       |
| 222. LMKAO2 + C10H15O3O2 → C19H28O7      | 1E-13 |                                       |
| 223. LMKBO2 + C10H15O3O2 → C19H28O7      | 1E-13 |                                       |
| 224. C926O2 + C10H15O3O2 → C19H28O8      | 1E-13 |                                       |
| 225. C817CO3 + C10H15O3O2 → C19H28O8     | 1E-13 |                                       |
| 226. LMLKAO2 + C10H15O3O2 → C19H28O8     | 1E-13 |                                       |
| 227. LMLKBO2 + C10H15O3O2 → C19H28O8     | 1E-13 |                                       |
| 228. C823CO3 + C10H15O3O2 → C19H28O8     | 1E-13 |                                       |
| 229. C925O2 + C10H15O3O2 → C19H28O9      | 1E-13 |                                       |
| 230. NOPINAO2 + C10H15O3O2 → C19H28O6    | 1E-13 |                                       |
| 231. NOPINBO2 + C10H15O3O2 → C19H28O6    | 1E-13 |                                       |



|                                                                                           |       |                                       |
|-------------------------------------------------------------------------------------------|-------|---------------------------------------|
| 232. NOPINCO <sub>2</sub> + C10H15O3O <sub>2</sub> → C19H28O <sub>6</sub>                 | 1E-13 |                                       |
| 233. NOPINDO <sub>2</sub> + C10H15O3O <sub>2</sub> → C19H28O <sub>6</sub>                 | 1E-13 |                                       |
| 234. C918O <sub>2</sub> + C10H15O3O <sub>2</sub> → C19H28O <sub>7</sub>                   | 1E-13 |                                       |
| 235. C9DCO <sub>2</sub> + C10H15O3O <sub>2</sub> → C19H28O <sub>7</sub>                   | 1E-13 |                                       |
| 236. C915O <sub>2</sub> + C10H15O3O <sub>2</sub> → C19H28O <sub>7</sub>                   | 1E-13 |                                       |
| 237. C917O <sub>2</sub> + C10H15O3O <sub>2</sub> → C19H28O <sub>7</sub>                   | 1E-13 |                                       |
| 238. C919O <sub>2</sub> + C10H15O3O <sub>2</sub> → C19H28O <sub>8</sub>                   | 1E-13 |                                       |
| 239. C914O <sub>2</sub> + C10H15O3O <sub>2</sub> → C19H28O <sub>8</sub>                   | 1E-13 |                                       |
| 240. C916O <sub>2</sub> + C10H15O3O <sub>2</sub> → C19H28O <sub>8</sub>                   | 1E-13 |                                       |
| 241. C88CO <sub>3</sub> + C10H15O3O <sub>2</sub> → C19H28O <sub>8</sub>                   | 1E-13 |                                       |
| 242. C87CO <sub>3</sub> + C10H15O3O <sub>2</sub> → C19H28O <sub>9</sub>                   | 1E-13 |                                       |
| 243. C822CO <sub>3</sub> + C10H15O3O <sub>2</sub> → C19H28O <sub>7</sub>                  | 1E-13 |                                       |
| 244. NLMKAO <sub>2</sub> + C10H15O3O <sub>2</sub> → C19H29O <sub>6</sub> NO <sub>3</sub>  | 1E-13 |                                       |
|                                                                                           |       |                                       |
| 245. C85O <sub>2</sub> + C10H15O3O <sub>2</sub> → C18H26O <sub>6</sub>                    | 1E-13 |                                       |
| 246. C89O <sub>2</sub> + C10H15O3O <sub>2</sub> → C18H26O <sub>6</sub>                    | 1E-13 |                                       |
| 247. C86O <sub>2</sub> + C10H15O3O <sub>2</sub> → C18H26O <sub>7</sub>                    | 1E-13 |                                       |
| 248. C811O <sub>2</sub> + C10H15O3O <sub>2</sub> → C18H26O <sub>7</sub>                   | 1E-13 |                                       |
| 249. C810O <sub>2</sub> + C10H15O3O <sub>2</sub> → C18H26O <sub>7</sub>                   | 1E-13 |                                       |
| 250. C812O <sub>2</sub> + C10H15O3O <sub>2</sub> → C18H26O <sub>8</sub>                   | 1E-13 |                                       |
| 251. C813O <sub>2</sub> + C10H15O3O <sub>2</sub> → C18H26O <sub>6</sub>                   | 1E-13 |                                       |
| 252. C729CO <sub>3</sub> + C10H15O3O <sub>2</sub> → C18H26O <sub>7</sub>                  | 1E-13 |                                       |
| 253. C816O <sub>2</sub> + C10H15O3O <sub>2</sub> → C18H26O <sub>6</sub>                   | 1E-13 |                                       |
| 254. C817O <sub>2</sub> + C10H15O3O <sub>2</sub> → C18H26O <sub>7</sub>                   | 1E-13 |                                       |
| 255. C826O <sub>2</sub> + C10H15O3O <sub>2</sub> → C18H26O <sub>8</sub>                   | 1E-13 |                                       |
| 256. C822O <sub>2</sub> + C10H15O3O <sub>2</sub> → C18H26O <sub>6</sub>                   | 1E-13 |                                       |
| 257. C818O <sub>2</sub> + C10H15O3O <sub>2</sub> → C18H26O <sub>8</sub>                   | 1E-13 |                                       |
| 258. C823O <sub>2</sub> + C10H15O3O <sub>2</sub> → C18H26O <sub>7</sub>                   | 1E-13 |                                       |
| 259. C819O <sub>2</sub> + C10H15O3O <sub>2</sub> → C18H26O <sub>8</sub>                   | 1E-13 |                                       |
| 260. C727CO <sub>3</sub> + C10H15O3O <sub>2</sub> → C18H26O <sub>8</sub>                  | 1E-13 |                                       |
| 261. C731CO <sub>3</sub> + C10H15O3O <sub>2</sub> → C18H26O <sub>8</sub>                  | 1E-13 |                                       |
| 262. C824O <sub>2</sub> + C10H15O3O <sub>2</sub> → C18H26O <sub>7</sub>                   | 1E-13 |                                       |
| 263. C820O <sub>2</sub> + C10H15O3O <sub>2</sub> → C18H26O <sub>9</sub>                   | 1E-13 |                                       |
| 264. C825O <sub>2</sub> + C10H15O3O <sub>2</sub> → C18H26O <sub>8</sub>                   | 1E-13 |                                       |
| 265. C821O <sub>2</sub> + C10H15O3O <sub>2</sub> → C18H26O <sub>8</sub>                   | 1E-13 |                                       |
| 266. C732CO <sub>3</sub> + C10H15O3O <sub>2</sub> → C18H26O <sub>9</sub>                  | 1E-13 |                                       |
| 267. C8BCO <sub>2</sub> + C10H15O3O <sub>2</sub> → C18H26O <sub>5</sub>                   | 1E-13 |                                       |
| 268. C88O <sub>2</sub> + C10H15O3O <sub>2</sub> → C18H26O <sub>7</sub>                    | 1E-13 |                                       |
| 269. C718CO <sub>3</sub> + C10H15O3O <sub>2</sub> → C18H26O <sub>8</sub>                  | 1E-13 |                                       |
| 270. C87O <sub>2</sub> + C10H15O3O <sub>2</sub> → C18H26O <sub>8</sub>                    | 1E-13 |                                       |
| 271. C721CO <sub>3</sub> + C10H15O3O <sub>2</sub> → C18H26O <sub>8</sub>                  | 1E-13 |                                       |
| 272. NC826O <sub>2</sub> + C10H15O3O <sub>2</sub> → C18H27O <sub>7</sub> NO <sub>3</sub>  | 1E-13 |                                       |
|                                                                                           |       |                                       |
| 273. APINAO <sub>2</sub> + C10H15O4O <sub>2</sub> → C20H30O <sub>7</sub>                  | 1E-13 |                                       |
| 274. APINBO <sub>2</sub> + C10H15O4O <sub>2</sub> → C20H30O <sub>7</sub>                  | 1E-13 |                                       |
| 275. APINCO <sub>2</sub> + C10H15O4O <sub>2</sub> → C20H30O <sub>7</sub>                  | 1E-13 |                                       |
| 276. C107O <sub>2</sub> + C10H15O4O <sub>2</sub> → C20H30O <sub>8</sub>                   | 1E-13 |                                       |
| 277. C109O <sub>2</sub> + C10H15O4O <sub>2</sub> → C20H30O <sub>8</sub>                   | 1E-13 |                                       |
| 278. C106O <sub>2</sub> + C10H15O4O <sub>2</sub> → C20H30O <sub>9</sub>                   | 1E-13 |                                       |
| 279. C920CO <sub>3</sub> + C10H15O4O <sub>2</sub> → C20H30O <sub>9</sub>                  | 1E-13 |                                       |
| 280. C108O <sub>2</sub> + C10H15O4O <sub>2</sub> → C20H30O <sub>9</sub>                   | 1E-13 |                                       |
| 281. PINALO <sub>2</sub> + C10H15O4O <sub>2</sub> → C20H30O <sub>8</sub>                  | 1E-13 |                                       |
| 282. C96CO <sub>3</sub> + C10H15O4O <sub>2</sub> → C20H30O <sub>8</sub>                   | 1E-13 |                                       |
| 283. C923CO <sub>3</sub> + C10H15O4O <sub>2</sub> → C20H30O <sub>8</sub>                  | 1E-13 |                                       |
| 284. LIMAO <sub>2</sub> + C10H15O4O <sub>2</sub> → C20H30O <sub>7</sub>                   | 1E-13 |                                       |
| 285. LIMALBO <sub>2</sub> + C10H15O4O <sub>2</sub> → C20H30O <sub>8</sub>                 | 1E-13 |                                       |
| 286. LIMCO <sub>2</sub> + C10H15O4O <sub>2</sub> → C20H30O <sub>7</sub>                   | 1E-13 |                                       |
| 287. LIMALO <sub>2</sub> + C10H15O4O <sub>2</sub> → C20H30O <sub>8</sub>                  | 1E-13 |                                       |
| 288. LIMBO <sub>2</sub> + C10H15O4O <sub>2</sub> → C20H30O <sub>7</sub>                   | 1E-13 |                                       |
| 289. LIMALAO <sub>2</sub> + C10H15O4O <sub>2</sub> → C20H30O <sub>8</sub>                 | 1E-13 |                                       |
| 290. BPINAO <sub>2</sub> + C10H15O4O <sub>2</sub> → C20H30O <sub>7</sub>                  | 1E-13 |                                       |
| 291. BPINBO <sub>2</sub> + C10H15O4O <sub>2</sub> → C20H30O <sub>7</sub>                  | 1E-13 |                                       |
| 292. BPINCO <sub>2</sub> + C10H15O4O <sub>2</sub> → C20H30O <sub>7</sub>                  | 1E-13 |                                       |
| 293. C918CO <sub>3</sub> + C10H15O4O <sub>2</sub> → C20H30O <sub>8</sub>                  | 1E-13 |                                       |
| 294. NAPINAO <sub>2</sub> + C10H15O4O <sub>2</sub> → C20H31O <sub>6</sub> NO <sub>3</sub> | 1E-13 | HOM dimers containing NO <sub>3</sub> |
| 295. NAPINBO <sub>2</sub> + C10H15O4O <sub>2</sub> → C20H31O <sub>6</sub> NO <sub>3</sub> | 1E-13 | HOM dimers containing NO <sub>3</sub> |
| 296. NC102O <sub>2</sub> + C10H15O4O <sub>2</sub> → C20H31O <sub>7</sub> NO <sub>3</sub>  | 1E-13 | HOM dimers containing NO <sub>3</sub> |
| 297. NC101O <sub>2</sub> + C10H15O4O <sub>2</sub> → C20H31O <sub>7</sub> NO <sub>3</sub>  | 1E-13 | HOM dimers containing NO <sub>3</sub> |
| 298. NLIMO <sub>2</sub> + C10H15O4O <sub>2</sub> → C20H31O <sub>6</sub> NO <sub>3</sub>   | 1E-13 | HOM dimers containing NO <sub>3</sub> |
| 299. NLIMALO <sub>2</sub> + C10H15O4O <sub>2</sub> → C20H31O <sub>7</sub> NO <sub>3</sub> | 1E-13 | HOM dimers containing NO <sub>3</sub> |
| 300. NC91CO <sub>3</sub> + C10H15O4O <sub>2</sub> → C20H31O <sub>7</sub> NO <sub>3</sub>  | 1E-13 | HOM dimers containing NO <sub>3</sub> |
| 301. NBPINAO <sub>2</sub> + C10H15O4O <sub>2</sub> → C20H31O <sub>6</sub> NO <sub>3</sub> | 1E-13 | HOM dimers containing NO <sub>3</sub> |
| 302. NBPINBO <sub>2</sub> + C10H15O4O <sub>2</sub> → C20H31O <sub>6</sub> NO <sub>3</sub> | 1E-13 | HOM dimers containing NO <sub>3</sub> |

|                                         |       |
|-----------------------------------------|-------|
| 303. C96O2 + C10H15O4O2 → C19H28O7      | 1E-13 |
| 304. C89CO3 + C10H15O4O2 → C19H28O8     | 1E-13 |
| 305. C920O2 + C10H15O4O2 → C19H28O8     | 1E-13 |
| 306. C97O2 + C10H15O4O2 → C19H28O8      | 1E-13 |
| 307. C85CO3 + C10H15O4O2 → C19H28O8     | 1E-13 |
| 308. C811CO3 + C10H15O4O2 → C19H28O9    | 1E-13 |
| 309. C921O2 + C10H15O4O2 → C19H28O9     | 1E-13 |
| 310. C98O2 + C10H15O4O2 → C19H28O9      | 1E-13 |
| 311. C922O2+ C10H15O4O2 → C19H28O10     | 1E-13 |
| 312. C923O2 + C10H15O4O2 → C19H28O7     | 1E-13 |
| 313. C924O2 + C10H15O4O2 → C19H28O8     | 1E-13 |
| 314. C816CO3 + C10H15O4O2 → C19H28O8    | 1E-13 |
| 315. NORLIMO2 + C10H15O4O2 → C19H28O9   | 1E-13 |
| 316. LMKAO2 + C10H15O4O2 → C19H28O8     | 1E-13 |
| 317. LMKBO2 + C10H15O4O2 → C19H28O8     | 1E-13 |
| 318. C926O2 + C10H15O4O2 → C19H28O9     | 1E-13 |
| 319. C817CO3 + C10H15O4O2 → C19H28O9    | 1E-13 |
| 320. LMLKAO2 + C10H15O4O2 → C19H28O9    | 1E-13 |
| 321. LMLKBO2 + C10H15O4O2 → C19H28O9    | 1E-13 |
| 322. C823CO3 + C10H15O4O2 → C19H28O9    | 1E-13 |
| 323. C925O2 + C10H15O4O2 → C19H28O10    | 1E-13 |
| 324. NOPINAO2+ C10H15O4O2 → C19H28O7    | 1E-13 |
| 325. NOPINBO2+ C10H15O4O2 → C19H28O7    | 1E-13 |
| 326. NOPINCO2+ C10H15O4O2 → C19H28O7    | 1E-13 |
| 327. NOPINDO2+ C10H15O4O2 → C19H28O7    | 1E-13 |
| 328. C918O2+ C10H15O4O2 → C19H28O8      | 1E-13 |
| 329. C9DCO2+ C10H15O4O2 → C19H28O8      | 1E-13 |
| 330. C915O2+ C10H15O4O2 → C19H28O8      | 1E-13 |
| 331. C917O2+ C10H15O4O2 → C19H28O8      | 1E-13 |
| 332. C919O2+ C10H15O4O2 → C19H28O9      | 1E-13 |
| 333. C914O2+ C10H15O4O2 → C19H28O9      | 1E-13 |
| 334. C916O2+ C10H15O4O2 → C19H28O9      | 1E-13 |
| 335. C88CO3+ C10H15O4O2 → C19H28O9      | 1E-13 |
| 336. C87CO3+ C10H15O4O2 → C19H28O10     | 1E-13 |
| 337. C822CO3+ C10H15O4O2 → C19H28O8     | 1E-13 |
| 338. NLMKAO2+ C10H15O4O2 → C19H29O7NO3  | 1E-13 |
| 339. C85O2 + C10H15O4O2 → C18H26O7      | 1E-13 |
| 340. C89O2 + C10H15O4O2 → C18H26O7      | 1E-13 |
| 341. C86O2 + C10H15O4O2 → C18H26O8      | 1E-13 |
| 342. C811O2 + C10H15O4O2 → C18H26O8     | 1E-13 |
| 343. C810O2 + C10H15O4O2 → C18H26O8     | 1E-13 |
| 344. C812O2 + C10H15O4O2 → C18H26O9     | 1E-13 |
| 345. C813O2 + C10H15O4O2 → C18H26O7     | 1E-13 |
| 346. C729CO3 + C10H15O4O2 → C18H26O8    | 1E-13 |
| 347. C816O2 + C10H15O4O2 → C18H26O7     | 1E-13 |
| 348. C817O2 + C10H15O4O2 → C18H26O8     | 1E-13 |
| 349. C826O2 + C10H15O4O2 → C18H26O9     | 1E-13 |
| 350. C822O2 + C10H15O4O2 → C18H26O7     | 1E-13 |
| 351. C818O2 + C10H15O4O2 → C18H26O9     | 1E-13 |
| 352. C823O2 + C10H15O4O2 → C18H26O8     | 1E-13 |
| 353. C819O2 + C10H15O4O2 → C18H26O9     | 1E-13 |
| 354. C727CO3 + C10H15O4O2 → C18H26O9    | 1E-13 |
| 355. C731CO3 + C10H15O4O2 → C18H26O9    | 1E-13 |
| 356. C824O2 + C10H15O4O2 → C18H26O8     | 1E-13 |
| 357. C820O2 + C10H15O4O2 → C18H26O10    | 1E-13 |
| 358. C825O2 + C10H15O4O2 → C18H26O9     | 1E-13 |
| 359. C821O2 + C10H15O4O2 → C18H26O9     | 1E-13 |
| 360. C732CO3 + C10H15O4O2 → C18H26O10   | 1E-13 |
| 361. C8BCO2 + C10H15O4O2 → C18H26O6     | 1E-13 |
| 362. C88O2 + C10H15O4O2 → C18H26O8      | 1E-13 |
| 363. C718CO3 + C10H15O4O2 → C18H26O9    | 1E-13 |
| 364. C87O2 + C10H15O4O2 → C18H26O9      | 1E-13 |
| 365. C721CO3 + C10H15O4O2 → C18H26O9    | 1E-13 |
| 366. NC826O2 + C10H15O4O2 → C18H27O8NO3 | 1E-13 |
| 367. APINAO2 + C10H15O5O2 → C20H30O8    | 5E-13 |
| 368. APINBO2 + C10H15O5O2 → C20H30O8    | 5E-13 |
| 369. APINCO2 + C10H15O5O2 → C20H30O8    | 5E-13 |
| 370. C107O2 + C10H15O5O2 → C20H30O9     | 5E-13 |
| 371. C109O2 + C10H15O5O2 → C20H30O9     | 5E-13 |
| 372. C106O2 + C10H15O5O2 → C20H30O10    | 5E-13 |
| 373. C920CO3 + C10H15O5O2 → C20H30O10   | 5E-13 |
| 374. C108O2 + C10H15O5O2 → C20H30O10    | 5E-13 |

|                                          |       |                                       |
|------------------------------------------|-------|---------------------------------------|
| 375. PINALO2 + C10H15O5O2 → C20H30O9     | 5E-13 |                                       |
| 376. C96CO3 + C10H15O5O2 → C20H30O9      | 5E-13 |                                       |
| 377. C923CO3 + C10H15O5O2 → C20H30O9     | 5E-13 |                                       |
| 378. LIMAO2 + C10H15O5O2 → C20H30O8      | 5E-13 |                                       |
| 379. LIMALBO2 + C10H15O5O2 → C20H30O9    | 5E-13 |                                       |
| 380. LIMCO2 + C10H15O5O2 → C20H30O8      | 5E-13 |                                       |
| 381. LIMALO2 + C10H15O5O2 → C20H30O9     | 5E-13 |                                       |
| 382. LIMBO2 + C10H15O5O2 → C20H30O8      | 5E-13 |                                       |
| 383. LIMALAO2 + C10H15O5O2 → C20H30O9    | 5E-13 |                                       |
| 384. BPINAO2 + C10H15O5O2 → C20H30O8     | 5E-13 |                                       |
| 385. BPINBO2 + C10H15O5O2 → C20H30O8     | 5E-13 |                                       |
| 386. BPINCO2 + C10H15O5O2 → C20H30O8     | 5E-13 |                                       |
| 387. C918CO3 + C10H15O5O2 → C20H30O9     | 5E-13 |                                       |
| 388. NAPINAO2 + C10H15O5O2 → C20H31O7NO3 | 5E-13 | HOM dimers containing NO <sub>3</sub> |
| 389. NAPINBO2 + C10H15O5O2 → C20H31O7NO3 | 5E-13 | HOM dimers containing NO <sub>3</sub> |
| 390. NC102O2 + C10H15O5O2 → C20H31O8NO3  | 5E-13 | HOM dimers containing NO <sub>3</sub> |
| 391. NC101O2 + C10H15O5O2 → C20H31O8NO3  | 5E-13 | HOM dimers containing NO <sub>3</sub> |
| 392. NLIMO2 + C10H15O5O2 → C20H31O7NO3   | 5E-13 | HOM dimers containing NO <sub>3</sub> |
| 393. NLIMALO2 + C10H15O5O2 → C20H31O8NO3 | 5E-13 | HOM dimers containing NO <sub>3</sub> |
| 394. NC91CO3 + C10H15O5O2 → C20H31O8NO3  | 5E-13 | HOM dimers containing NO <sub>3</sub> |
| 395. NBPINAO2 + C10H15O5O2 → C20H31O7NO3 | 5E-13 | HOM dimers containing NO <sub>3</sub> |
| 396. NBPINBO2 + C10H15O5O2 → C20H31O7NO3 | 5E-13 | HOM dimers containing NO <sub>3</sub> |
|                                          |       |                                       |
| 397. C96O2 + C10H15O5O2 → C19H28O8       | 5E-13 |                                       |
| 398. C89CO3 + C10H15O5O2 → C19H28O9      | 5E-13 |                                       |
| 399. C920O2 + C10H15O5O2 → C19H28O9      | 5E-13 |                                       |
| 400. C97O2 + C10H15O5O2 → C19H28O9       | 5E-13 |                                       |
| 401. C85CO3 + C10H15O5O2 → C19H28O9      | 5E-13 |                                       |
| 402. C811CO3 + C10H15O5O2 → C19H28O10    | 5E-13 |                                       |
| 403. C921O2 + C10H15O5O2 → C19H28O10     | 5E-13 |                                       |
| 404. C98O2 + C10H15O5O2 → C19H28O10      | 5E-13 |                                       |
| 405. C922O2+ C10H15O5O2 → C19H28O11      | 5E-13 |                                       |
| 406. C923O2 + C10H15O5O2 → C19H28O8      | 5E-13 |                                       |
| 407. C924O2 + C10H15O5O2 → C19H28O9      | 5E-13 |                                       |
| 408. C816CO3 + C10H15O5O2 → C19H28O9     | 5E-13 |                                       |
| 409. NORLIMO2 + C10H15O5O2 → C19H28O10   | 5E-13 |                                       |
| 410. LMKAO2 + C10H15O5O2 → C19H28O9      | 5E-13 |                                       |
| 411. LMKBO2 + C10H15O5O2 → C19H28O9      | 5E-13 |                                       |
| 412. C926O2 + C10H15O5O2 → C19H28O10     | 5E-13 |                                       |
| 413. C817CO3 + C10H15O5O2 → C19H28O10    | 5E-13 |                                       |
| 414. LMLKAO2 + C10H15O5O2 → C19H28O10    | 5E-13 |                                       |
| 415. LMLKBO2 + C10H15O5O2 → C19H28O10    | 5E-13 |                                       |
| 416. C823CO3 + C10H15O5O2 → C19H28O10    | 5E-13 |                                       |
| 417. C925O2 + C10H15O5O2 → C19H28O11     | 5E-13 |                                       |
| 418. NOPINAO2+ C10H15O5O2 → C19H28O8     | 5E-13 |                                       |
| 419. NOPINBO2+ C10H15O5O2 → C19H28O8     | 5E-13 |                                       |
| 420. NOPINCO2+ C10H15O5O2 → C19H28O8     | 5E-13 |                                       |
| 421. NOPINDO2+ C10H15O5O2 → C19H28O8     | 5E-13 |                                       |
| 422. C918O2+ C10H15O5O2 → C19H28O9       | 5E-13 |                                       |
| 423. C9DCO2+ C10H15O5O2 → C19H28O9       | 5E-13 |                                       |
| 424. C915O2+ C10H15O5O2 → C19H28O9       | 5E-13 |                                       |
| 425. C917O2+ C10H15O5O2 → C19H28O9       | 5E-13 |                                       |
| 426. C919O2+ C10H15O5O2 → C19H28O10      | 5E-13 |                                       |
| 427. C914O2+ C10H15O5O2 → C19H28O10      | 5E-13 |                                       |
| 428. C916O2+ C10H15O5O2 → C19H28O10      | 5E-13 |                                       |
| 429. C88CO3+ C10H15O5O2 → C19H28O10      | 5E-13 |                                       |
| 430. C87CO3+ C10H15O5O2 → C19H28O11      | 5E-13 |                                       |
| 431. C822CO3+ C10H15O5O2 → C19H28O9      | 5E-13 |                                       |
| 432. NLMKAO2+ C10H15O5O2 → C19H29O8NO3   | 5E-13 |                                       |
|                                          |       |                                       |
| 433. C85O2 + C10H15O5O2 → C18H26O8       | 5E-13 |                                       |
| 434. C89O2 + C10H15O5O2 → C18H26O8       | 5E-13 |                                       |
| 435. C86O2 + C10H15O5O2 → C18H26O9       | 5E-13 |                                       |
| 436. C811O2 + C10H15O5O2 → C18H26O9      | 5E-13 |                                       |
| 437. C810O2 + C10H15O5O2 → C18H26O9      | 5E-13 |                                       |
| 438. C812O2 + C10H15O5O2 → C18H26O10     | 5E-13 |                                       |
| 439. C813O2 + C10H15O5O2 → C18H26O8      | 5E-13 |                                       |
| 440. C729CO3 + C10H15O5O2 → C18H26O9     | 5E-13 |                                       |
| 441. C816O2 + C10H15O5O2 → C18H26O8      | 5E-13 |                                       |
| 442. C817O2 + C10H15O5O2 → C18H26O9      | 5E-13 |                                       |
| 443. C826O2 + C10H15O5O2 → C18H26O10     | 5E-13 |                                       |
| 444. C822O2 + C10H15O5O2 → C18H26O8      | 5E-13 |                                       |
| 445. C818O2 + C10H15O5O2 → C18H26O10     | 5E-13 |                                       |
| 446. C823O2 + C10H15O5O2 → C18H26O9      | 5E-13 |                                       |

|                                          |       |                                       |
|------------------------------------------|-------|---------------------------------------|
| 447. C819O2 + C10H15O5O2 → C18H26O10     | 5E-13 |                                       |
| 448. C727CO3 + C10H15O5O2 → C18H26O10    | 5E-13 |                                       |
| 449. C731CO3 + C10H15O5O2 → C18H26O10    | 5E-13 |                                       |
| 450. C824O2 + C10H15O5O2 → C18H26O9      | 5E-13 |                                       |
| 451. C820O2 + C10H15O5O2 → C18H26O11     | 5E-13 |                                       |
| 452. C825O2 + C10H15O5O2 → C18H26O10     | 5E-13 |                                       |
| 453. C821O2 + C10H15O5O2 → C18H26O10     | 5E-13 |                                       |
| 454. C732CO3 + C10H15O5O2 → C18H26O11    | 5E-13 |                                       |
| 455. C8BCO2 + C10H15O5O2 → C18H26O7      | 5E-13 |                                       |
| 456. C88O2 + C10H15O5O2 → C18H26O9       | 5E-13 |                                       |
| 457. C718CO3 + C10H15O5O2 → C18H26O10    | 5E-13 |                                       |
| 458. C87O2 + C10H15O5O2 → C18H26O10      | 5E-13 |                                       |
| 459. C721CO3 + C10H15O5O2 → C18H26O10    | 5E-13 |                                       |
| 460. NC826O2 + C10H15O5O2 → C18H27O9NO3  | 5E-13 |                                       |
|                                          |       |                                       |
| 461. APINAO2 + C10H15O6O2 → C20H30O9     | 2E-12 |                                       |
| 462. APINBO2 + C10H15O6O2 → C20H30O9     | 2E-12 |                                       |
| 463. APINCO2 + C10H15O6O2 → C20H30O9     | 2E-12 |                                       |
| 464. C107O2 + C10H15O6O2 → C20H30O10     | 2E-12 |                                       |
| 465. C109O2 + C10H15O6O2 → C20H30O10     | 2E-12 |                                       |
| 466. C106O2 + C10H15O6O2 → C20H30O11     | 2E-12 |                                       |
| 467. C920CO3 + C10H15O6O2 → C20H30O11    | 2E-12 |                                       |
| 468. C108O2 + C10H15O6O2 → C20H30O11     | 2E-12 |                                       |
| 469. PINALO2 + C10H15O6O2 → C20H30O10    | 2E-12 |                                       |
| 470. C96CO3 + C10H15O6O2 → C20H30O10     | 2E-12 |                                       |
| 471. C923CO3 + C10H15O6O2 → C20H30O10    | 2E-12 |                                       |
| 472. LIMAO2 + C10H15O6O2 → C20H30O9      | 2E-12 |                                       |
| 473. LIMALBO2 + C10H15O6O2 → C20H30O10   | 2E-12 |                                       |
| 474. LIMCO2 + C10H15O6O2 → C20H30O9      | 2E-12 |                                       |
| 475. LIMALO2 + C10H15O6O2 → C20H30O10    | 2E-12 |                                       |
| 476. LIMBO2 + C10H15O6O2 → C20H30O9      | 2E-12 |                                       |
| 477. LIMALAO2 + C10H15O6O2 → C20H30O10   | 2E-12 |                                       |
| 478. BPINAO2 + C10H15O6O2 → C20H30O9     | 2E-12 |                                       |
| 479. BPINBO2 + C10H15O6O2 → C20H30O9     | 2E-12 |                                       |
| 480. BPINCO2 + C10H15O6O2 → C20H30O9     | 2E-12 |                                       |
| 481. C918CO3 + C10H15O6O2 → C20H30O10    | 2E-12 |                                       |
| 482. NAPINAO2 + C10H15O6O2 → C20H31O8NO3 | 2E-12 | HOM dimers containing NO <sub>3</sub> |
| 483. NAPINBO2 + C10H15O6O2 → C20H31O8NO3 | 2E-12 | HOM dimers containing NO <sub>3</sub> |
| 484. NC102O2 + C10H15O6O2 → C20H31O9NO3  | 2E-12 | HOM dimers containing NO <sub>3</sub> |
| 485. NC101O2 + C10H15O6O2 → C20H31O9NO3  | 2E-12 | HOM dimers containing NO <sub>3</sub> |
| 486. NLIMO2 + C10H15O6O2 → C20H31O8NO3   | 2E-12 | HOM dimers containing NO <sub>3</sub> |
| 487. NLIMALO2 + C10H15O6O2 → C20H31O9NO3 | 2E-12 | HOM dimers containing NO <sub>3</sub> |
| 488. NC91CO3 + C10H15O6O2 → C20H31O9NO3  | 2E-12 | HOM dimers containing NO <sub>3</sub> |
| 489. NBPINAO2 + C10H15O6O2 → C20H31O8NO3 | 2E-12 | HOM dimers containing NO <sub>3</sub> |
| 490. NBPINBO2 + C10H15O6O2 → C20H31O8NO3 | 2E-12 | HOM dimers containing NO <sub>3</sub> |
|                                          |       |                                       |
| 491. C96O2 + C10H15O6O2 → C19H28O9       | 2E-12 |                                       |
| 492. C89CO3 + C10H15O6O2 → C19H28O10     | 2E-12 |                                       |
| 493. C920O2 + C10H15O6O2 → C19H28O10     | 2E-12 |                                       |
| 494. C97O2 + C10H15O6O2 → C19H28O10      | 2E-12 |                                       |
| 495. C85CO3 + C10H15O6O2 → C19H28O10     | 2E-12 |                                       |
| 496. C811CO3 + C10H15O6O2 → C19H28O11    | 2E-12 |                                       |
| 497. C921O2 + C10H15O6O2 → C19H28O11     | 2E-12 |                                       |
| 498. C98O2 + C10H15O6O2 → C19H28O11      | 2E-12 |                                       |
| 499. C922O2+ C10H15O6O2 → C19H28O12      | 2E-12 |                                       |
| 500. C923O2 + C10H15O6O2 → C19H28O9      | 2E-12 |                                       |
| 501. C924O2 + C10H15O6O2 → C19H28O10     | 2E-12 |                                       |
| 502. C816CO3 + C10H15O6O2 → C19H28O10    | 2E-12 |                                       |
| 503. NORLIMO2 + C10H15O6O2 → C19H28O11   | 2E-12 |                                       |
| 504. LMKAO2 + C10H15O6O2 → C19H28O10     | 2E-12 |                                       |
| 505. LMKBO2 + C10H15O6O2 → C19H28O10     | 2E-12 |                                       |
| 506. C926O2 + C10H15O6O2 → C19H28O11     | 2E-12 |                                       |
| 507. C817CO3 + C10H15O6O2 → C19H28O11    | 2E-12 |                                       |
| 508. LMLKAO2 + C10H15O6O2 → C19H28O11    | 2E-12 |                                       |
| 509. LMLKBO2 + C10H15O6O2 → C19H28O11    | 2E-12 |                                       |
| 510. C823CO3 + C10H15O6O2 → C19H28O11    | 2E-12 |                                       |
| 511. C925O2 + C10H15O6O2 → C19H28O12     | 2E-12 |                                       |
| 512. NOPINAO2+ C10H15O6O2 → C19H28O9     | 2E-12 |                                       |
| 513. NOPINBO2+ C10H15O6O2 → C19H28O9     | 2E-12 |                                       |
| 514. NOPINCO2+ C10H15O6O2 → C19H28O9     | 2E-12 |                                       |
| 515. NOPINDO2+ C10H15O6O2 → C19H28O9     | 2E-12 |                                       |
| 516. C918O2+ C10H15O6O2 → C19H28O10      | 2E-12 |                                       |
| 517. C9DCO2+ C10H15O6O2 → C19H28O10      | 2E-12 |                                       |
| 518. C915O2+ C10H15O6O2 → C19H28O10      | 2E-12 |                                       |

|                                           |       |                                       |
|-------------------------------------------|-------|---------------------------------------|
| 519. C917O2+ C10H15O6O2 → C19H28O10       | 2E-12 |                                       |
| 520. C919O2+ C10H15O6O2 → C19H28O11       | 2E-12 |                                       |
| 521. C914O2+ C10H15O6O2 → C19H28O11       | 2E-12 |                                       |
| 522. C916O2+ C10H15O6O2 → C19H28O11       | 2E-12 |                                       |
| 523. C88CO3+ C10H15O6O2 → C19H28O11       | 2E-12 |                                       |
| 524. C87CO3+ C10H15O6O2 → C19H28O12       | 2E-12 |                                       |
| 525. C822CO3+ C10H15O6O2 → C19H28O10      | 2E-12 |                                       |
| 526. NLMKAO2+ C10H15O6O2 → C19H29O9NO3    | 2E-12 |                                       |
|                                           |       |                                       |
| 527. C85O2 + C10H15O6O2 → C18H26O9        | 2E-12 |                                       |
| 528. C89O2 + C10H15O6O2 → C18H26O9        | 2E-12 |                                       |
| 529. C86O2 + C10H15O6O2 → C18H26O10       | 2E-12 |                                       |
| 530. C811O2 + C10H15O6O2 → C18H26O10      | 2E-12 |                                       |
| 531. C810O2 + C10H15O6O2 → C18H26O10      | 2E-12 |                                       |
| 532. C812O2 + C10H15O6O2 → C18H26O11      | 2E-12 |                                       |
| 533. C813O2 + C10H15O6O2 → C18H26O9       | 2E-12 |                                       |
| 534. C729CO3 + C10H15O6O2 → C18H26O10     | 2E-12 |                                       |
| 535. C816O2 + C10H15O6O2 → C18H26O9       | 2E-12 |                                       |
| 536. C817O2 + C10H15O6O2 → C18H26O10      | 2E-12 |                                       |
| 537. C826O2 + C10H15O6O2 → C18H26O11      | 2E-12 |                                       |
| 538. C822O2 + C10H15O6O2 → C18H26O9       | 2E-12 |                                       |
| 539. C818O2 + C10H15O6O2 → C18H26O11      | 2E-12 |                                       |
| 540. C823O2 + C10H15O6O2 → C18H26O10      | 2E-12 |                                       |
| 541. C819O2 + C10H15O6O2 → C18H26O11      | 2E-12 |                                       |
| 542. C727CO3 + C10H15O6O2 → C18H26O11     | 2E-12 |                                       |
| 543. C731CO3 + C10H15O6O2 → C18H26O11     | 2E-12 |                                       |
| 544. C824O2 + C10H15O6O2 → C18H26O10      | 2E-12 |                                       |
| 545. C820O2 + C10H15O6O2 → C18H26O12      | 2E-12 |                                       |
| 546. C825O2 + C10H15O6O2 → C18H26O11      | 2E-12 |                                       |
| 547. C821O2 + C10H15O6O2 → C18H26O11      | 2E-12 |                                       |
| 548. C732CO3 + C10H15O6O2 → C18H26O12     | 2E-12 |                                       |
| 549. C8BCO2 + C10H15O6O2 → C18H26O8       | 2E-12 |                                       |
| 550. C88O2 + C10H15O6O2 → C18H26O10       | 2E-12 |                                       |
| 551. C718CO3 + C10H15O6O2 → C18H26O11     | 2E-12 |                                       |
| 552. C87O2 + C10H15O6O2 → C18H26O11       | 2E-12 |                                       |
| 553. C721CO3 + C10H15O6O2 → C18H26O11     | 2E-12 |                                       |
| 554. NC826O2 + C10H15O6O2 → C18H27O10NO3  | 2E-12 |                                       |
|                                           |       |                                       |
| 555. APINAO2 + C10H15O7O2 → C20H30O10     | 3E-12 |                                       |
| 556. APINBO2 + C10H15O7O2 → C20H30O10     | 3E-12 |                                       |
| 557. APINCO2 + C10H15O7O2 → C20H30O10     | 3E-12 |                                       |
| 558. C107O2 + C10H15O7O2 → C20H30O11      | 3E-12 |                                       |
| 559. C109O2 + C10H15O7O2 → C20H30O11      | 3E-12 |                                       |
| 560. C106O2 + C10H15O7O2 → C20H30O12      | 3E-12 |                                       |
| 561. C920CO3 + C10H15O7O2 → C20H30O12     | 3E-12 |                                       |
| 562. C108O2 + C10H15O7O2 → C20H30O12      | 3E-12 |                                       |
| 563. PINALO2 + C10H15O7O2 → C20H30O11     | 3E-12 |                                       |
| 564. C96CO3 + C10H15O7O2 → C20H30O11      | 3E-12 |                                       |
| 565. C923CO3 + C10H15O7O2 → C20H30O11     | 3E-12 |                                       |
| 566. LIMAO2 + C10H15O7O2 → C20H30O10      | 3E-12 |                                       |
| 567. LIMALBO2 + C10H15O7O2 → C20H30O11    | 3E-12 |                                       |
| 568. LIMCO2 + C10H15O7O2 → C20H30O10      | 3E-12 |                                       |
| 569. LIMALO2 + C10H15O7O2 → C20H30O11     | 3E-12 |                                       |
| 570. LIMBO2 + C10H15O7O2 → C20H30O10      | 3E-12 |                                       |
| 571. LIMALAO2 + C10H15O7O2 → C20H30O11    | 3E-12 |                                       |
| 572. BPINAO2 + C10H15O7O2 → C20H30O10     | 3E-12 |                                       |
| 573. BPINBO2 + C10H15O7O2 → C20H30O10     | 3E-12 |                                       |
| 574. BPINCO2 + C10H15O7O2 → C20H30O10     | 3E-12 |                                       |
| 575. C918CO3 + C10H15O7O2 → C20H30O11     | 3E-12 |                                       |
| 576. NAPINAO2 + C10H15O7O2 → C20H31O9NO3  | 3E-12 | HOM dimers containing NO <sub>3</sub> |
| 577. NAPINBO2 + C10H15O7O2 → C20H31O9NO3  | 3E-12 | HOM dimers containing NO <sub>3</sub> |
| 578. NC102O2 + C10H15O7O2 → C20H31O10NO3  | 3E-12 | HOM dimers containing NO <sub>3</sub> |
| 579. NC101O2 + C10H15O7O2 → C20H31O10NO3  | 3E-12 | HOM dimers containing NO <sub>3</sub> |
| 580. NLIMO2 + C10H15O7O2 → C20H31O9NO3    | 3E-12 | HOM dimers containing NO <sub>3</sub> |
| 581. NLIMALO2 + C10H15O7O2 → C20H31O10NO3 | 3E-12 | HOM dimers containing NO <sub>3</sub> |
| 582. NC91CO3 + C10H15O7O2 → C20H31O10NO3  | 3E-12 | HOM dimers containing NO <sub>3</sub> |
| 583. NBPINAO2 + C10H15O7O2 → C20H31O9NO3  | 3E-12 | HOM dimers containing NO <sub>3</sub> |
| 584. NBPINBO2 + C10H15O7O2 → C20H31O9NO3  | 3E-12 | HOM dimers containing NO <sub>3</sub> |
|                                           |       |                                       |
| 585. C96O2 + C10H15O7O2 → C19H28O10       | 3E-12 |                                       |
| 586. C89CO3 + C10H15O7O2 → C19H28O11      | 3E-12 |                                       |
| 587. C920O2 + C10H15O7O2 → C19H28O11      | 3E-12 |                                       |
| 588. C97O2 + C10H15O7O2 → C19H28O11       | 3E-12 |                                       |
| 589. C85CO3 + C10H15O7O2 → C19H28O11      | 3E-12 |                                       |

|                                          |       |
|------------------------------------------|-------|
| 590. C811CO3 + C10H15O7O2 → C19H28O12    | 3E-12 |
| 591. C921O2 + C10H15O7O2 → C19H28O12     | 3E-12 |
| 592. C98O2 + C10H15O7O2 → C19H28O12      | 3E-12 |
| 593. C922O2+ C10H15O7O2 → C19H28O13      | 3E-12 |
| 594. C923O2 + C10H15O7O2 → C19H28O10     | 3E-12 |
| 595. C924O2 + C10H15O7O2 → C19H28O11     | 3E-12 |
| 596. C816CO3 + C10H15O7O2 → C19H28O11    | 3E-12 |
| 597. NORLIMO2 + C10H15O7O2 → C19H28O12   | 3E-12 |
| 598. LMKAO2 + C10H15O7O2 → C19H28O11     | 3E-12 |
| 599. LMKBO2 + C10H15O7O2 → C19H28O11     | 3E-12 |
| 600. C926O2 + C10H15O7O2 → C19H28O12     | 3E-12 |
| 601. C817CO3 + C10H15O7O2 → C19H28O12    | 3E-12 |
| 602. LMLKAO2 + C10H15O7O2 → C19H28O12    | 3E-12 |
| 603. LMLKBO2 + C10H15O7O2 → C19H28O12    | 3E-12 |
| 604. C823CO3 + C10H15O7O2 → C19H28O12    | 3E-12 |
| 605. C925O2 + C10H15O7O2 → C19H28O13     | 3E-12 |
| 606. NOPINAO2+ C10H15O7O2 → C19H28O10    | 3E-12 |
| 607. NOPINBO2+ C10H15O7O2 → C19H28O10    | 3E-12 |
| 608. NOPINCO2+ C10H15O7O2 → C19H28O10    | 3E-12 |
| 609. NOPINDO2+ C10H15O7O2 → C19H28O10    | 3E-12 |
| 610. C918O2+ C10H15O7O2 → C19H28O11      | 3E-12 |
| 611. C9DCO2+ C10H15O7O2 → C19H28O11      | 3E-12 |
| 612. C915O2+ C10H15O7O2 → C19H28O11      | 3E-12 |
| 613. C917O2+ C10H15O7O2 → C19H28O11      | 3E-12 |
| 614. C919O2+ C10H15O7O2 → C19H28O12      | 3E-12 |
| 615. C914O2+ C10H15O7O2 → C19H28O12      | 3E-12 |
| 616. C916O2+ C10H15O7O2 → C19H28O12      | 3E-12 |
| 617. C88CO3+ C10H15O7O2 → C19H28O12      | 3E-12 |
| 618. C87CO3+ C10H15O7O2 → C19H28O13      | 3E-12 |
| 619. C822CO3+ C10H15O7O2 → C19H28O11     | 3E-12 |
| 620. NLMKAO2+ C10H15O7O2 → C19H29O10NO3  | 3E-12 |
| 621. C85O2 + C10H15O7O2 → C18H26O10      | 3E-12 |
| 622. C89O2 + C10H15O7O2 → C18H26O10      | 3E-12 |
| 623. C86O2 + C10H15O7O2 → C18H26O11      | 3E-12 |
| 624. C811O2 + C10H15O7O2 → C18H26O11     | 3E-12 |
| 625. C810O2 + C10H15O7O2 → C18H26O11     | 3E-12 |
| 626. C812O2 + C10H15O7O2 → C18H26O12     | 3E-12 |
| 627. C813O2 + C10H15O7O2 → C18H26O10     | 3E-12 |
| 628. C729CO3 + C10H15O7O2 → C18H26O11    | 3E-12 |
| 629. C816O2 + C10H15O7O2 → C18H26O10     | 3E-12 |
| 630. C817O2 + C10H15O7O2 → C18H26O11     | 3E-12 |
| 631. C826O2 + C10H15O7O2 → C18H26O12     | 3E-12 |
| 632. C822O2 + C10H15O7O2 → C18H26O10     | 3E-12 |
| 633. C818O2 + C10H15O7O2 → C18H26O12     | 3E-12 |
| 634. C823O2 + C10H15O7O2 → C18H26O11     | 3E-12 |
| 635. C819O2 + C10H15O7O2 → C18H26O12     | 3E-12 |
| 636. C727CO3 + C10H15O7O2 → C18H26O12    | 3E-12 |
| 637. C731CO3 + C10H15O7O2 → C18H26O12    | 3E-12 |
| 638. C824O2 + C10H15O7O2 → C18H26O11     | 3E-12 |
| 639. C820O2 + C10H15O7O2 → C18H26O13     | 3E-12 |
| 640. C825O2 + C10H15O7O2 → C18H26O12     | 3E-12 |
| 641. C821O2 + C10H15O7O2 → C18H26O12     | 3E-12 |
| 642. C732CO3 + C10H15O7O2 → C18H26O13    | 3E-12 |
| 643. C8BCO2 + C10H15O7O2 → C18H26O9      | 3E-12 |
| 644. C88O2 + C10H15O7O2 → C18H26O11      | 3E-12 |
| 645. C718CO3 + C10H15O7O2 → C18H26O12    | 3E-12 |
| 646. C87O2 + C10H15O7O2 → C18H26O12      | 3E-12 |
| 647. C721CO3 + C10H15O7O2 → C18H26O12    | 3E-12 |
| 648. NC826O2 + C10H15O7O2 → C18H27O11NO3 | 3E-12 |
| 649. APINAO2 + C10H15O8O2 → C20H30O11    | 3E-12 |
| 650. APINBO2 + C10H15O8O2 → C20H30O11    | 3E-12 |
| 651. APINCO2 + C10H15O8O2 → C20H30O11    | 3E-12 |
| 652. C107O2 + C10H15O8O2 → C20H30O12     | 3E-12 |
| 653. C109O2 + C10H15O8O2 → C20H30O12     | 3E-12 |
| 654. C106O2 + C10H15O8O2 → C20H30O13     | 3E-12 |
| 655. C920CO3 + C10H15O8O2 → C20H30O13    | 3E-12 |
| 656. C108O2 + C10H15O8O2 → C20H30O13     | 3E-12 |
| 657. PINALO2 + C10H15O8O2 → C20H30O12    | 3E-12 |
| 658. C96CO3 + C10H15O8O2 → C20H30O12     | 3E-12 |
| 659. C923CO3 + C10H15O8O2 → C20H30O12    | 3E-12 |
| 660. LIMAO2 + C10H15O8O2 → C20H30O11     | 3E-12 |
| 661. LIMALBO2 + C10H15O8O2 → C20H30O12   | 3E-12 |

|                                                                                                                                                                                       |       |                                       |
|---------------------------------------------------------------------------------------------------------------------------------------------------------------------------------------|-------|---------------------------------------|
| 662. LIMCO <sub>2</sub> + C <sub>10</sub> H <sub>15</sub> O <sub>8</sub> O <sub>2</sub> → C <sub>20</sub> H <sub>30</sub> O <sub>11</sub>                                             | 3E-12 |                                       |
| 663. LIMALO <sub>2</sub> + C <sub>10</sub> H <sub>15</sub> O <sub>8</sub> O <sub>2</sub> → C <sub>20</sub> H <sub>30</sub> O <sub>12</sub>                                            | 3E-12 |                                       |
| 664. LIMBO <sub>2</sub> + C <sub>10</sub> H <sub>15</sub> O <sub>8</sub> O <sub>2</sub> → C <sub>20</sub> H <sub>30</sub> O <sub>11</sub>                                             | 3E-12 |                                       |
| 665. LIMALAO <sub>2</sub> + C <sub>10</sub> H <sub>15</sub> O <sub>8</sub> O <sub>2</sub> → C <sub>20</sub> H <sub>30</sub> O <sub>12</sub>                                           | 3E-12 |                                       |
| 666. BPINAO <sub>2</sub> + C <sub>10</sub> H <sub>15</sub> O <sub>8</sub> O <sub>2</sub> → C <sub>20</sub> H <sub>30</sub> O <sub>11</sub>                                            | 3E-12 |                                       |
| 667. BPINBO <sub>2</sub> + C <sub>10</sub> H <sub>15</sub> O <sub>8</sub> O <sub>2</sub> → C <sub>20</sub> H <sub>30</sub> O <sub>11</sub>                                            | 3E-12 |                                       |
| 668. BPINCO <sub>2</sub> + C <sub>10</sub> H <sub>15</sub> O <sub>8</sub> O <sub>2</sub> → C <sub>20</sub> H <sub>30</sub> O <sub>11</sub>                                            | 3E-12 |                                       |
| 669. C <sub>9</sub> I <sub>8</sub> CO <sub>3</sub> + C <sub>10</sub> H <sub>15</sub> O <sub>8</sub> O <sub>2</sub> → C <sub>20</sub> H <sub>30</sub> O <sub>12</sub>                  | 3E-12 |                                       |
| 670. NAPINAO <sub>2</sub> + C <sub>10</sub> H <sub>15</sub> O <sub>8</sub> O <sub>2</sub> → C <sub>20</sub> H <sub>31</sub> O <sub>10</sub> NO <sub>3</sub>                           | 3E-12 | HOM dimers containing NO <sub>3</sub> |
| 671. NAPINBO <sub>2</sub> + C <sub>10</sub> H <sub>15</sub> O <sub>8</sub> O <sub>2</sub> → C <sub>20</sub> H <sub>31</sub> O <sub>10</sub> NO <sub>3</sub>                           | 3E-12 | HOM dimers containing NO <sub>3</sub> |
| 672. NC <sub>10</sub> O <sub>2</sub> + C <sub>10</sub> H <sub>15</sub> O <sub>8</sub> O <sub>2</sub> → C <sub>20</sub> H <sub>31</sub> O <sub>11</sub> NO <sub>3</sub>                | 3E-12 | HOM dimers containing NO <sub>3</sub> |
| 673. NC <sub>10</sub> I <sub>0</sub> O <sub>2</sub> + C <sub>10</sub> H <sub>15</sub> O <sub>8</sub> O <sub>2</sub> → C <sub>20</sub> H <sub>31</sub> O <sub>11</sub> NO <sub>3</sub> | 3E-12 | HOM dimers containing NO <sub>3</sub> |
| 674. NLIMO <sub>2</sub> + C <sub>10</sub> H <sub>15</sub> O <sub>8</sub> O <sub>2</sub> → C <sub>20</sub> H <sub>31</sub> O <sub>10</sub> NO <sub>3</sub>                             | 3E-12 | HOM dimers containing NO <sub>3</sub> |
| 675. NLIMALO <sub>2</sub> + C <sub>10</sub> H <sub>15</sub> O <sub>8</sub> O <sub>2</sub> → C <sub>20</sub> H <sub>31</sub> O <sub>11</sub> NO <sub>3</sub>                           | 3E-12 | HOM dimers containing NO <sub>3</sub> |
| 676. NC <sub>9</sub> I <sub>0</sub> CO <sub>3</sub> + C <sub>10</sub> H <sub>15</sub> O <sub>8</sub> O <sub>2</sub> → C <sub>20</sub> H <sub>31</sub> O <sub>11</sub> NO <sub>3</sub> | 3E-12 | HOM dimers containing NO <sub>3</sub> |
| 677. NBPINAO <sub>2</sub> + C <sub>10</sub> H <sub>15</sub> O <sub>8</sub> O <sub>2</sub> → C <sub>20</sub> H <sub>31</sub> O <sub>10</sub> NO <sub>3</sub>                           | 3E-12 | HOM dimers containing NO <sub>3</sub> |
| 678. NBPINBO <sub>2</sub> + C <sub>10</sub> H <sub>15</sub> O <sub>8</sub> O <sub>2</sub> → C <sub>20</sub> H <sub>31</sub> O <sub>10</sub> NO <sub>3</sub>                           | 3E-12 | HOM dimers containing NO <sub>3</sub> |
|                                                                                                                                                                                       |       |                                       |
| 679. C <sub>9</sub> O <sub>2</sub> + C <sub>10</sub> H <sub>15</sub> O <sub>8</sub> O <sub>2</sub> → C <sub>19</sub> H <sub>28</sub> O <sub>11</sub>                                  | 3E-12 |                                       |
| 680. C <sub>8</sub> CO <sub>3</sub> + C <sub>10</sub> H <sub>15</sub> O <sub>8</sub> O <sub>2</sub> → C <sub>19</sub> H <sub>28</sub> O <sub>12</sub>                                 | 3E-12 |                                       |
| 681. C <sub>9</sub> 2O <sub>2</sub> + C <sub>10</sub> H <sub>15</sub> O <sub>8</sub> O <sub>2</sub> → C <sub>19</sub> H <sub>28</sub> O <sub>12</sub>                                 | 3E-12 |                                       |
| 682. C <sub>9</sub> 7O <sub>2</sub> + C <sub>10</sub> H <sub>15</sub> O <sub>8</sub> O <sub>2</sub> → C <sub>19</sub> H <sub>28</sub> O <sub>12</sub>                                 | 3E-12 |                                       |
| 683. C <sub>8</sub> 5CO <sub>3</sub> + C <sub>10</sub> H <sub>15</sub> O <sub>8</sub> O <sub>2</sub> → C <sub>19</sub> H <sub>28</sub> O <sub>12</sub>                                | 3E-12 |                                       |
| 684. C <sub>8</sub> 11CO <sub>3</sub> + C <sub>10</sub> H <sub>15</sub> O <sub>8</sub> O <sub>2</sub> → C <sub>19</sub> H <sub>28</sub> O <sub>13</sub>                               | 3E-12 |                                       |
| 685. C <sub>9</sub> 21O <sub>2</sub> + C <sub>10</sub> H <sub>15</sub> O <sub>8</sub> O <sub>2</sub> → C <sub>19</sub> H <sub>28</sub> O <sub>13</sub>                                | 3E-12 |                                       |
| 686. C <sub>9</sub> 8O <sub>2</sub> + C <sub>10</sub> H <sub>15</sub> O <sub>8</sub> O <sub>2</sub> → C <sub>19</sub> H <sub>28</sub> O <sub>13</sub>                                 | 3E-12 |                                       |
| 687. C <sub>9</sub> 22O <sub>2</sub> + C <sub>10</sub> H <sub>15</sub> O <sub>8</sub> O <sub>2</sub> → C <sub>19</sub> H <sub>28</sub> O <sub>14</sub>                                | 3E-12 |                                       |
| 688. C <sub>9</sub> 23O <sub>2</sub> + C <sub>10</sub> H <sub>15</sub> O <sub>8</sub> O <sub>2</sub> → C <sub>19</sub> H <sub>28</sub> O <sub>11</sub>                                | 3E-12 |                                       |
| 689. C <sub>9</sub> 24O <sub>2</sub> + C <sub>10</sub> H <sub>15</sub> O <sub>8</sub> O <sub>2</sub> → C <sub>19</sub> H <sub>28</sub> O <sub>12</sub>                                | 3E-12 |                                       |
| 690. C <sub>8</sub> 16CO <sub>3</sub> + C <sub>10</sub> H <sub>15</sub> O <sub>8</sub> O <sub>2</sub> → C <sub>19</sub> H <sub>28</sub> O <sub>12</sub>                               | 3E-12 |                                       |
| 691. NORLIMO <sub>2</sub> + C <sub>10</sub> H <sub>15</sub> O <sub>8</sub> O <sub>2</sub> → C <sub>19</sub> H <sub>28</sub> O <sub>13</sub>                                           | 3E-12 |                                       |
| 692. LMKAO <sub>2</sub> + C <sub>10</sub> H <sub>15</sub> O <sub>8</sub> O <sub>2</sub> → C <sub>19</sub> H <sub>28</sub> O <sub>12</sub>                                             | 3E-12 |                                       |
| 693. LMKBO <sub>2</sub> + C <sub>10</sub> H <sub>15</sub> O <sub>8</sub> O <sub>2</sub> → C <sub>19</sub> H <sub>28</sub> O <sub>12</sub>                                             | 3E-12 |                                       |
| 694. C <sub>9</sub> 26O <sub>2</sub> + C <sub>10</sub> H <sub>15</sub> O <sub>8</sub> O <sub>2</sub> → C <sub>19</sub> H <sub>28</sub> O <sub>13</sub>                                | 3E-12 |                                       |
| 695. C <sub>8</sub> 17CO <sub>3</sub> + C <sub>10</sub> H <sub>15</sub> O <sub>8</sub> O <sub>2</sub> → C <sub>19</sub> H <sub>28</sub> O <sub>13</sub>                               | 3E-12 |                                       |
| 696. LMLKAO <sub>2</sub> + C <sub>10</sub> H <sub>15</sub> O <sub>8</sub> O <sub>2</sub> → C <sub>19</sub> H <sub>28</sub> O <sub>13</sub>                                            | 3E-12 |                                       |
| 697. LMLKBO <sub>2</sub> + C <sub>10</sub> H <sub>15</sub> O <sub>8</sub> O <sub>2</sub> → C <sub>19</sub> H <sub>28</sub> O <sub>13</sub>                                            | 3E-12 |                                       |
| 698. C <sub>8</sub> 23CO <sub>3</sub> + C <sub>10</sub> H <sub>15</sub> O <sub>8</sub> O <sub>2</sub> → C <sub>19</sub> H <sub>28</sub> O <sub>13</sub>                               | 3E-12 |                                       |
| 699. C <sub>9</sub> 25O <sub>2</sub> + C <sub>10</sub> H <sub>15</sub> O <sub>8</sub> O <sub>2</sub> → C <sub>19</sub> H <sub>28</sub> O <sub>14</sub>                                | 3E-12 |                                       |
| 700. NOPINAO <sub>2</sub> + C <sub>10</sub> H <sub>15</sub> O <sub>8</sub> O <sub>2</sub> → C <sub>19</sub> H <sub>28</sub> O <sub>11</sub>                                           | 3E-12 |                                       |
| 701. NOPINBO <sub>2</sub> + C <sub>10</sub> H <sub>15</sub> O <sub>8</sub> O <sub>2</sub> → C <sub>19</sub> H <sub>28</sub> O <sub>11</sub>                                           | 3E-12 |                                       |
| 702. NOPINCO <sub>2</sub> + C <sub>10</sub> H <sub>15</sub> O <sub>8</sub> O <sub>2</sub> → C <sub>19</sub> H <sub>28</sub> O <sub>11</sub>                                           | 3E-12 |                                       |
| 703. NOPINDO <sub>2</sub> + C <sub>10</sub> H <sub>15</sub> O <sub>8</sub> O <sub>2</sub> → C <sub>19</sub> H <sub>28</sub> O <sub>11</sub>                                           | 3E-12 |                                       |
| 704. C <sub>9</sub> 18O <sub>2</sub> + C <sub>10</sub> H <sub>15</sub> O <sub>8</sub> O <sub>2</sub> → C <sub>19</sub> H <sub>28</sub> O <sub>12</sub>                                | 3E-12 |                                       |
| 705. C <sub>9</sub> DCO <sub>2</sub> + C <sub>10</sub> H <sub>15</sub> O <sub>8</sub> O <sub>2</sub> → C <sub>19</sub> H <sub>28</sub> O <sub>12</sub>                                | 3E-12 |                                       |
| 706. C <sub>9</sub> 15O <sub>2</sub> + C <sub>10</sub> H <sub>15</sub> O <sub>8</sub> O <sub>2</sub> → C <sub>19</sub> H <sub>28</sub> O <sub>12</sub>                                | 3E-12 |                                       |
| 707. C <sub>9</sub> 17O <sub>2</sub> + C <sub>10</sub> H <sub>15</sub> O <sub>8</sub> O <sub>2</sub> → C <sub>19</sub> H <sub>28</sub> O <sub>12</sub>                                | 3E-12 |                                       |
| 708. C <sub>9</sub> 19O <sub>2</sub> + C <sub>10</sub> H <sub>15</sub> O <sub>8</sub> O <sub>2</sub> → C <sub>19</sub> H <sub>28</sub> O <sub>13</sub>                                | 3E-12 |                                       |
| 709. C <sub>9</sub> 14O <sub>2</sub> + C <sub>10</sub> H <sub>15</sub> O <sub>8</sub> O <sub>2</sub> → C <sub>19</sub> H <sub>28</sub> O <sub>13</sub>                                | 3E-12 |                                       |
| 710. C <sub>9</sub> 16O <sub>2</sub> + C <sub>10</sub> H <sub>15</sub> O <sub>8</sub> O <sub>2</sub> → C <sub>19</sub> H <sub>28</sub> O <sub>13</sub>                                | 3E-12 |                                       |
| 711. C <sub>8</sub> 8CO <sub>3</sub> + C <sub>10</sub> H <sub>15</sub> O <sub>8</sub> O <sub>2</sub> → C <sub>19</sub> H <sub>28</sub> O <sub>13</sub>                                | 3E-12 |                                       |
| 712. C <sub>8</sub> 7CO <sub>3</sub> + C <sub>10</sub> H <sub>15</sub> O <sub>8</sub> O <sub>2</sub> → C <sub>19</sub> H <sub>28</sub> O <sub>14</sub>                                | 3E-12 |                                       |
| 713. C <sub>8</sub> 22CO <sub>3</sub> + C <sub>10</sub> H <sub>15</sub> O <sub>8</sub> O <sub>2</sub> → C <sub>19</sub> H <sub>28</sub> O <sub>12</sub>                               | 3E-12 |                                       |
| 714. NLMKAO <sub>2</sub> + C <sub>10</sub> H <sub>15</sub> O <sub>8</sub> O <sub>2</sub> → C <sub>19</sub> H <sub>29</sub> O <sub>11</sub> NO <sub>3</sub>                            | 3E-12 |                                       |
|                                                                                                                                                                                       |       |                                       |
| 715. C <sub>8</sub> 5O <sub>2</sub> + C <sub>10</sub> H <sub>15</sub> O <sub>8</sub> O <sub>2</sub> → C <sub>18</sub> H <sub>26</sub> O <sub>11</sub>                                 | 3E-12 |                                       |
| 716. C <sub>8</sub> 9O <sub>2</sub> + C <sub>10</sub> H <sub>15</sub> O <sub>8</sub> O <sub>2</sub> → C <sub>18</sub> H <sub>26</sub> O <sub>11</sub>                                 | 3E-12 |                                       |
| 717. C <sub>8</sub> 6O <sub>2</sub> + C <sub>10</sub> H <sub>15</sub> O <sub>8</sub> O <sub>2</sub> → C <sub>18</sub> H <sub>26</sub> O <sub>12</sub>                                 | 3E-12 |                                       |
| 718. C <sub>8</sub> 11O <sub>2</sub> + C <sub>10</sub> H <sub>15</sub> O <sub>8</sub> O <sub>2</sub> → C <sub>18</sub> H <sub>26</sub> O <sub>12</sub>                                | 3E-12 |                                       |
| 719. C <sub>8</sub> 10O <sub>2</sub> + C <sub>10</sub> H <sub>15</sub> O <sub>8</sub> O <sub>2</sub> → C <sub>18</sub> H <sub>26</sub> O <sub>12</sub>                                | 3E-12 |                                       |
| 720. C <sub>8</sub> 12O <sub>2</sub> + C <sub>10</sub> H <sub>15</sub> O <sub>8</sub> O <sub>2</sub> → C <sub>18</sub> H <sub>26</sub> O <sub>13</sub>                                | 3E-12 |                                       |
| 721. C <sub>8</sub> 13O <sub>2</sub> + C <sub>10</sub> H <sub>15</sub> O <sub>8</sub> O <sub>2</sub> → C <sub>18</sub> H <sub>26</sub> O <sub>11</sub>                                | 3E-12 |                                       |
| 722. C <sub>7</sub> 29CO <sub>3</sub> + C <sub>10</sub> H <sub>15</sub> O <sub>8</sub> O <sub>2</sub> → C <sub>18</sub> H <sub>26</sub> O <sub>12</sub>                               | 3E-12 |                                       |
| 723. C <sub>8</sub> 16O <sub>2</sub> + C <sub>10</sub> H <sub>15</sub> O <sub>8</sub> O <sub>2</sub> → C <sub>18</sub> H <sub>26</sub> O <sub>11</sub>                                | 3E-12 |                                       |
| 724. C <sub>8</sub> 17O <sub>2</sub> + C <sub>10</sub> H <sub>15</sub> O <sub>8</sub> O <sub>2</sub> → C <sub>18</sub> H <sub>26</sub> O <sub>12</sub>                                | 3E-12 |                                       |
| 725. C <sub>8</sub> 26O <sub>2</sub> + C <sub>10</sub> H <sub>15</sub> O <sub>8</sub> O <sub>2</sub> → C <sub>18</sub> H <sub>26</sub> O <sub>13</sub>                                | 3E-12 |                                       |
| 726. C <sub>8</sub> 22O <sub>2</sub> + C <sub>10</sub> H <sub>15</sub> O <sub>8</sub> O <sub>2</sub> → C <sub>18</sub> H <sub>26</sub> O <sub>11</sub>                                | 3E-12 |                                       |
| 727. C <sub>8</sub> 18O <sub>2</sub> + C <sub>10</sub> H <sub>15</sub> O <sub>8</sub> O <sub>2</sub> → C <sub>18</sub> H <sub>26</sub> O <sub>13</sub>                                | 3E-12 |                                       |
| 728. C <sub>8</sub> 23O <sub>2</sub> + C <sub>10</sub> H <sub>15</sub> O <sub>8</sub> O <sub>2</sub> → C <sub>18</sub> H <sub>26</sub> O <sub>12</sub>                                | 3E-12 |                                       |
| 729. C <sub>8</sub> 19O <sub>2</sub> + C <sub>10</sub> H <sub>15</sub> O <sub>8</sub> O <sub>2</sub> → C <sub>18</sub> H <sub>26</sub> O <sub>13</sub>                                | 3E-12 |                                       |
| 730. C <sub>7</sub> 27CO <sub>3</sub> + C <sub>10</sub> H <sub>15</sub> O <sub>8</sub> O <sub>2</sub> → C <sub>18</sub> H <sub>26</sub> O <sub>13</sub>                               | 3E-12 |                                       |
| 731. C <sub>7</sub> 31CO <sub>3</sub> + C <sub>10</sub> H <sub>15</sub> O <sub>8</sub> O <sub>2</sub> → C <sub>18</sub> H <sub>26</sub> O <sub>13</sub>                               | 3E-12 |                                       |
| 732. C <sub>8</sub> 24O <sub>2</sub> + C <sub>10</sub> H <sub>15</sub> O <sub>8</sub> O <sub>2</sub> → C <sub>18</sub> H <sub>26</sub> O <sub>12</sub>                                | 3E-12 |                                       |
| 733. C <sub>8</sub> 20O <sub>2</sub> + C <sub>10</sub> H <sub>15</sub> O <sub>8</sub> O <sub>2</sub> → C <sub>18</sub> H <sub>26</sub> O <sub>14</sub>                                | 3E-12 |                                       |

|                                           |       |                                       |
|-------------------------------------------|-------|---------------------------------------|
| 734. C825O2 + C10H15O8O2 → C18H26O13      | 3E-12 |                                       |
| 735. C821O2 + C10H15O8O2 → C18H26O13      | 3E-12 |                                       |
| 736. C732CO3 + C10H15O8O2 → C18H26O14     | 3E-12 |                                       |
| 737. C8BCO2 + C10H15O8O2 → C18H26O10      | 3E-12 |                                       |
| 738. C88O2 + C10H15O8O2 → C18H26O12       | 3E-12 |                                       |
| 739. C718CO3 + C10H15O8O2 → C18H26O13     | 3E-12 |                                       |
| 740. C87O2 + C10H15O8O2 → C18H26O13       | 3E-12 |                                       |
| 741. C721CO3 + C10H15O8O2 → C18H26O13     | 3E-12 |                                       |
| 742. NC826O2 + C10H15O8O2 → C18H27O12NO3  | 3E-12 |                                       |
|                                           |       |                                       |
| 743. APINAO2 + C10H15O9O2 → C20H30O12     | 5E-12 |                                       |
| 744. APINBO2 + C10H15O9O2 → C20H30O12     | 5E-12 |                                       |
| 745. APINCO2 + C10H15O9O2 → C20H30O12     | 5E-12 |                                       |
| 746. C107O2 + C10H15O9O2 → C20H30O13      | 5E-12 |                                       |
| 747. C109O2 + C10H15O9O2 → C20H30O13      | 5E-12 |                                       |
| 748. C106O2 + C10H15O9O2 → C20H30O14      | 5E-12 |                                       |
| 749. C920CO3 + C10H15O9O2 → C20H30O14     | 5E-12 |                                       |
| 750. C108O2 + C10H15O9O2 → C20H30O14      | 5E-12 |                                       |
| 751. PINALO2 + C10H15O9O2 → C20H30O13     | 5E-12 |                                       |
| 752. C96CO3 + C10H15O9O2 → C20H30O13      | 5E-12 |                                       |
| 753. C923CO3 + C10H15O9O2 → C20H30O13     | 5E-12 |                                       |
| 754. LIMAO2 + C10H15O9O2 → C20H30O12      | 5E-12 |                                       |
| 755. LIMALBO2 + C10H15O9O2 → C20H30O13    | 5E-12 |                                       |
| 756. LIMCO2 + C10H15O9O2 → C20H30O12      | 5E-12 |                                       |
| 757. LIMALO2 + C10H15O9O2 → C20H30O13     | 5E-12 |                                       |
| 758. LIMBO2 + C10H15O9O2 → C20H30O12      | 5E-12 |                                       |
| 759. LIMALAO2 + C10H15O9O2 → C20H30O13    | 5E-12 |                                       |
| 760. BPINAO2 + C10H15O9O2 → C20H30O12     | 5E-12 |                                       |
| 761. BPINBO2 + C10H15O9O2 → C20H30O12     | 5E-12 |                                       |
| 762. BPINCO2 + C10H15O9O2 → C20H30O12     | 5E-12 |                                       |
| 763. C918CO3 + C10H15O9O2 → C20H30O13     | 5E-12 |                                       |
| 764. NAPINAO2 + C10H15O9O2 → C20H31O11NO3 | 5E-12 | HOM dimers containing NO <sub>3</sub> |
| 765. NAPINBO2 + C10H15O9O2 → C20H31O11NO3 | 5E-12 | HOM dimers containing NO <sub>3</sub> |
| 766. NC102O2 + C10H15O9O2 → C20H31O12NO3  | 5E-12 | HOM dimers containing NO <sub>3</sub> |
| 767. NC101O2 + C10H15O9O2 → C20H31O12NO3  | 5E-12 | HOM dimers containing NO <sub>3</sub> |
| 768. NLIMO2 + C10H15O9O2 → C20H31O11NO3   | 5E-12 | HOM dimers containing NO <sub>3</sub> |
| 769. NLIMALO2 + C10H15O9O2 → C20H31O12NO3 | 5E-12 | HOM dimers containing NO <sub>3</sub> |
| 770. NC91CO3 + C10H15O9O2 → C20H31O12NO3  | 5E-12 | HOM dimers containing NO <sub>3</sub> |
| 771. NBPINAO2 + C10H15O9O2 → C20H31O11NO3 | 5E-12 | HOM dimers containing NO <sub>3</sub> |
| 772. NBPINBO2 + C10H15O9O2 → C20H31O11NO3 | 5E-12 | HOM dimers containing NO <sub>3</sub> |
|                                           |       |                                       |
| 773. C96O2 + C10H15O9O2 → C19H28O12       | 5E-12 |                                       |
| 774. C89CO3 + C10H15O9O2 → C19H28O13      | 5E-12 |                                       |
| 775. C920O2 + C10H15O9O2 → C19H28O13      | 5E-12 |                                       |
| 776. C97O2 + C10H15O9O2 → C19H28O13       | 5E-12 |                                       |
| 777. C85CO3 + C10H15O9O2 → C19H28O13      | 5E-12 |                                       |
| 778. C811CO3 + C10H15O9O2 → C19H28O14     | 5E-12 |                                       |
| 779. C921O2 + C10H15O9O2 → C19H28O14      | 5E-12 |                                       |
| 780. C98O2 + C10H15O9O2 → C19H28O14       | 5E-12 |                                       |
| 781. C922O2 + C10H15O9O2 → C19H28O15      | 5E-12 |                                       |
| 782. C923O2 + C10H15O9O2 → C19H28O12      | 5E-12 |                                       |
| 783. C924O2 + C10H15O9O2 → C19H28O13      | 5E-12 |                                       |
| 784. C816CO3 + C10H15O9O2 → C19H28O13     | 5E-12 |                                       |
| 785. NORLIMO2 + C10H15O9O2 → C19H28O14    | 5E-12 |                                       |
| 786. LMKAO2 + C10H15O9O2 → C19H28O13      | 5E-12 |                                       |
| 787. LMKBO2 + C10H15O9O2 → C19H28O13      | 5E-12 |                                       |
| 788. C926O2 + C10H15O9O2 → C19H28O14      | 5E-12 |                                       |
| 789. C817CO3 + C10H15O9O2 → C19H28O14     | 5E-12 |                                       |
| 790. LMLKAO2 + C10H15O9O2 → C19H28O14     | 5E-12 |                                       |
| 791. LMLKBO2 + C10H15O9O2 → C19H28O14     | 5E-12 |                                       |
| 792. C823CO3 + C10H15O9O2 → C19H28O14     | 5E-12 |                                       |
| 793. C925O2 + C10H15O9O2 → C19H28O15      | 5E-12 |                                       |
| 794. NOPINAO2 + C10H15O9O2 → C19H28O12    | 5E-12 |                                       |
| 795. NOPINBO2 + C10H15O9O2 → C19H28O12    | 5E-12 |                                       |
| 796. NOPINCO2 + C10H15O9O2 → C19H28O12    | 5E-12 |                                       |
| 797. NOPINDO2 + C10H15O9O2 → C19H28O12    | 5E-12 |                                       |
| 798. C918O2 + C10H15O9O2 → C19H28O13      | 5E-12 |                                       |
| 799. C9DCO2 + C10H15O9O2 → C19H28O13      | 5E-12 |                                       |
| 800. C915O2 + C10H15O9O2 → C19H28O13      | 5E-12 |                                       |
| 801. C917O2 + C10H15O9O2 → C19H28O13      | 5E-12 |                                       |
| 802. C919O2 + C10H15O9O2 → C19H28O14      | 5E-12 |                                       |
| 803. C914O2 + C10H15O9O2 → C19H28O14      | 5E-12 |                                       |
| 804. C916O2 + C10H15O9O2 → C19H28O14      | 5E-12 |                                       |
| 805. C88CO3 + C10H15O9O2 → C19H28O14      | 5E-12 |                                       |



|                                            |       |                                       |
|--------------------------------------------|-------|---------------------------------------|
| 806. C87CO3+ C10H15O9O2 → C19H28O15        | 5E-12 |                                       |
| 807. C822CO3+ C10H15O9O2 → C19H28O13       | 5E-12 |                                       |
| 808. NLMKAO2+ C10H15O9O2 → C19H29O12NO3    | 5E-12 |                                       |
| 809. C85O2 + C10H15O9O2 → C18H26O12        | 5E-12 |                                       |
| 810. C89O2 + C10H15O9O2 → C18H26O12        | 5E-12 |                                       |
| 811. C86O2 + C10H15O9O2 → C18H26O13        | 5E-12 |                                       |
| 812. C811O2 + C10H15O9O2 → C18H26O13       | 5E-12 |                                       |
| 813. C810O2 + C10H15O9O2 → C18H26O13       | 5E-12 |                                       |
| 814. C812O2 + C10H15O9O2 → C18H26O14       | 5E-12 |                                       |
| 815. C813O2 + C10H15O9O2 → C18H26O12       | 5E-12 |                                       |
| 816. C729CO3 + C10H15O9O2 → C18H26O13      | 5E-12 |                                       |
| 817. C816O2 + C10H15O9O2 → C18H26O12       | 5E-12 |                                       |
| 818. C817O2 + C10H15O9O2 → C18H26O13       | 5E-12 |                                       |
| 819. C826O2 + C10H15O9O2 → C18H26O14       | 5E-12 |                                       |
| 820. C822O2 + C10H15O9O2 → C18H26O12       | 5E-12 |                                       |
| 821. C818O2 + C10H15O9O2 → C18H26O14       | 5E-12 |                                       |
| 822. C823O2 + C10H15O9O2 → C18H26O13       | 5E-12 |                                       |
| 823. C819O2 + C10H15O9O2 → C18H26O14       | 5E-12 |                                       |
| 824. C727CO3 + C10H15O9O2 → C18H26O14      | 5E-12 |                                       |
| 825. C731CO3 + C10H15O9O2 → C18H26O14      | 5E-12 |                                       |
| 826. C824O2 + C10H15O9O2 → C18H26O13       | 5E-12 |                                       |
| 827. C820O2 + C10H15O9O2 → C18H26O15       | 5E-12 |                                       |
| 828. C825O2 + C10H15O9O2 → C18H26O14       | 5E-12 |                                       |
| 829. C821O2 + C10H15O9O2 → C18H26O14       | 5E-12 |                                       |
| 830. C732CO3 + C10H15O9O2 → C18H26O15      | 5E-12 |                                       |
| 831. C8BCO2 + C10H15O9O2 → C18H26O11       | 5E-12 |                                       |
| 832. C88O2 + C10H15O9O2 → C18H26O13        | 5E-12 |                                       |
| 833. C718CO3 + C10H15O9O2 → C18H26O14      | 5E-12 |                                       |
| 834. C87O2 + C10H15O9O2 → C18H26O14        | 5E-12 |                                       |
| 835. C721CO3 + C10H15O9O2 → C18H26O14      | 5E-12 |                                       |
| 836. NC826O2 + C10H15O9O2 → C18H27O13NO3   | 5E-12 |                                       |
| 837. APINAO2 + C10H15O10O2 → C20H30O13     | 5E-12 |                                       |
| 838. APINBO2 + C10H15O10O2 → C20H30O13     | 5E-12 |                                       |
| 839. APINCO2 + C10H15O10O2 → C20H30O13     | 5E-12 |                                       |
| 840. C107O2 + C10H15O10O2 → C20H30O14      | 5E-12 |                                       |
| 841. C109O2 + C10H15O10O2 → C20H30O14      | 5E-12 |                                       |
| 842. C106O2 + C10H15O10O2 → C20H30O15      | 5E-12 |                                       |
| 843. C920CO3 + C10H15O10O2 → C20H30O15     | 5E-12 |                                       |
| 844. C108O2 + C10H15O10O2 → C20H30O15      | 5E-12 |                                       |
| 845. PINALO2 + C10H15O10O2 → C20H30O14     | 5E-12 |                                       |
| 846. C96CO3 + C10H15O10O2 → C20H30O14      | 5E-12 |                                       |
| 847. C923CO3 + C10H15O10O2 → C20H30O14     | 5E-12 |                                       |
| 848. LIMAO2 + C10H15O10O2 → C20H30O13      | 5E-12 |                                       |
| 849. LIMALBO2 + C10H15O10O2 → C20H30O14    | 5E-12 |                                       |
| 850. LIMCO2 + C10H15O10O2 → C20H30O13      | 5E-12 |                                       |
| 851. LIMALO2 + C10H15O10O2 → C20H30O14     | 5E-12 |                                       |
| 852. LIMBO2 + C10H15O10O2 → C20H30O13      | 5E-12 |                                       |
| 853. LIMALAO2 + C10H15O10O2 → C20H30O14    | 5E-12 |                                       |
| 854. BPINAO2 + C10H15O10O2 → C20H30O13     | 5E-12 |                                       |
| 855. BPINBO2 + C10H15O10O2 → C20H30O13     | 5E-12 |                                       |
| 856. BPINCO2 + C10H15O10O2 → C20H30O13     | 5E-12 |                                       |
| 857. C918CO3 + C10H15O10O2 → C20H30O14     | 5E-12 |                                       |
| 858. NAPINAO2 + C10H15O10O2 → C20H31O12NO3 | 5E-12 | HOM dimers containing NO <sub>3</sub> |
| 859. NAPINBO2 + C10H15O10O2 → C20H31O12NO3 | 5E-12 | HOM dimers containing NO <sub>3</sub> |
| 860. NC102O2 + C10H15O10O2 → C20H31O13NO3  | 5E-12 | HOM dimers containing NO <sub>3</sub> |
| 861. NC101O2 + C10H15O10O2 → C20H31O13NO3  | 5E-12 | HOM dimers containing NO <sub>3</sub> |
| 862. NLIMO2 + C10H15O10O2 → C20H31O12NO3   | 5E-12 | HOM dimers containing NO <sub>3</sub> |
| 863. NLIMALO2 + C10H15O10O2 → C20H31O13NO3 | 5E-12 | HOM dimers containing NO <sub>3</sub> |
| 864. NC91CO3 + C10H15O10O2 → C20H31O13NO3  | 5E-12 | HOM dimers containing NO <sub>3</sub> |
| 865. NBPINAO2 + C10H15O10O2 → C20H31O12NO3 | 5E-12 | HOM dimers containing NO <sub>3</sub> |
| 866. NBPINBO2 + C10H15O10O2 → C20H31O12NO3 | 5E-12 | HOM dimers containing NO <sub>3</sub> |
| 867. C96O2 + C10H15O10O2 → C19H28O13       | 5E-12 |                                       |
| 868. C89CO3 + C10H15O10O2 → C19H28O14      | 5E-12 |                                       |
| 869. C920O2 + C10H15O10O2 → C19H28O14      | 5E-12 |                                       |
| 870. C97O2 + C10H15O10O2 → C19H28O14       | 5E-12 |                                       |
| 871. C85CO3 + C10H15O10O2 → C19H28O14      | 5E-12 |                                       |
| 872. C811CO3 + C10H15O10O2 → C19H28O15     | 5E-12 |                                       |
| 873. C921O2 + C10H15O10O2 → C19H28O15      | 5E-12 |                                       |
| 874. C98O2 + C10H15O10O2 → C19H28O15       | 5E-12 |                                       |
| 875. C922O2+ C10H15O10O2 → C19H28O16       | 5E-12 |                                       |
| 876. C923O2 + C10H15O10O2 → C19H28O13      | 5E-12 |                                       |

|                                           |       |
|-------------------------------------------|-------|
| 877. C924O2 + C10H15O10O2 → C19H28O14     | 5E-12 |
| 878. C816CO3 + C10H15O10O2 → C19H28O14    | 5E-12 |
| 879. NORLMO2 + C10H15O10O2 → C19H28O15    | 5E-12 |
| 880. LMKAO2 + C10H15O10O2 → C19H28O14     | 5E-12 |
| 881. LMKBO2 + C10H15O10O2 → C19H28O14     | 5E-12 |
| 882. C926O2 + C10H15O10O2 → C19H28O15     | 5E-12 |
| 883. C817CO3 + C10H15O10O2 → C19H28O15    | 5E-12 |
| 884. LMLKAO2 + C10H15O10O2 → C19H28O15    | 5E-12 |
| 885. LMLKBO2 + C10H15O10O2 → C19H28O15    | 5E-12 |
| 886. C823CO3 + C10H15O10O2 → C19H28O15    | 5E-12 |
| 887. C925O2 + C10H15O10O2 → C19H28O16     | 5E-12 |
| 888. NOPINAO2+ C10H15O10O2 → C19H28O13    | 5E-12 |
| 889. NOPINBO2+ C10H15O10O2 → C19H28O13    | 5E-12 |
| 890. NOPINCO2+ C10H15O10O2 → C19H28O13    | 5E-12 |
| 891. NOPINDO2+ C10H15O10O2 → C19H28O13    | 5E-12 |
| 892. C918O2+ C10H15O10O2 → C19H28O14      | 5E-12 |
| 893. C9DCO2+ C10H15O10O2 → C19H28O14      | 5E-12 |
| 894. C915O2+ C10H15O10O2 → C19H28O14      | 5E-12 |
| 895. C917O2+ C10H15O10O2 → C19H28O14      | 5E-12 |
| 896. C919O2+ C10H15O10O2 → C19H28O15      | 5E-12 |
| 897. C914O2+ C10H15O10O2 → C19H28O15      | 5E-12 |
| 898. C916O2+ C10H15O10O2 → C19H28O15      | 5E-12 |
| 899. C88CO3+ C10H15O10O2 → C19H28O15      | 5E-12 |
| 900. C87CO3+ C10H15O10O2 → C19H28O16      | 5E-12 |
| 901. C822CO3+ C10H15O10O2 → C19H28O14     | 5E-12 |
| 902. NLMKAO2+ C10H15O10O2 → C19H29O13NO3  | 5E-12 |
| 903. C85O2 + C10H15O10O2 → C18H26O13      | 5E-12 |
| 904. C89O2 + C10H15O10O2 → C18H26O13      | 5E-12 |
| 905. C86O2 + C10H15O10O2 → C18H26O14      | 5E-12 |
| 906. C811O2 + C10H15O10O2 → C18H26O14     | 5E-12 |
| 907. C810O2 + C10H15O10O2 → C18H26O14     | 5E-12 |
| 908. C812O2 + C10H15O10O2 → C18H26O15     | 5E-12 |
| 909. C813O2 + C10H15O10O2 → C18H26O13     | 5E-12 |
| 910. C729CO3 + C10H15O10O2 → C18H26O14    | 5E-12 |
| 911. C816O2 + C10H15O10O2 → C18H26O13     | 5E-12 |
| 912. C817O2 + C10H15O10O2 → C18H26O14     | 5E-12 |
| 913. C826O2 + C10H15O10O2 → C18H26O15     | 5E-12 |
| 914. C822O2 + C10H15O10O2 → C18H26O13     | 5E-12 |
| 915. C818O2 + C10H15O10O2 → C18H26O15     | 5E-12 |
| 916. C823O2 + C10H15O10O2 → C18H26O14     | 5E-12 |
| 917. C819O2 + C10H15O10O2 → C18H26O15     | 5E-12 |
| 918. C727CO3 + C10H15O10O2 → C18H26O15    | 5E-12 |
| 919. C731CO3 + C10H15O10O2 → C18H26O15    | 5E-12 |
| 920. C824O2 + C10H15O10O2 → C18H26O14     | 5E-12 |
| 921. C820O2 + C10H15O10O2 → C18H26O16     | 5E-12 |
| 922. C825O2 + C10H15O10O2 → C18H26O15     | 5E-12 |
| 923. C821O2 + C10H15O10O2 → C18H26O15     | 5E-12 |
| 924. C732CO3 + C10H15O10O2 → C18H26O16    | 5E-12 |
| 925. C8BCO2 + C10H15O10O2 → C18H26O12     | 5E-12 |
| 926. C88O2 + C10H15O10O2 → C18H26O14      | 5E-12 |
| 927. C718CO3 + C10H15O10O2 → C18H26O15    | 5E-12 |
| 928. C87O2 + C10H15O10O2 → C18H26O15      | 5E-12 |
| 929. C721CO3 + C10H15O10O2 → C18H26O15    | 5E-12 |
| 930. NC826O2 + C10H15O10O2 → C18H27O14NO3 | 5E-12 |
| 931. APINAO2 + C10H15O11O2 → C20H30O14    | 5E-12 |
| 932. APINBO2 + C10H15O11O2 → C20H30O14    | 5E-12 |
| 933. APINCO2 + C10H15O11O2 → C20H30O14    | 5E-12 |
| 934. C107O2 + C10H15O11O2 → C20H30O15     | 5E-12 |
| 935. C109O2 + C10H15O11O2 → C20H30O15     | 5E-12 |
| 936. C106O2 + C10H15O11O2 → C20H30O16     | 5E-12 |
| 937. C920CO3 + C10H15O11O2 → C20H30O16    | 5E-12 |
| 938. C108O2 + C10H15O11O2 → C20H30O16     | 5E-12 |
| 939. PINALO2 + C10H15O11O2 → C20H30O15    | 5E-12 |
| 940. C96CO3 + C10H15O11O2 → C20H30O15     | 5E-12 |
| 941. C923CO3 + C10H15O11O2 → C20H30O15    | 5E-12 |
| 942. LIMAO2 + C10H15O11O2 → C20H30O14     | 5E-12 |
| 943. LIMALBO2 + C10H15O11O2 → C20H30O15   | 5E-12 |
| 944. LIMCO2 + C10H15O11O2 → C20H30O14     | 5E-12 |
| 945. LIMALO2 + C10H15O11O2 → C20H30O15    | 5E-12 |
| 946. LIMBO2 + C10H15O11O2 → C20H30O14     | 5E-12 |
| 947. LIMALAO2 + C10H15O11O2 → C20H30O15   | 5E-12 |
| 948. BPINAO2 + C10H15O11O2 → C20H30O14    | 5E-12 |

|                                                                                                                                                                                        |       |                                       |
|----------------------------------------------------------------------------------------------------------------------------------------------------------------------------------------|-------|---------------------------------------|
| 949. BPINBO <sub>2</sub> + C <sub>10</sub> H <sub>15</sub> O <sub>11</sub> O <sub>2</sub> → C <sub>20</sub> H <sub>30</sub> O <sub>14</sub>                                            | 5E-12 |                                       |
| 950. BPINCO <sub>2</sub> + C <sub>10</sub> H <sub>15</sub> O <sub>11</sub> O <sub>2</sub> → C <sub>20</sub> H <sub>30</sub> O <sub>14</sub>                                            | 5E-12 |                                       |
| 951. C <sub>9</sub> I <sub>8</sub> CO <sub>3</sub> + C <sub>10</sub> H <sub>15</sub> O <sub>11</sub> O <sub>2</sub> → C <sub>20</sub> H <sub>30</sub> O <sub>15</sub>                  | 5E-12 |                                       |
| 952. NAPINAO <sub>2</sub> + C <sub>10</sub> H <sub>15</sub> O <sub>11</sub> O <sub>2</sub> → C <sub>20</sub> H <sub>31</sub> O <sub>13</sub> NO <sub>3</sub>                           | 5E-12 | HOM dimers containing NO <sub>3</sub> |
| 953. NAPINBO <sub>2</sub> + C <sub>10</sub> H <sub>15</sub> O <sub>11</sub> O <sub>2</sub> → C <sub>20</sub> H <sub>31</sub> O <sub>13</sub> NO <sub>3</sub>                           | 5E-12 | HOM dimers containing NO <sub>3</sub> |
| 954. NC <sub>10</sub> O <sub>2</sub> + C <sub>10</sub> H <sub>15</sub> O <sub>11</sub> O <sub>2</sub> → C <sub>20</sub> H <sub>31</sub> O <sub>14</sub> NO <sub>3</sub>                | 5E-12 | HOM dimers containing NO <sub>3</sub> |
| 955. NC <sub>10</sub> I <sub>0</sub> O <sub>2</sub> + C <sub>10</sub> H <sub>15</sub> O <sub>11</sub> O <sub>2</sub> → C <sub>20</sub> H <sub>31</sub> O <sub>14</sub> NO <sub>3</sub> | 5E-12 | HOM dimers containing NO <sub>3</sub> |
| 956. NLIMO <sub>2</sub> + C <sub>10</sub> H <sub>15</sub> O <sub>11</sub> O <sub>2</sub> → C <sub>20</sub> H <sub>31</sub> O <sub>13</sub> NO <sub>3</sub>                             | 5E-12 | HOM dimers containing NO <sub>3</sub> |
| 957. NLIMALO <sub>2</sub> + C <sub>10</sub> H <sub>15</sub> O <sub>11</sub> O <sub>2</sub> → C <sub>20</sub> H <sub>31</sub> O <sub>14</sub> NO <sub>3</sub>                           | 5E-12 | HOM dimers containing NO <sub>3</sub> |
| 958. NC <sub>9</sub> I <sub>1</sub> CO <sub>3</sub> + C <sub>10</sub> H <sub>15</sub> O <sub>11</sub> O <sub>2</sub> → C <sub>20</sub> H <sub>31</sub> O <sub>14</sub> NO <sub>3</sub> | 5E-12 | HOM dimers containing NO <sub>3</sub> |
| 959. NBPINAO <sub>2</sub> + C <sub>10</sub> H <sub>15</sub> O <sub>11</sub> O <sub>2</sub> → C <sub>20</sub> H <sub>31</sub> O <sub>13</sub> NO <sub>3</sub>                           | 5E-12 | HOM dimers containing NO <sub>3</sub> |
| 960. NBPINBO <sub>2</sub> + C <sub>10</sub> H <sub>15</sub> O <sub>11</sub> O <sub>2</sub> → C <sub>20</sub> H <sub>31</sub> O <sub>13</sub> NO <sub>3</sub>                           | 5E-12 | HOM dimers containing NO <sub>3</sub> |
|                                                                                                                                                                                        |       |                                       |
| 961. C <sub>9</sub> O <sub>2</sub> + C <sub>10</sub> H <sub>15</sub> O <sub>11</sub> O <sub>2</sub> → C <sub>19</sub> H <sub>28</sub> O <sub>14</sub>                                  | 5E-12 |                                       |
| 962. C <sub>8</sub> O <sub>3</sub> + C <sub>10</sub> H <sub>15</sub> O <sub>11</sub> O <sub>2</sub> → C <sub>19</sub> H <sub>28</sub> O <sub>15</sub>                                  | 5E-12 |                                       |
| 963. C <sub>9</sub> O <sub>2</sub> + C <sub>10</sub> H <sub>15</sub> O <sub>11</sub> O <sub>2</sub> → C <sub>19</sub> H <sub>28</sub> O <sub>15</sub>                                  | 5E-12 |                                       |
| 964. C <sub>9</sub> O <sub>2</sub> + C <sub>10</sub> H <sub>15</sub> O <sub>11</sub> O <sub>2</sub> → C <sub>19</sub> H <sub>28</sub> O <sub>15</sub>                                  | 5E-12 |                                       |
| 965. C <sub>8</sub> O <sub>3</sub> + C <sub>10</sub> H <sub>15</sub> O <sub>11</sub> O <sub>2</sub> → C <sub>19</sub> H <sub>28</sub> O <sub>15</sub>                                  | 5E-12 |                                       |
| 966. C <sub>8</sub> I <sub>1</sub> CO <sub>3</sub> + C <sub>10</sub> H <sub>15</sub> O <sub>11</sub> O <sub>2</sub> → C <sub>19</sub> H <sub>28</sub> O <sub>16</sub>                  | 5E-12 |                                       |
| 967. C <sub>9</sub> I <sub>0</sub> O <sub>2</sub> + C <sub>10</sub> H <sub>15</sub> O <sub>11</sub> O <sub>2</sub> → C <sub>19</sub> H <sub>28</sub> O <sub>16</sub>                   | 5E-12 |                                       |
| 968. C <sub>9</sub> O <sub>2</sub> + C <sub>10</sub> H <sub>15</sub> O <sub>11</sub> O <sub>2</sub> → C <sub>19</sub> H <sub>28</sub> O <sub>16</sub>                                  | 5E-12 |                                       |
| 969. C <sub>9</sub> I <sub>2</sub> O <sub>2</sub> + C <sub>10</sub> H <sub>15</sub> O <sub>11</sub> O <sub>2</sub> → C <sub>19</sub> H <sub>28</sub> O <sub>17</sub>                   | 5E-12 |                                       |
| 970. C <sub>9</sub> I <sub>3</sub> O <sub>2</sub> + C <sub>10</sub> H <sub>15</sub> O <sub>11</sub> O <sub>2</sub> → C <sub>19</sub> H <sub>28</sub> O <sub>14</sub>                   | 5E-12 |                                       |
| 971. C <sub>9</sub> I <sub>4</sub> O <sub>2</sub> + C <sub>10</sub> H <sub>15</sub> O <sub>11</sub> O <sub>2</sub> → C <sub>19</sub> H <sub>28</sub> O <sub>15</sub>                   | 5E-12 |                                       |
| 972. C <sub>8</sub> I <sub>6</sub> CO <sub>3</sub> + C <sub>10</sub> H <sub>15</sub> O <sub>11</sub> O <sub>2</sub> → C <sub>19</sub> H <sub>28</sub> O <sub>15</sub>                  | 5E-12 |                                       |
| 973. NORLIMO <sub>2</sub> + C <sub>10</sub> H <sub>15</sub> O <sub>11</sub> O <sub>2</sub> → C <sub>19</sub> H <sub>28</sub> O <sub>16</sub>                                           | 5E-12 |                                       |
| 974. LMKAO <sub>2</sub> + C <sub>10</sub> H <sub>15</sub> O <sub>11</sub> O <sub>2</sub> → C <sub>19</sub> H <sub>28</sub> O <sub>15</sub>                                             | 5E-12 |                                       |
| 975. LMKBO <sub>2</sub> + C <sub>10</sub> H <sub>15</sub> O <sub>11</sub> O <sub>2</sub> → C <sub>19</sub> H <sub>28</sub> O <sub>15</sub>                                             | 5E-12 |                                       |
| 976. C <sub>9</sub> I <sub>2</sub> O <sub>2</sub> + C <sub>10</sub> H <sub>15</sub> O <sub>11</sub> O <sub>2</sub> → C <sub>19</sub> H <sub>28</sub> O <sub>16</sub>                   | 5E-12 |                                       |
| 977. C <sub>8</sub> I <sub>7</sub> CO <sub>3</sub> + C <sub>10</sub> H <sub>15</sub> O <sub>11</sub> O <sub>2</sub> → C <sub>19</sub> H <sub>28</sub> O <sub>16</sub>                  | 5E-12 |                                       |
| 978. LMLKAO <sub>2</sub> + C <sub>10</sub> H <sub>15</sub> O <sub>11</sub> O <sub>2</sub> → C <sub>19</sub> H <sub>28</sub> O <sub>16</sub>                                            | 5E-12 |                                       |
| 979. LMLKBO <sub>2</sub> + C <sub>10</sub> H <sub>15</sub> O <sub>11</sub> O <sub>2</sub> → C <sub>19</sub> H <sub>28</sub> O <sub>16</sub>                                            | 5E-12 |                                       |
| 980. C <sub>8</sub> I <sub>3</sub> CO <sub>3</sub> + C <sub>10</sub> H <sub>15</sub> O <sub>11</sub> O <sub>2</sub> → C <sub>19</sub> H <sub>28</sub> O <sub>16</sub>                  | 5E-12 |                                       |
| 981. C <sub>9</sub> I <sub>5</sub> O <sub>2</sub> + C <sub>10</sub> H <sub>15</sub> O <sub>11</sub> O <sub>2</sub> → C <sub>19</sub> H <sub>28</sub> O <sub>17</sub>                   | 5E-12 |                                       |
| 982. NOPINAO <sub>2</sub> + C <sub>10</sub> H <sub>15</sub> O <sub>11</sub> O <sub>2</sub> → C <sub>19</sub> H <sub>28</sub> O <sub>14</sub>                                           | 5E-12 |                                       |
| 983. NOPINBO <sub>2</sub> + C <sub>10</sub> H <sub>15</sub> O <sub>11</sub> O <sub>2</sub> → C <sub>19</sub> H <sub>28</sub> O <sub>14</sub>                                           | 5E-12 |                                       |
| 984. NOPINCO <sub>2</sub> + C <sub>10</sub> H <sub>15</sub> O <sub>11</sub> O <sub>2</sub> → C <sub>19</sub> H <sub>28</sub> O <sub>14</sub>                                           | 5E-12 |                                       |
| 985. NOPINDO <sub>2</sub> + C <sub>10</sub> H <sub>15</sub> O <sub>11</sub> O <sub>2</sub> → C <sub>19</sub> H <sub>28</sub> O <sub>14</sub>                                           | 5E-12 |                                       |
| 986. C <sub>9</sub> I <sub>8</sub> O <sub>2</sub> + C <sub>10</sub> H <sub>15</sub> O <sub>11</sub> O <sub>2</sub> → C <sub>19</sub> H <sub>28</sub> O <sub>15</sub>                   | 5E-12 |                                       |
| 987. C <sub>9</sub> I <sub>0</sub> CO <sub>2</sub> + C <sub>10</sub> H <sub>15</sub> O <sub>11</sub> O <sub>2</sub> → C <sub>19</sub> H <sub>28</sub> O <sub>15</sub>                  | 5E-12 |                                       |
| 988. C <sub>9</sub> I <sub>5</sub> O <sub>2</sub> + C <sub>10</sub> H <sub>15</sub> O <sub>11</sub> O <sub>2</sub> → C <sub>19</sub> H <sub>28</sub> O <sub>15</sub>                   | 5E-12 |                                       |
| 989. C <sub>9</sub> I <sub>7</sub> O <sub>2</sub> + C <sub>10</sub> H <sub>15</sub> O <sub>11</sub> O <sub>2</sub> → C <sub>19</sub> H <sub>28</sub> O <sub>15</sub>                   | 5E-12 |                                       |
| 990. C <sub>9</sub> I <sub>9</sub> O <sub>2</sub> + C <sub>10</sub> H <sub>15</sub> O <sub>11</sub> O <sub>2</sub> → C <sub>19</sub> H <sub>28</sub> O <sub>16</sub>                   | 5E-12 |                                       |
| 991. C <sub>9</sub> I <sub>4</sub> O <sub>2</sub> + C <sub>10</sub> H <sub>15</sub> O <sub>11</sub> O <sub>2</sub> → C <sub>19</sub> H <sub>28</sub> O <sub>16</sub>                   | 5E-12 |                                       |
| 992. C <sub>9</sub> I <sub>6</sub> O <sub>2</sub> + C <sub>10</sub> H <sub>15</sub> O <sub>11</sub> O <sub>2</sub> → C <sub>19</sub> H <sub>28</sub> O <sub>16</sub>                   | 5E-12 |                                       |
| 993. C <sub>8</sub> I <sub>8</sub> CO <sub>3</sub> + C <sub>10</sub> H <sub>15</sub> O <sub>11</sub> O <sub>2</sub> → C <sub>19</sub> H <sub>28</sub> O <sub>16</sub>                  | 5E-12 |                                       |
| 994. C <sub>8</sub> I <sub>7</sub> CO <sub>3</sub> + C <sub>10</sub> H <sub>15</sub> O <sub>11</sub> O <sub>2</sub> → C <sub>19</sub> H <sub>28</sub> O <sub>17</sub>                  | 5E-12 |                                       |
| 995. C <sub>8</sub> I <sub>2</sub> CO <sub>3</sub> + C <sub>10</sub> H <sub>15</sub> O <sub>11</sub> O <sub>2</sub> → C <sub>19</sub> H <sub>28</sub> O <sub>15</sub>                  | 5E-12 |                                       |
| 996. NLMKAO <sub>2</sub> + C <sub>10</sub> H <sub>15</sub> O <sub>11</sub> O <sub>2</sub> → C <sub>19</sub> H <sub>29</sub> O <sub>14</sub> NO <sub>3</sub>                            | 5E-12 |                                       |
|                                                                                                                                                                                        |       |                                       |
| 997. C <sub>8</sub> O <sub>2</sub> + C <sub>10</sub> H <sub>15</sub> O <sub>11</sub> O <sub>2</sub> → C <sub>18</sub> H <sub>26</sub> O <sub>14</sub>                                  | 5E-12 |                                       |
| 998. C <sub>8</sub> O <sub>2</sub> + C <sub>10</sub> H <sub>15</sub> O <sub>11</sub> O <sub>2</sub> → C <sub>18</sub> H <sub>26</sub> O <sub>14</sub>                                  | 5E-12 |                                       |
| 999. C <sub>8</sub> O <sub>2</sub> + C <sub>10</sub> H <sub>15</sub> O <sub>11</sub> O <sub>2</sub> → C <sub>18</sub> H <sub>26</sub> O <sub>15</sub>                                  | 5E-12 |                                       |
| 1000. C <sub>8</sub> I <sub>1</sub> O <sub>2</sub> + C <sub>10</sub> H <sub>15</sub> O <sub>11</sub> O <sub>2</sub> → C <sub>18</sub> H <sub>26</sub> O <sub>15</sub>                  | 5E-12 |                                       |
| 1001. C <sub>8</sub> I <sub>0</sub> O <sub>2</sub> + C <sub>10</sub> H <sub>15</sub> O <sub>11</sub> O <sub>2</sub> → C <sub>18</sub> H <sub>26</sub> O <sub>15</sub>                  | 5E-12 |                                       |
| 1002. C <sub>8</sub> I <sub>2</sub> O <sub>2</sub> + C <sub>10</sub> H <sub>15</sub> O <sub>11</sub> O <sub>2</sub> → C <sub>18</sub> H <sub>26</sub> O <sub>16</sub>                  | 5E-12 |                                       |
| 1003. C <sub>8</sub> I <sub>3</sub> O <sub>2</sub> + C <sub>10</sub> H <sub>15</sub> O <sub>11</sub> O <sub>2</sub> → C <sub>18</sub> H <sub>26</sub> O <sub>14</sub>                  | 5E-12 |                                       |
| 1004. C <sub>7</sub> I <sub>2</sub> CO <sub>3</sub> + C <sub>10</sub> H <sub>15</sub> O <sub>11</sub> O <sub>2</sub> → C <sub>18</sub> H <sub>26</sub> O <sub>15</sub>                 | 5E-12 |                                       |
| 1005. C <sub>8</sub> I <sub>6</sub> O <sub>2</sub> + C <sub>10</sub> H <sub>15</sub> O <sub>11</sub> O <sub>2</sub> → C <sub>18</sub> H <sub>26</sub> O <sub>14</sub>                  | 5E-12 |                                       |
| 1006. C <sub>8</sub> I <sub>7</sub> O <sub>2</sub> + C <sub>10</sub> H <sub>15</sub> O <sub>11</sub> O <sub>2</sub> → C <sub>18</sub> H <sub>26</sub> O <sub>15</sub>                  | 5E-12 |                                       |
| 1007. C <sub>8</sub> I <sub>2</sub> O <sub>2</sub> + C <sub>10</sub> H <sub>15</sub> O <sub>11</sub> O <sub>2</sub> → C <sub>18</sub> H <sub>26</sub> O <sub>16</sub>                  | 5E-12 |                                       |
| 1008. C <sub>8</sub> I <sub>2</sub> O <sub>2</sub> + C <sub>10</sub> H <sub>15</sub> O <sub>11</sub> O <sub>2</sub> → C <sub>18</sub> H <sub>26</sub> O <sub>14</sub>                  | 5E-12 |                                       |
| 1009. C <sub>8</sub> I <sub>8</sub> O <sub>2</sub> + C <sub>10</sub> H <sub>15</sub> O <sub>11</sub> O <sub>2</sub> → C <sub>18</sub> H <sub>26</sub> O <sub>16</sub>                  | 5E-12 |                                       |
| 1010. C <sub>8</sub> I <sub>3</sub> O <sub>2</sub> + C <sub>10</sub> H <sub>15</sub> O <sub>11</sub> O <sub>2</sub> → C <sub>18</sub> H <sub>26</sub> O <sub>15</sub>                  | 5E-12 |                                       |
| 1011. C <sub>8</sub> I <sub>9</sub> O <sub>2</sub> + C <sub>10</sub> H <sub>15</sub> O <sub>11</sub> O <sub>2</sub> → C <sub>18</sub> H <sub>26</sub> O <sub>16</sub>                  | 5E-12 |                                       |
| 1012. C <sub>7</sub> I <sub>2</sub> CO <sub>3</sub> + C <sub>10</sub> H <sub>15</sub> O <sub>11</sub> O <sub>2</sub> → C <sub>18</sub> H <sub>26</sub> O <sub>16</sub>                 | 5E-12 |                                       |
| 1013. C <sub>7</sub> I <sub>3</sub> CO <sub>3</sub> + C <sub>10</sub> H <sub>15</sub> O <sub>11</sub> O <sub>2</sub> → C <sub>18</sub> H <sub>26</sub> O <sub>16</sub>                 | 5E-12 |                                       |
| 1014. C <sub>8</sub> I <sub>4</sub> O <sub>2</sub> + C <sub>10</sub> H <sub>15</sub> O <sub>11</sub> O <sub>2</sub> → C <sub>18</sub> H <sub>26</sub> O <sub>15</sub>                  | 5E-12 |                                       |
| 1015. C <sub>8</sub> I <sub>0</sub> O <sub>2</sub> + C <sub>10</sub> H <sub>15</sub> O <sub>11</sub> O <sub>2</sub> → C <sub>18</sub> H <sub>26</sub> O <sub>17</sub>                  | 5E-12 |                                       |
| 1016. C <sub>8</sub> I <sub>5</sub> O <sub>2</sub> + C <sub>10</sub> H <sub>15</sub> O <sub>11</sub> O <sub>2</sub> → C <sub>18</sub> H <sub>26</sub> O <sub>16</sub>                  | 5E-12 |                                       |
| 1017. C <sub>8</sub> I <sub>1</sub> O <sub>2</sub> + C <sub>10</sub> H <sub>15</sub> O <sub>11</sub> O <sub>2</sub> → C <sub>18</sub> H <sub>26</sub> O <sub>16</sub>                  | 5E-12 |                                       |
| 1018. C <sub>7</sub> I <sub>3</sub> CO <sub>3</sub> + C <sub>10</sub> H <sub>15</sub> O <sub>11</sub> O <sub>2</sub> → C <sub>18</sub> H <sub>26</sub> O <sub>17</sub>                 | 5E-12 |                                       |
| 1019. C <sub>8</sub> BCO <sub>2</sub> + C <sub>10</sub> H <sub>15</sub> O <sub>11</sub> O <sub>2</sub> → C <sub>18</sub> H <sub>26</sub> O <sub>13</sub>                               | 5E-12 |                                       |
| 1020. C <sub>8</sub> O <sub>2</sub> + C <sub>10</sub> H <sub>15</sub> O <sub>11</sub> O <sub>2</sub> → C <sub>18</sub> H <sub>26</sub> O <sub>15</sub>                                 | 5E-12 |                                       |

|                                             |       |                                       |
|---------------------------------------------|-------|---------------------------------------|
| 1021. C718CO3 + C10H15O11O2 → C18H26O16     | 5E-12 |                                       |
| 1022. C87O2 + C10H15O11O2 → C18H26O16       | 5E-12 |                                       |
| 1023. C721CO3 + C10H15O11O2 → C18H26O16     | 5E-12 |                                       |
| 1024. NC826O2 + C10H15O11O2 → C18H27O15NO3  | 5E-12 |                                       |
|                                             |       |                                       |
| 1025. APINAO2 + C10H15O12O2 → C20H30O15     | 5E-12 |                                       |
| 1026. APINBO2 + C10H15O12O2 → C20H30O15     | 5E-12 |                                       |
| 1027. APINCO2 + C10H15O12O2 → C20H30O15     | 5E-12 |                                       |
| 1028. C107O2 + C10H15O12O2 → C20H30O16      | 5E-12 |                                       |
| 1029. C109O2 + C10H15O12O2 → C20H30O16      | 5E-12 |                                       |
| 1030. C106O2 + C10H15O12O2 → C20H30O17      | 5E-12 |                                       |
| 1031. C920CO3 + C10H15O12O2 → C20H30O17     | 5E-12 |                                       |
| 1032. C108O2 + C10H15O12O2 → C20H30O17      | 5E-12 |                                       |
| 1033. PINALO2 + C10H15O12O2 → C20H30O16     | 5E-12 |                                       |
| 1034. C96CO3 + C10H15O12O2 → C20H30O16      | 5E-12 |                                       |
| 1035. C923CO3 + C10H15O12O2 → C20H30O16     | 5E-12 |                                       |
| 1036. LIMAO2 + C10H15O12O2 → C20H30O15      | 5E-12 |                                       |
| 1037. LIMALBO2 + C10H15O12O2 → C20H30O16    | 5E-12 |                                       |
| 1038. LIMCO2 + C10H15O12O2 → C20H30O15      | 5E-12 |                                       |
| 1039. LIMALO2 + C10H15O12O2 → C20H30O16     | 5E-12 |                                       |
| 1040. LIMBO2 + C10H15O12O2 → C20H30O15      | 5E-12 |                                       |
| 1041. LIMALAO2 + C10H15O12O2 → C20H30O16    | 5E-12 |                                       |
| 1042. BPINAO2 + C10H15O12O2 → C20H30O15     | 5E-12 |                                       |
| 1043. BPINBO2 + C10H15O12O2 → C20H30O15     | 5E-12 |                                       |
| 1044. BPINCO2 + C10H15O12O2 → C20H30O15     | 5E-12 |                                       |
| 1045. C918CO3 + C10H15O12O2 → C20H30O16     | 5E-12 |                                       |
| 1046. NAPINAO2 + C10H15O12O2 → C20H31O14NO3 | 5E-12 | HOM dimers containing NO <sub>3</sub> |
| 1047. NAPINBO2 + C10H15O12O2 → C20H31O14NO3 | 5E-12 | HOM dimers containing NO <sub>3</sub> |
| 1048. NC102O2 + C10H15O12O2 → C20H31O15NO3  | 5E-12 | HOM dimers containing NO <sub>3</sub> |
| 1049. NC101O2 + C10H15O12O2 → C20H31O15NO3  | 5E-12 | HOM dimers containing NO <sub>3</sub> |
| 1050. NLIMO2 + C10H15O12O2 → C20H31O14NO3   | 5E-12 | HOM dimers containing NO <sub>3</sub> |
| 1051. NLIMALO2 + C10H15O12O2 → C20H31O15NO3 | 5E-12 | HOM dimers containing NO <sub>3</sub> |
| 1052. NC91CO3 + C10H15O12O2 → C20H31O15NO3  | 5E-12 | HOM dimers containing NO <sub>3</sub> |
| 1053. NBPINAO2 + C10H15O12O2 → C20H31O14NO3 | 5E-12 | HOM dimers containing NO <sub>3</sub> |
| 1054. NBPINBO2 + C10H15O12O2 → C20H31O14NO3 | 5E-12 | HOM dimers containing NO <sub>3</sub> |
|                                             |       |                                       |
| 1055. C96O2 + C10H15O12O2 → C19H28O15       | 5E-12 |                                       |
| 1056. C89CO3 + C10H15O12O2 → C19H28O16      | 5E-12 |                                       |
| 1057. C920O2 + C10H15O12O2 → C19H28O16      | 5E-12 |                                       |
| 1058. C97O2 + C10H15O12O2 → C19H28O16       | 5E-12 |                                       |
| 1059. C85CO3 + C10H15O12O2 → C19H28O16      | 5E-12 |                                       |
| 1060. C811CO3 + C10H15O12O2 → C19H28O17     | 5E-12 |                                       |
| 1061. C921O2 + C10H15O12O2 → C19H28O17      | 5E-12 |                                       |
| 1062. C98O2 + C10H15O12O2 → C19H28O17       | 5E-12 |                                       |
| 1063. C922O2+ C10H15O12O2 → C19H28O18       | 5E-12 |                                       |
| 1064. C923O2 + C10H15O12O2 → C19H28O15      | 5E-12 |                                       |
| 1065. C924O2 + C10H15O12O2 → C19H28O16      | 5E-12 |                                       |
| 1066. C816CO3 + C10H15O12O2 → C19H28O16     | 5E-12 |                                       |
| 1067. NORLIMO2 + C10H15O12O2 → C19H28O17    | 5E-12 |                                       |
| 1068. LMKAO2 + C10H15O12O2 → C19H28O16      | 5E-12 |                                       |
| 1069. LMKBO2 + C10H15O12O2 → C19H28O16      | 5E-12 |                                       |
| 1070. C926O2 + C10H15O12O2 → C19H28O17      | 5E-12 |                                       |
| 1071. C817CO3 + C10H15O12O2 → C19H28O17     | 5E-12 |                                       |
| 1072. LMLKAO2 + C10H15O12O2 → C19H28O17     | 5E-12 |                                       |
| 1073. LMLKBO2 + C10H15O12O2 → C19H28O17     | 5E-12 |                                       |
| 1074. C823CO3 + C10H15O12O2 → C19H28O17     | 5E-12 |                                       |
| 1075. C925O2 + C10H15O12O2 → C19H28O18      | 5E-12 |                                       |
| 1076. NOPINAO2+ C10H15O12O2 → C19H28O15     | 5E-12 |                                       |
| 1077. NOPINBO2+ C10H15O12O2 → C19H28O15     | 5E-12 |                                       |
| 1078. NOPINCO2+ C10H15O12O2 → C19H28O15     | 5E-12 |                                       |
| 1079. NOPINDO2+ C10H15O12O2 → C19H28O15     | 5E-12 |                                       |
| 1080. C918O2+ C10H15O12O2 → C19H28O16       | 5E-12 |                                       |
| 1081. C9DCO2+ C10H15O12O2 → C19H28O16       | 5E-12 |                                       |
| 1082. C915O2+ C10H15O12O2 → C19H28O16       | 5E-12 |                                       |
| 1083. C917O2+ C10H15O12O2 → C19H28O16       | 5E-12 |                                       |
| 1084. C919O2+ C10H15O12O2 → C19H28O17       | 5E-12 |                                       |
| 1085. C914O2+ C10H15O12O2 → C19H28O17       | 5E-12 |                                       |
| 1086. C916O2+ C10H15O12O2 → C19H28O17       | 5E-12 |                                       |
| 1087. C88CO3+ C10H15O12O2 → C19H28O17       | 5E-12 |                                       |
| 1088. C87CO3+ C10H15O12O2 → C19H28O18       | 5E-12 |                                       |
| 1089. C822CO3+ C10H15O12O2 → C19H28O16      | 5E-12 |                                       |
| 1090. NLMKAO2+ C10H15O12O2 → C19H29O15NO3   | 5E-12 |                                       |
|                                             |       |                                       |
| 1091. C85O2 + C10H15O12O2 → C18H26O15       | 5E-12 |                                       |

|                                            |       |
|--------------------------------------------|-------|
| 1092. C89O2 + C10H15O12O2 → C18H26O15      | 5E-12 |
| 1093. C86O2 + C10H15O12O2 → C18H26O16      | 5E-12 |
| 1094. C811O2 + C10H15O12O2 → C18H26O16     | 5E-12 |
| 1095. C810O2 + C10H15O12O2 → C18H26O16     | 5E-12 |
| 1096. C812O2 + C10H15O12O2 → C18H26O17     | 5E-12 |
| 1097. C813O2 + C10H15O12O2 → C18H26O15     | 5E-12 |
| 1098. C729CO3 + C10H15O12O2 → C18H26O16    | 5E-12 |
| 1099. C816O2 + C10H15O12O2 → C18H26O15     | 5E-12 |
| 1100. C817O2 + C10H15O12O2 → C18H26O16     | 5E-12 |
| 1101. C826O2 + C10H15O12O2 → C18H26O17     | 5E-12 |
| 1102. C822O2 + C10H15O12O2 → C18H26O15     | 5E-12 |
| 1103. C818O2 + C10H15O12O2 → C18H26O17     | 5E-12 |
| 1104. C823O2 + C10H15O12O2 → C18H26O16     | 5E-12 |
| 1105. C819O2 + C10H15O12O2 → C18H26O17     | 5E-12 |
| 1106. C727CO3 + C10H15O12O2 → C18H26O17    | 5E-12 |
| 1107. C731CO3 + C10H15O12O2 → C18H26O17    | 5E-12 |
| 1108. C824O2 + C10H15O12O2 → C18H26O16     | 5E-12 |
| 1109. C820O2 + C10H15O12O2 → C18H26O18     | 5E-12 |
| 1110. C825O2 + C10H15O12O2 → C18H26O17     | 5E-12 |
| 1111. C821O2 + C10H15O12O2 → C18H26O17     | 5E-12 |
| 1112. C732CO3 + C10H15O12O2 → C18H26O18    | 5E-12 |
| 1113. C8BCO2 + C10H15O12O2 → C18H26O14     | 5E-12 |
| 1114. C88O2 + C10H15O12O2 → C18H26O16      | 5E-12 |
| 1115. C718CO3 + C10H15O12O2 → C18H26O17    | 5E-12 |
| 1116. C87O2 + C10H15O12O2 → C18H26O17      | 5E-12 |
| 1117. C721CO3 + C10H15O12O2 → C18H26O17    | 5E-12 |
| 1118. NC826O2 + C10H15O12O2 → C18H27O16NO3 | 5E-12 |

**Autoxidation peroxy radicals reacting with other peroxy radicals with different branching ratios for a, b and c:**

|                                 |                                              |                         |  |  |
|---------------------------------|----------------------------------------------|-------------------------|--|--|
|                                 | $R_1O_2 + R_2O_2 \rightarrow R_1C=O + R_2OH$ | (a)                     |  |  |
|                                 | $\rightarrow R_1OH + R_2C=O$                 | (b)                     |  |  |
|                                 | $\rightarrow R_1O + R_2O + O_2$              | (c)                     |  |  |
| 1119. C10H15O2O2 → C10H14O3     | 1E-12*0.2*RO2                                | RO2 = $\sum$ RO2 in MCM |  |  |
| 1120. C10H15O2O2 → C10H15O2O    | 1E-12*0.6*RO2                                | RO2 = $\sum$ RO2 in MCM |  |  |
| 1121. C10H15O2O2 → C10H16O3     | 1E-12*0.2*RO2                                | RO2 = $\sum$ RO2 in MCM |  |  |
| 1122. C10H15O3O2 → C10H14O4     | 5E-12*0.2*RO2                                | RO2 = $\sum$ RO2 in MCM |  |  |
| 1123. C10H15O3O2 → C10H15O3O    | 5E-12*0.6*RO2                                | RO2 = $\sum$ RO2 in MCM |  |  |
| 1124. C10H15O3O2 → C10H16O4iso1 | 5E-12*0.2*RO2                                | RO2 = $\sum$ RO2 in MCM |  |  |
| 1125. C10H15O4O2 → C10H14O5     | 5E-12*0.2*RO2                                | RO2 = $\sum$ RO2 in MCM |  |  |
| 1126. C10H15O4O2 → C10H15O4O    | 5E-12*0.6*RO2                                | RO2 = $\sum$ RO2 in MCM |  |  |
| 1127. C10H15O4O2 → C10H16O5iso1 | 5E-12*0.2*RO2                                | RO2 = $\sum$ RO2 in MCM |  |  |
| 1128. C10H15O5O2 → C10H14O6     | 5E-12*0.2*RO2                                | RO2 = $\sum$ RO2 in MCM |  |  |
| 1129. C10H15O5O2 → C10H15O5O    | 5E-12*0.6*RO2                                | RO2 = $\sum$ RO2 in MCM |  |  |
| 1130. C10H15O5O2 → C10H16O6iso1 | 5E-12*0.2*RO2                                | RO2 = $\sum$ RO2 in MCM |  |  |
| 1131. C10H15O6O2 → C10H14O7     | 7E-12*0.4*RO2                                | RO2 = $\sum$ RO2 in MCM |  |  |
| 1132. C10H15O6O2 → C10H15O6O    | 7E-12*0.4*RO2                                | RO2 = $\sum$ RO2 in MCM |  |  |
| 1133. C10H15O6O2 → C10H16O7iso1 | 7E-12*0.2*RO2                                | RO2 = $\sum$ RO2 in MCM |  |  |
| 1134. C10H15O7O2 → C10H14O8     | 8E-12*0.2*RO2                                | RO2 = $\sum$ RO2 in MCM |  |  |
| 1135. C10H15O7O2 → C10H15O7O    | 8E-12*0.4*RO2                                | RO2 = $\sum$ RO2 in MCM |  |  |
| 1136. C10H15O7O2 → C10H16O8iso1 | 8E-12*0.4*RO2                                | RO2 = $\sum$ RO2 in MCM |  |  |
| 1137. C10H15O8O2 → C10H14O9     | 9E-12*0.4*RO2                                | RO2 = $\sum$ RO2 in MCM |  |  |
| 1138. C10H15O8O2 → C10H15O8O    | 9E-12*0.2*RO2                                | RO2 = $\sum$ RO2 in MCM |  |  |
| 1139. C10H15O8O2 → C10H16O9iso1 | 9E-12*0.4*RO2                                | RO2 = $\sum$ RO2 in MCM |  |  |
| 1140. C10H15O9O2 → C10H14O10    | 1E-11*0.3*RO2                                | RO2 = $\sum$ RO2 in MCM |  |  |
| 1141. C10H15O9O2 → C10H15O9O    | 1E-11*0.2*RO2                                | RO2 = $\sum$ RO2 in MCM |  |  |
| 1142. C10H15O9O2 → C10H16O10    | 1E-11*0.5*RO2                                | RO2 = $\sum$ RO2 in MCM |  |  |
| 1143. C10H15O10O2 → C10H14O11   | 1E-11*0.5*RO2                                | RO2 = $\sum$ RO2 in MCM |  |  |
| 1144. C10H15O10O2 → C10H15O10O  | 1E-11*0.2*RO2                                | RO2 = $\sum$ RO2 in MCM |  |  |
| 1145. C10H15O10O2 → C10H16O11   | 1E-11*0.3*RO2                                | RO2 = $\sum$ RO2 in MCM |  |  |
| 1146. C10H15O11O2 → C10H14O12   | 1E-11*0.4*RO2                                | RO2 = $\sum$ RO2 in MCM |  |  |
| 1147. C10H15O11O2 → C10H15O11O  | 1E-11*0.2*RO2                                | RO2 = $\sum$ RO2 in MCM |  |  |
| 1148. C10H15O11O2 → C10H16O12   | 1E-11*0.4*RO2                                | RO2 = $\sum$ RO2 in MCM |  |  |
| 1149. C10H15O12O2 → C10H14O13   | 1E-11*0.5*RO2                                | RO2 = $\sum$ RO2 in MCM |  |  |
| 1150. C10H15O12O2 → C10H15O12O  | 1E-11*0.0*RO2                                | RO2 = $\sum$ RO2 in MCM |  |  |

|                               |                  |                             |
|-------------------------------|------------------|-----------------------------|
| 1151. C10H15O12O2 → C10H16O13 | 1E-11*0.5*RO2    | RO2 = ∑ RO2 in MCM          |
| 1152. C107O2 → C10H15O2O      | 9.4E-14*RO2*0.1  | To PRAM, RO2 = ∑ RO2 in MCM |
| 1153. C107O2 → C107O          | 9.4E-14*RO2*0.63 | To MCM, RO2 = ∑ RO2 in MCM  |
| 1154. C107O2 → C107OH         | 9.4E-14*RO2*0.27 | To MCM, RO2 = ∑ RO2 in MCM  |

### Peroxy radical autoxidation and HOM formation after OH oxidation of monoterpenes (R1155-R1773)

#### Autoxidation reaction rates (H-shifts + O<sub>2</sub>)

|                               |                    |                      |
|-------------------------------|--------------------|----------------------|
| 1155. C10H17O3O2 → C10H17O5O2 | 2E17*EXP(-12077/T) | Unit s <sup>-1</sup> |
| 1156. C10H17O4O2 → C10H17O6O2 | 6E16*EXP(-12077/T) | Unit s <sup>-1</sup> |
| 1157. C10H17O5O2 → C10H17O7O2 | 6E16*EXP(-12077/T) | Unit s <sup>-1</sup> |
| 1158. C10H17O6O2 → C10H17O8O2 | 3E16*EXP(-12077/T) | Unit s <sup>-1</sup> |

#### Isomerization of alkoxy radicals (RO) followed by reaction with O<sub>2</sub> to make new peroxy radicals (RO· → ROH, ·ROH + O<sub>2</sub> → RO<sub>2</sub>)

|                              |      |                      |
|------------------------------|------|----------------------|
| 1159. C10H17O3O → C10H17O4O2 | KDEC | Unit s <sup>-1</sup> |
| 1160. C10H17O4O → C10H17O5O2 | KDEC | Unit s <sup>-1</sup> |
| 1161. C10H17O5O → C10H17O6O2 | KDEC | Unit s <sup>-1</sup> |
| 1162. C10H17O6O → C10H17O7O2 | KDEC | Unit s <sup>-1</sup> |
| 1163. C10H17O7O → C10H17O8O2 | KDEC | Unit s <sup>-1</sup> |

#### Peroxy radicals reacting with NO and forming an alkoxy radical and NO<sub>2</sub> (RO<sub>2</sub> + NO → RO + NO<sub>2</sub>)

The rate for the reactions between autoxidation RO<sub>2</sub> and NO was set to the same values used in MCMv3.3.1 (KRO2NO)

|                                         |            |
|-----------------------------------------|------------|
| 1164. C10H17O3O2 + NO → C10H17O3O + NO2 | KRO2NO*1.0 |
| 1165. C10H17O4O2 + NO → C10H17O4O + NO2 | KRO2NO*0.9 |
| 1166. C10H17O5O2 + NO → C10H17O5O + NO2 | KRO2NO*0.8 |
| 1167. C10H17O6O2 + NO → C10H17O6O + NO2 | KRO2NO*0.7 |
| 1168. C10H17O7O2 + NO → C10H17O7O + NO2 | KRO2NO*0.5 |

#### Lumped reactions describing the fragmentation of autoxidation products when they react with NO (RO<sub>2</sub> + NO → RO + NO<sub>2</sub>) followed by fast fragmentation of the formed alkoxy radicals).

The fragmentation products are assumed to be the MCM compounds C717O2 (a peroxy radical) and CH3COCH3 (acetone) irrespectively of which autoxidation peroxy radical that react with NO. This is a simplification that violates the mass balance for O atoms but not for the N and C atoms.

|                                                 |             |
|-------------------------------------------------|-------------|
| 1169. C10H17O3O2 + NO → C717O2 + CH3COCH3 + NO2 | 0.0         |
| 1170. C10H17O4O2 + NO → C717O2 + CH3COCH3 + NO2 | KRO2NO*0.04 |
| 1171. C10H17O5O2 + NO → C717O2 + CH3COCH3 + NO2 | KRO2NO*0.08 |
| 1172. C10H17O6O2 + NO → C717O2 + CH3COCH3 + NO2 | KRO2NO*0.12 |
| 1173. C10H17O7O2 + NO → C717O2 + CH3COCH3 + NO2 | KRO2NO*0.20 |
| 1174. C10H17O8O2 + NO → C717O2 + CH3COCH3 + NO2 | KRO2NO*0.40 |

#### Peroxy radicals reacting with NO forming monomers with an additional carbonyl group:

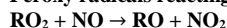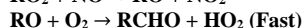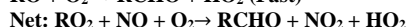

|                                                  |              |
|--------------------------------------------------|--------------|
| 1175. C10H17O3O2 + NO → C10H16O4iso2 + NO2 + HO2 | 0.0          |
| 1176. C10H17O4O2 + NO → C10H16O5iso2 + NO2 + HO2 | KRO2NO*0.042 |
| 1177. C10H17O5O2 + NO → C10H16O6iso2 + NO2 + HO2 | KRO2NO*0.084 |
| 1178. C10H17O6O2 + NO → C10H16O7iso2 + NO2 + HO2 | KRO2NO*0.126 |
| 1179. C10H17O7O2 + NO → C10H16O8iso2 + NO2 + HO2 | KRO2NO*0.21  |
| 1180. C10H17O8O2 + NO → C10H16O9iso2 + NO2 + HO2 | KRO2NO*0.42  |

#### Peroxy radicals reacting with NO forming compounds with a nitrate functional group (RO<sub>2</sub> + NO → RNO<sub>3</sub>)

|                                     |              |
|-------------------------------------|--------------|
| 1181. C10H17O3O2 + NO → C10H17O3NO3 | 0.0          |
| 1182. C10H17O4O2 + NO → C10H17O4NO3 | KRO2NO*0.018 |
| 1183. C10H17O5O2 + NO → C10H17O5NO3 | KRO2NO*0.036 |
| 1184. C10H17O6O2 + NO → C10H17O6NO3 | KRO2NO*0.054 |
| 1185. C10H17O7O2 + NO → C10H17O7NO3 | KRO2NO*0.090 |
| 1186. C10H17O8O2 + NO → C10H17O8NO3 | KRO2NO*0.180 |

#### Peroxy radicals reacting with HO<sub>2</sub> forming compounds with a hydrogen peroxide functional group (RO<sub>2</sub> + HO<sub>2</sub> → ROOH + O<sub>2</sub>)

|                                    |         |
|------------------------------------|---------|
| 1187. C10H17O3O2 + HO2 → C10H18O5  | KRO2HO2 |
| 1188. C10H17O4O2 + HO2 → C10H18O6  | KRO2HO2 |
| 1189. C10H17O5O2 + HO2 → C10H18O7  | KRO2HO2 |
| 1190. C10H17O6O2 + HO2 → C10H18O8  | KRO2HO2 |
| 1191. C10H17O7O2 + HO2 → C10H18O9  | KRO2HO2 |
| 1192. C10H17O8O2 + HO2 → C10H18O10 | KRO2HO2 |

#### Peroxy radicals reacting with other peroxy radicals forming dimers (RO<sub>2</sub> + RO<sub>2</sub> → ROOR + O<sub>2</sub>)

|                                       |       |
|---------------------------------------|-------|
| 1193. APINAO2 + C10H17O3O2 → C20H34O6 | 1E-13 |
| 1194. APINBO2 + C10H17O3O2 → C20H34O6 | 1E-13 |
| 1195. APINCO2 + C10H17O3O2 → C20H34O6 | 1E-13 |
| 1196. C107O2 + C10H17O3O2 → C20H34O7  | 1E-13 |
| 1197. C109O2 + C10H17O3O2 → C20H34O7  | 1E-13 |
| 1198. C106O2 + C10H17O3O2 → C20H34O8  | 1E-13 |

|                                           |       |                                       |
|-------------------------------------------|-------|---------------------------------------|
| 1199. C920CO3 + C10H17O3O2 → C20H34O8     | 1E-13 |                                       |
| 1200. C108O2 + C10H17O3O2 → C20H34O8      | 1E-13 |                                       |
| 1201. PINALO2 + C10H17O3O2 → C20H34O7     | 1E-13 |                                       |
| 1202. C96CO3 + C10H17O3O2 → C20H34O7      | 1E-13 |                                       |
| 1203. C923CO3 + C10H17O3O2 → C20H34O7     | 1E-13 |                                       |
| 1204. LIMA02 + C10H17O3O2 → C20H34O6      | 1E-13 |                                       |
| 1205. LIMALBO2 + C10H17O3O2 → C20H34O7    | 1E-13 |                                       |
| 1206. LIMCO2 + C10H17O3O2 → C20H34O6      | 1E-13 |                                       |
| 1207. LIMALO2 + C10H17O3O2 → C20H34O7     | 1E-13 |                                       |
| 1208. LIMBO2 + C10H17O3O2 → C20H34O6      | 1E-13 |                                       |
| 1209. LIMALAO2 + C10H17O3O2 → C20H34O7    | 1E-13 |                                       |
| 1210. BPINAO2 + C10H17O3O2 → C20H34O6     | 1E-13 |                                       |
| 1211. BPINBO2 + C10H17O3O2 → C20H34O6     | 1E-13 |                                       |
| 1212. BPINCO2 + C10H17O3O2 → C20H34O6     | 1E-13 |                                       |
| 1213. C918CO3 + C10H17O3O2 → C20H34O7     | 1E-13 |                                       |
| 1214. NAPINAO2 + C10H17O3O2 → C20H35O5NO3 | 1E-13 | HOM dimers containing NO <sub>3</sub> |
| 1215. NAPINBO2 + C10H17O3O2 → C20H35O5NO3 | 1E-13 | HOM dimers containing NO <sub>3</sub> |
| 1216. NC102O2 + C10H17O3O2 → C20H35O6NO3  | 1E-13 | HOM dimers containing NO <sub>3</sub> |
| 1217. NC101O2 + C10H17O3O2 → C20H35O6NO3  | 1E-13 | HOM dimers containing NO <sub>3</sub> |
| 1218. NLIMO2 + C10H17O3O2 → C20H35O5NO3   | 1E-13 | HOM dimers containing NO <sub>3</sub> |
| 1219. NLIMALO2 + C10H17O3O2 → C20H35O6NO3 | 1E-13 | HOM dimers containing NO <sub>3</sub> |
| 1220. NC91CO3 + C10H17O3O2 → C20H35O6NO3  | 1E-13 | HOM dimers containing NO <sub>3</sub> |
| 1221. NBPINAO2 + C10H17O3O2 → C20H35O5NO3 | 1E-13 | HOM dimers containing NO <sub>3</sub> |
| 1222. NBPINBO2 + C10H17O3O2 → C20H35O5NO3 | 1E-13 | HOM dimers containing NO <sub>3</sub> |
|                                           |       |                                       |
| 1223. C96O2 + C10H17O3O2 → C19H32O6       | 1E-13 |                                       |
| 1224. C89CO3 + C10H17O3O2 → C19H32O7      | 1E-13 |                                       |
| 1225. C920O2 + C10H17O3O2 → C19H32O7      | 1E-13 |                                       |
| 1226. C97O2 + C10H17O3O2 → C19H32O7       | 1E-13 |                                       |
| 1227. C85CO3 + C10H17O3O2 → C19H32O7      | 1E-13 |                                       |
| 1228. C811CO3 + C10H17O3O2 → C19H32O8     | 1E-13 |                                       |
| 1229. C921O2 + C10H17O3O2 → C19H32O8      | 1E-13 |                                       |
| 1230. C98O2 + C10H17O3O2 → C19H32O8       | 1E-13 |                                       |
| 1231. C922O2+ C10H17O3O2 → C19H32O9       | 1E-13 |                                       |
| 1232. C923O2 + C10H17O3O2 → C19H32O6      | 1E-13 |                                       |
| 1233. C924O2 + C10H17O3O2 → C19H32O7      | 1E-13 |                                       |
| 1234. C816CO3 + C10H17O3O2 → C19H32O7     | 1E-13 |                                       |
| 1235. NORLIMO2 + C10H17O3O2 → C19H32O8    | 1E-13 |                                       |
| 1236. LMKAO2 + C10H17O3O2 → C19H32O7      | 1E-13 |                                       |
| 1237. LMKBO2 + C10H17O3O2 → C19H32O7      | 1E-13 |                                       |
| 1238. C926O2 + C10H17O3O2 → C19H32O8      | 1E-13 |                                       |
| 1239. C817CO3 + C10H17O3O2 → C19H32O8     | 1E-13 |                                       |
| 1240. LMLKAO2 + C10H17O3O2 → C19H32O8     | 1E-13 |                                       |
| 1241. LMLKBO2 + C10H17O3O2 → C19H32O8     | 1E-13 |                                       |
| 1242. C823CO3 + C10H17O3O2 → C19H32O8     | 1E-13 |                                       |
| 1243. C925O2 + C10H17O3O2 → C19H32O9      | 1E-13 |                                       |
| 1244. NOPINAO2+ C10H17O3O2 → C19H32O6     | 1E-13 |                                       |
| 1245. NOPINBO2+ C10H17O3O2 → C19H32O6     | 1E-13 |                                       |
| 1246. NOPINCO2+ C10H17O3O2 → C19H32O6     | 1E-13 |                                       |
| 1247. NOPINDO2+ C10H17O3O2 → C19H32O6     | 1E-13 |                                       |
| 1248. C918O2+ C10H17O3O2 → C19H32O7       | 1E-13 |                                       |
| 1249. C9DCO2+ C10H17O3O2 → C19H32O7       | 1E-13 |                                       |
| 1250. C915O2+ C10H17O3O2 → C19H32O7       | 1E-13 |                                       |
| 1251. C917O2+ C10H17O3O2 → C19H32O7       | 1E-13 |                                       |
| 1252. C919O2+ C10H17O3O2 → C19H32O8       | 1E-13 |                                       |
| 1253. C914O2+ C10H17O3O2 → C19H32O8       | 1E-13 |                                       |
| 1254. C916O2+ C10H17O3O2 → C19H32O8       | 1E-13 |                                       |
| 1255. C88CO3+ C10H17O3O2 → C19H32O8       | 1E-13 |                                       |
| 1256. C87CO3+ C10H17O3O2 → C19H32O9       | 1E-13 |                                       |
| 1257. C822CO3+ C10H17O3O2 → C19H32O7      | 1E-13 |                                       |
| 1258. NLMKAO2+ C10H17O3O2 → C19H33O6NO3   | 1E-13 |                                       |
|                                           |       |                                       |
| 1259. C85O2 + C10H17O3O2 → C18H30O6       | 1E-13 |                                       |
| 1260. C89O2 + C10H17O3O2 → C18H30O6       | 1E-13 |                                       |
| 1261. C86O2 + C10H17O3O2 → C18H30O7       | 1E-13 |                                       |
| 1262. C811O2 + C10H17O3O2 → C18H30O7      | 1E-13 |                                       |
| 1263. C810O2 + C10H17O3O2 → C18H30O7      | 1E-13 |                                       |
| 1264. C812O2 + C10H17O3O2 → C18H30O8      | 1E-13 |                                       |
| 1265. C813O2 + C10H17O3O2 → C18H30O6      | 1E-13 |                                       |
| 1266. C729CO3 + C10H17O3O2 → C18H30O7     | 1E-13 |                                       |
| 1267. C816O2 + C10H17O3O2 → C18H30O6      | 1E-13 |                                       |
| 1268. C817O2 + C10H17O3O2 → C18H30O7      | 1E-13 |                                       |
| 1269. C826O2 + C10H17O3O2 → C18H30O8      | 1E-13 |                                       |
| 1270. C822O2 + C10H17O3O2 → C18H30O6      | 1E-13 |                                       |

|                                           |       |                                       |
|-------------------------------------------|-------|---------------------------------------|
| 1271. C818O2 + C10H17O3O2 → C18H30O8      | 1E-13 |                                       |
| 1272. C823O2 + C10H17O3O2 → C18H30O7      | 1E-13 |                                       |
| 1273. C819O2 + C10H17O3O2 → C18H30O8      | 1E-13 |                                       |
| 1274. C727CO3 + C10H17O3O2 → C18H30O8     | 1E-13 |                                       |
| 1275. C731CO3 + C10H17O3O2 → C18H30O8     | 1E-13 |                                       |
| 1276. C824O2 + C10H17O3O2 → C18H30O7      | 1E-13 |                                       |
| 1277. C820O2 + C10H17O3O2 → C18H30O9      | 1E-13 |                                       |
| 1278. C825O2 + C10H17O3O2 → C18H30O8      | 1E-13 |                                       |
| 1279. C821O2 + C10H17O3O2 → C18H30O8      | 1E-13 |                                       |
| 1280. C732CO3 + C10H17O3O2 → C18H30O9     | 1E-13 |                                       |
| 1281. C8BCO2 + C10H17O3O2 → C18H30O5      | 1E-13 |                                       |
| 1282. C88O2 + C10H17O3O2 → C18H30O7       | 1E-13 |                                       |
| 1283. C718CO3 + C10H17O3O2 → C18H30O8     | 1E-13 |                                       |
| 1284. C87O2 + C10H17O3O2 → C18H30O8       | 1E-13 |                                       |
| 1285. C721CO3 + C10H17O3O2 → C18H30O8     | 1E-13 |                                       |
| 1286. NC826O2 + C10H17O3O2 → C18H31O7NO3  | 1E-13 |                                       |
|                                           |       |                                       |
| 1287. APINAO2 + C10H17O4O2 → C20H34O7     | 1E-13 |                                       |
| 1288. APINBO2 + C10H17O4O2 → C20H34O7     | 1E-13 |                                       |
| 1289. APINCO2 + C10H17O4O2 → C20H34O7     | 1E-13 |                                       |
| 1290. C107O2 + C10H17O4O2 → C20H34O8      | 1E-13 |                                       |
| 1291. C109O2 + C10H17O4O2 → C20H34O8      | 1E-13 |                                       |
| 1292. C106O2 + C10H17O4O2 → C20H34O9      | 1E-13 |                                       |
| 1293. C920CO3 + C10H17O4O2 → C20H34O9     | 1E-13 |                                       |
| 1294. C108O2 + C10H17O4O2 → C20H34O9      | 1E-13 |                                       |
| 1295. PINALO2 + C10H17O4O2 → C20H34O8     | 1E-13 |                                       |
| 1296. C96CO3 + C10H17O4O2 → C20H34O8      | 1E-13 |                                       |
| 1297. C923CO3 + C10H17O4O2 → C20H34O8     | 1E-13 |                                       |
| 1298. LIMAO2 + C10H17O4O2 → C20H34O7      | 1E-13 |                                       |
| 1299. LIMALBO2 + C10H17O4O2 → C20H34O8    | 1E-13 |                                       |
| 1300. LIMCO2 + C10H17O4O2 → C20H34O7      | 1E-13 |                                       |
| 1301. LIMALO2 + C10H17O4O2 → C20H34O8     | 1E-13 |                                       |
| 1302. LIMBO2 + C10H17O4O2 → C20H34O7      | 1E-13 |                                       |
| 1303. LIMALAO2 + C10H17O4O2 → C20H34O8    | 1E-13 |                                       |
| 1304. BPINAO2 + C10H17O4O2 → C20H34O7     | 1E-13 |                                       |
| 1305. BPINBO2 + C10H17O4O2 → C20H34O7     | 1E-13 |                                       |
| 1306. BPINCO2 + C10H17O4O2 → C20H34O7     | 1E-13 |                                       |
| 1307. C918CO3 + C10H17O4O2 → C20H34O8     | 1E-13 |                                       |
| 1308. NAPINAO2 + C10H17O4O2 → C20H35O6NO3 | 1E-13 | HOM dimers containing NO <sub>3</sub> |
| 1309. NAPINBO2 + C10H17O4O2 → C20H35O6NO3 | 1E-13 | HOM dimers containing NO <sub>3</sub> |
| 1310. NC102O2 + C10H17O4O2 → C20H35O7NO3  | 1E-13 | HOM dimers containing NO <sub>3</sub> |
| 1311. NC101O2 + C10H17O4O2 → C20H35O7NO3  | 1E-13 | HOM dimers containing NO <sub>3</sub> |
| 1312. NLIMO2 + C10H17O4O2 → C20H35O6NO3   | 1E-13 | HOM dimers containing NO <sub>3</sub> |
| 1313. NLIMALO2 + C10H17O4O2 → C20H35O7NO3 | 1E-13 | HOM dimers containing NO <sub>3</sub> |
| 1314. NC91CO3 + C10H17O4O2 → C20H35O7NO3  | 1E-13 | HOM dimers containing NO <sub>3</sub> |
| 1315. NBPINAO2 + C10H17O4O2 → C20H35O6NO3 | 1E-13 | HOM dimers containing NO <sub>3</sub> |
| 1316. NBPINBO2 + C10H17O4O2 → C20H35O6NO3 | 1E-13 | HOM dimers containing NO <sub>3</sub> |
|                                           |       |                                       |
| 1317. C96O2 + C10H17O4O2 → C19H32O7       | 1E-13 |                                       |
| 1318. C89CO3 + C10H17O4O2 → C19H32O8      | 1E-13 |                                       |
| 1319. C920O2 + C10H17O4O2 → C19H32O8      | 1E-13 |                                       |
| 1320. C97O2 + C10H17O4O2 → C19H32O8       | 1E-13 |                                       |
| 1321. C85CO3 + C10H17O4O2 → C19H32O8      | 1E-13 |                                       |
| 1322. C811CO3 + C10H17O4O2 → C19H32O9     | 1E-13 |                                       |
| 1323. C921O2 + C10H17O4O2 → C19H32O9      | 1E-13 |                                       |
| 1324. C98O2 + C10H17O4O2 → C19H32O9       | 1E-13 |                                       |
| 1325. C922O2+ C10H17O4O2 → C19H32O10      | 1E-13 |                                       |
| 1326. C923O2 + C10H17O4O2 → C19H32O7      | 1E-13 |                                       |
| 1327. C924O2 + C10H17O4O2 → C19H32O8      | 1E-13 |                                       |
| 1328. C816CO3 + C10H17O4O2 → C19H32O8     | 1E-13 |                                       |
| 1329. NORLIMO2 + C10H17O4O2 → C19H32O9    | 1E-13 |                                       |
| 1330. LMKAO2 + C10H17O4O2 → C19H32O8      | 1E-13 |                                       |
| 1331. LMKBO2 + C10H17O4O2 → C19H32O8      | 1E-13 |                                       |
| 1332. C926O2 + C10H17O4O2 → C19H32O9      | 1E-13 |                                       |
| 1333. C817CO3 + C10H17O4O2 → C19H32O9     | 1E-13 |                                       |
| 1334. LMLKAO2 + C10H17O4O2 → C19H32O9     | 1E-13 |                                       |
| 1335. LMLKBO2 + C10H17O4O2 → C19H32O9     | 1E-13 |                                       |
| 1336. C823CO3 + C10H17O4O2 → C19H32O9     | 1E-13 |                                       |
| 1337. C925O2 + C10H17O4O2 → C19H32O10     | 1E-13 |                                       |
| 1338. NOPINAO2+ C10H17O4O2 → C19H32O7     | 1E-13 |                                       |
| 1339. NOPINBO2+ C10H17O4O2 → C19H32O7     | 1E-13 |                                       |
| 1340. NOPINCO2+ C10H17O4O2 → C19H32O7     | 1E-13 |                                       |
| 1341. NOPINDO2+ C10H17O4O2 → C19H32O7     | 1E-13 |                                       |
| 1342. C918O2+ C10H17O4O2 → C19H32O8       | 1E-13 |                                       |



|                                           |       |                                       |
|-------------------------------------------|-------|---------------------------------------|
| 1343. C9DCO2+ C10H17O4O2 → C19H32O8       | 1E-13 |                                       |
| 1344. C9I5O2+ C10H17O4O2 → C19H32O8       | 1E-13 |                                       |
| 1345. C9I7O2+ C10H17O4O2 → C19H32O8       | 1E-13 |                                       |
| 1346. C9I9O2+ C10H17O4O2 → C19H32O9       | 1E-13 |                                       |
| 1347. C9I4O2+ C10H17O4O2 → C19H32O9       | 1E-13 |                                       |
| 1348. C9I6O2+ C10H17O4O2 → C19H32O9       | 1E-13 |                                       |
| 1349. C88CO3+ C10H17O4O2 → C19H32O9       | 1E-13 |                                       |
| 1350. C87CO3+ C10H17O4O2 → C19H32O10      | 1E-13 |                                       |
| 1351. C822CO3+ C10H17O4O2 → C19H32O8      | 1E-13 |                                       |
| 1352. NLMKAO2+ C10H17O4O2 → C19H33O7NO3   | 1E-13 |                                       |
|                                           |       |                                       |
| 1353. C85O2 + C10H17O4O2 → C18H30O7       | 1E-13 |                                       |
| 1354. C89O2 + C10H17O4O2 → C18H30O7       | 1E-13 |                                       |
| 1355. C86O2 + C10H17O4O2 → C18H30O8       | 1E-13 |                                       |
| 1356. C811O2 + C10H17O4O2 → C18H30O8      | 1E-13 |                                       |
| 1357. C810O2 + C10H17O4O2 → C18H30O8      | 1E-13 |                                       |
| 1358. C812O2 + C10H17O4O2 → C18H30O9      | 1E-13 |                                       |
| 1359. C813O2 + C10H17O4O2 → C18H30O7      | 1E-13 |                                       |
| 1360. C729CO3 + C10H17O4O2 → C18H30O8     | 1E-13 |                                       |
| 1361. C816O2 + C10H17O4O2 → C18H30O7      | 1E-13 |                                       |
| 1362. C817O2 + C10H17O4O2 → C18H30O8      | 1E-13 |                                       |
| 1363. C826O2 + C10H17O4O2 → C18H30O9      | 1E-13 |                                       |
| 1364. C822O2 + C10H17O4O2 → C18H30O7      | 1E-13 |                                       |
| 1365. C818O2 + C10H17O4O2 → C18H30O9      | 1E-13 |                                       |
| 1366. C823O2 + C10H17O4O2 → C18H30O8      | 1E-13 |                                       |
| 1367. C819O2 + C10H17O4O2 → C18H30O9      | 1E-13 |                                       |
| 1368. C727CO3 + C10H17O4O2 → C18H30O9     | 1E-13 |                                       |
| 1369. C731CO3 + C10H17O4O2 → C18H30O9     | 1E-13 |                                       |
| 1370. C824O2 + C10H17O4O2 → C18H30O8      | 1E-13 |                                       |
| 1371. C820O2 + C10H17O4O2 → C18H30O10     | 1E-13 |                                       |
| 1372. C825O2 + C10H17O4O2 → C18H30O9      | 1E-13 |                                       |
| 1373. C821O2 + C10H17O4O2 → C18H30O9      | 1E-13 |                                       |
| 1374. C732CO3 + C10H17O4O2 → C18H30O10    | 1E-13 |                                       |
| 1375. C8BCO2 + C10H17O4O2 → C18H30O6      | 1E-13 |                                       |
| 1376. C88O2 + C10H17O4O2 → C18H30O8       | 1E-13 |                                       |
| 1377. C718CO3 + C10H17O4O2 → C18H30O9     | 1E-13 |                                       |
| 1378. C87O2 + C10H17O4O2 → C18H30O9       | 1E-13 |                                       |
| 1379. C721CO3 + C10H17O4O2 → C18H30O9     | 1E-13 |                                       |
| 1380. NC826O2 + C10H17O4O2 → C18H31O8NO3  | 1E-13 |                                       |
|                                           |       |                                       |
| 1381. APINAO2 + C10H17O5O2 → C20H34O8     | 5E-13 |                                       |
| 1382. APINBO2 + C10H17O5O2 → C20H34O8     | 5E-13 |                                       |
| 1383. APINCO2 + C10H17O5O2 → C20H34O8     | 5E-13 |                                       |
| 1384. C107O2 + C10H17O5O2 → C20H34O9      | 5E-13 |                                       |
| 1385. C109O2 + C10H17O5O2 → C20H34O9      | 5E-13 |                                       |
| 1386. C106O2 + C10H17O5O2 → C20H34O10     | 5E-13 |                                       |
| 1387. C920CO3 + C10H17O5O2 → C20H34O10    | 5E-13 |                                       |
| 1388. C108O2 + C10H17O5O2 → C20H34O10     | 5E-13 |                                       |
| 1389. PINALO2 + C10H17O5O2 → C20H34O9     | 5E-13 |                                       |
| 1390. C96CO3 + C10H17O5O2 → C20H34O9      | 5E-13 |                                       |
| 1391. C923CO3 + C10H17O5O2 → C20H34O9     | 5E-13 |                                       |
| 1392. LIMAO2 + C10H17O5O2 → C20H34O8      | 5E-13 |                                       |
| 1393. LIMALBO2 + C10H17O5O2 → C20H34O9    | 5E-13 |                                       |
| 1394. LIMCO2 + C10H17O5O2 → C20H34O8      | 5E-13 |                                       |
| 1395. LIMALO2 + C10H17O5O2 → C20H34O9     | 5E-13 |                                       |
| 1396. LIMBO2 + C10H17O5O2 → C20H34O8      | 5E-13 |                                       |
| 1397. LIMALAO2 + C10H17O5O2 → C20H34O9    | 5E-13 |                                       |
| 1398. BPINAO2 + C10H17O5O2 → C20H34O8     | 5E-13 |                                       |
| 1399. BPINBO2 + C10H17O5O2 → C20H34O8     | 5E-13 |                                       |
| 1400. BPINCO2 + C10H17O5O2 → C20H34O8     | 5E-13 |                                       |
| 1401. C918CO3 + C10H17O5O2 → C20H34O9     | 5E-13 |                                       |
| 1402. NAPINAO2 + C10H17O5O2 → C20H35O7NO3 | 5E-13 | HOM dimers containing NO <sub>3</sub> |
| 1403. NAPINBO2 + C10H17O5O2 → C20H35O7NO3 | 5E-13 | HOM dimers containing NO <sub>3</sub> |
| 1404. NC102O2 + C10H17O5O2 → C20H35O8NO3  | 5E-13 | HOM dimers containing NO <sub>3</sub> |
| 1405. NC101O2 + C10H17O5O2 → C20H35O8NO3  | 5E-13 | HOM dimers containing NO <sub>3</sub> |
| 1406. NLIMO2 + C10H17O5O2 → C20H35O7NO3   | 5E-13 | HOM dimers containing NO <sub>3</sub> |
| 1407. NLIMALO2 + C10H17O5O2 → C20H35O8NO3 | 5E-13 | HOM dimers containing NO <sub>3</sub> |
| 1408. NC91CO3 + C10H17O5O2 → C20H35O8NO3  | 5E-13 | HOM dimers containing NO <sub>3</sub> |
| 1409. NBPINAO2 + C10H17O5O2 → C20H35O7NO3 | 5E-13 | HOM dimers containing NO <sub>3</sub> |
| 1410. NBPINBO2 + C10H17O5O2 → C20H35O7NO3 | 5E-13 | HOM dimers containing NO <sub>3</sub> |
|                                           |       |                                       |
| 1411. C96O2 + C10H17O5O2 → C19H32O8       | 5E-13 |                                       |
| 1412. C89CO3 + C10H17O5O2 → C19H32O9      | 5E-13 |                                       |
| 1413. C920O2 + C10H17O5O2 → C19H32O9      | 5E-13 |                                       |

|                                          |       |
|------------------------------------------|-------|
| 1414. C97O2 + C10H17O5O2 → C19H32O9      | 5E-13 |
| 1415. C85CO3 + C10H17O5O2 → C19H32O9     | 5E-13 |
| 1416. C811CO3 + C10H17O5O2 → C19H32O10   | 5E-13 |
| 1417. C921O2 + C10H17O5O2 → C19H32O10    | 5E-13 |
| 1418. C98O2 + C10H17O5O2 → C19H32O10     | 5E-13 |
| 1419. C922O2+ C10H17O5O2 → C19H32O11     | 5E-13 |
| 1420. C923O2 + C10H17O5O2 → C19H32O8     | 5E-13 |
| 1421. C924O2 + C10H17O5O2 → C19H32O9     | 5E-13 |
| 1422. C816CO3 + C10H17O5O2 → C19H32O9    | 5E-13 |
| 1423. NORLIMO2 + C10H17O5O2 → C19H32O10  | 5E-13 |
| 1424. LMKAO2 + C10H17O5O2 → C19H32O9     | 5E-13 |
| 1425. LMKBO2 + C10H17O5O2 → C19H32O9     | 5E-13 |
| 1426. C926O2 + C10H17O5O2 → C19H32O10    | 5E-13 |
| 1427. C817CO3 + C10H17O5O2 → C19H32O10   | 5E-13 |
| 1428. LMLKAO2 + C10H17O5O2 → C19H32O10   | 5E-13 |
| 1429. LMLKBO2 + C10H17O5O2 → C19H32O10   | 5E-13 |
| 1430. C823CO3 + C10H17O5O2 → C19H32O10   | 5E-13 |
| 1431. C925O2 + C10H17O5O2 → C19H32O11    | 5E-13 |
| 1432. NOPINAO2+ C10H17O5O2 → C19H32O8    | 5E-13 |
| 1433. NOPINBO2+ C10H17O5O2 → C19H32O8    | 5E-13 |
| 1434. NOPINCO2+ C10H17O5O2 → C19H32O8    | 5E-13 |
| 1435. NOPINDO2+ C10H17O5O2 → C19H32O8    | 5E-13 |
| 1436. C918O2+ C10H17O5O2 → C19H32O9      | 5E-13 |
| 1437. C9DCO2+ C10H17O5O2 → C19H32O9      | 5E-13 |
| 1438. C915O2+ C10H17O5O2 → C19H32O9      | 5E-13 |
| 1439. C917O2+ C10H17O5O2 → C19H32O9      | 5E-13 |
| 1440. C919O2+ C10H17O5O2 → C19H32O10     | 5E-13 |
| 1441. C914O2+ C10H17O5O2 → C19H32O10     | 5E-13 |
| 1442. C916O2+ C10H17O5O2 → C19H32O10     | 5E-13 |
| 1443. C88CO3+ C10H17O5O2 → C19H32O10     | 5E-13 |
| 1444. C87CO3+ C10H17O5O2 → C19H32O11     | 5E-13 |
| 1445. C822CO3+ C10H17O5O2 → C19H32O9     | 5E-13 |
| 1446. NLMKAO2+ C10H17O5O2 → C19H33O8NO3  | 5E-13 |
|                                          |       |
| 1447. C85O2 + C10H17O5O2 → C18H30O8      | 5E-13 |
| 1448. C89O2 + C10H17O5O2 → C18H30O8      | 5E-13 |
| 1449. C86O2 + C10H17O5O2 → C18H30O9      | 5E-13 |
| 1450. C811O2 + C10H17O5O2 → C18H30O9     | 5E-13 |
| 1451. C810O2 + C10H17O5O2 → C18H30O9     | 5E-13 |
| 1452. C812O2 + C10H17O5O2 → C18H30O10    | 5E-13 |
| 1453. C813O2 + C10H17O5O2 → C18H30O8     | 5E-13 |
| 1454. C729CO3 + C10H17O5O2 → C18H30O9    | 5E-13 |
| 1455. C816O2 + C10H17O5O2 → C18H30O8     | 5E-13 |
| 1456. C817O2 + C10H17O5O2 → C18H30O9     | 5E-13 |
| 1457. C826O2 + C10H17O5O2 → C18H30O10    | 5E-13 |
| 1458. C822O2 + C10H17O5O2 → C18H30O8     | 5E-13 |
| 1459. C818O2 + C10H17O5O2 → C18H30O10    | 5E-13 |
| 1460. C823O2 + C10H17O5O2 → C18H30O9     | 5E-13 |
| 1461. C819O2 + C10H17O5O2 → C18H30O10    | 5E-13 |
| 1462. C727CO3 + C10H17O5O2 → C18H30O10   | 5E-13 |
| 1463. C731CO3 + C10H17O5O2 → C18H30O10   | 5E-13 |
| 1464. C824O2 + C10H17O5O2 → C18H30O9     | 5E-13 |
| 1465. C820O2 + C10H17O5O2 → C18H30O11    | 5E-13 |
| 1466. C825O2 + C10H17O5O2 → C18H30O10    | 5E-13 |
| 1467. C821O2 + C10H17O5O2 → C18H30O10    | 5E-13 |
| 1468. C732CO3 + C10H17O5O2 → C18H30O11   | 5E-13 |
| 1469. C8BCO2 + C10H17O5O2 → C18H30O7     | 5E-13 |
| 1470. C88O2 + C10H17O5O2 → C18H30O9      | 5E-13 |
| 1471. C718CO3 + C10H17O5O2 → C18H30O10   | 5E-13 |
| 1472. C87O2 + C10H17O5O2 → C18H30O10     | 5E-13 |
| 1473. C721CO3 + C10H17O5O2 → C18H30O10   | 5E-13 |
| 1474. NC826O2 + C10H17O5O2 → C18H31O9NO3 | 5E-13 |
|                                          |       |
| 1475. APINAO2 + C10H17O6O2 → C20H34O9    | 2E-12 |
| 1476. APINBO2 + C10H17O6O2 → C20H34O9    | 2E-12 |
| 1477. APINCO2 + C10H17O6O2 → C20H34O9    | 2E-12 |
| 1478. C107O2 + C10H17O6O2 → C20H34O10    | 2E-12 |
| 1479. C109O2 + C10H17O6O2 → C20H34O10    | 2E-12 |
| 1480. C106O2 + C10H17O6O2 → C20H34O11    | 2E-12 |
| 1481. C920CO3 + C10H17O6O2 → C20H34O11   | 2E-12 |
| 1482. C108O2 + C10H17O6O2 → C20H34O11    | 2E-12 |
| 1483. PINALO2 + C10H17O6O2 → C20H34O10   | 2E-12 |
| 1484. C96CO3 + C10H17O6O2 → C20H34O10    | 2E-12 |
| 1485. C923CO3 + C10H17O6O2 → C20H34O10   | 2E-12 |

|                                                                                                                                                                         |       |                                       |
|-------------------------------------------------------------------------------------------------------------------------------------------------------------------------|-------|---------------------------------------|
| 1486. LMAO <sub>2</sub> + C <sub>10</sub> H <sub>17</sub> O <sub>6</sub> O <sub>2</sub> → C <sub>20</sub> H <sub>34</sub> O <sub>9</sub>                                | 2E-12 |                                       |
| 1487. LIMALBO <sub>2</sub> + C <sub>10</sub> H <sub>17</sub> O <sub>6</sub> O <sub>2</sub> → C <sub>20</sub> H <sub>34</sub> O <sub>10</sub>                            | 2E-12 |                                       |
| 1488. LIMCO <sub>2</sub> + C <sub>10</sub> H <sub>17</sub> O <sub>6</sub> O <sub>2</sub> → C <sub>20</sub> H <sub>34</sub> O <sub>9</sub>                               | 2E-12 |                                       |
| 1489. LIMALO <sub>2</sub> + C <sub>10</sub> H <sub>17</sub> O <sub>6</sub> O <sub>2</sub> → C <sub>20</sub> H <sub>34</sub> O <sub>10</sub>                             | 2E-12 |                                       |
| 1490. LIMBO <sub>2</sub> + C <sub>10</sub> H <sub>17</sub> O <sub>6</sub> O <sub>2</sub> → C <sub>20</sub> H <sub>34</sub> O <sub>9</sub>                               | 2E-12 |                                       |
| 1491. LIMALAO <sub>2</sub> + C <sub>10</sub> H <sub>17</sub> O <sub>6</sub> O <sub>2</sub> → C <sub>20</sub> H <sub>34</sub> O <sub>10</sub>                            | 2E-12 |                                       |
| 1492. BPINAO <sub>2</sub> + C <sub>10</sub> H <sub>17</sub> O <sub>6</sub> O <sub>2</sub> → C <sub>20</sub> H <sub>34</sub> O <sub>9</sub>                              | 2E-12 |                                       |
| 1493. BPINBO <sub>2</sub> + C <sub>10</sub> H <sub>17</sub> O <sub>6</sub> O <sub>2</sub> → C <sub>20</sub> H <sub>34</sub> O <sub>9</sub>                              | 2E-12 |                                       |
| 1494. BPINCO <sub>2</sub> + C <sub>10</sub> H <sub>17</sub> O <sub>6</sub> O <sub>2</sub> → C <sub>20</sub> H <sub>34</sub> O <sub>9</sub>                              | 2E-12 |                                       |
| 1495. C <sub>9</sub> I <sub>8</sub> CO <sub>3</sub> + C <sub>10</sub> H <sub>17</sub> O <sub>6</sub> O <sub>2</sub> → C <sub>20</sub> H <sub>34</sub> O <sub>10</sub>   | 2E-12 |                                       |
| 1496. NAPINAO <sub>2</sub> + C <sub>10</sub> H <sub>17</sub> O <sub>6</sub> O <sub>2</sub> → C <sub>20</sub> H <sub>35</sub> O <sub>8</sub> NO <sub>3</sub>             | 2E-12 | HOM dimers containing NO <sub>3</sub> |
| 1497. NAPINBO <sub>2</sub> + C <sub>10</sub> H <sub>17</sub> O <sub>6</sub> O <sub>2</sub> → C <sub>20</sub> H <sub>35</sub> O <sub>8</sub> NO <sub>3</sub>             | 2E-12 | HOM dimers containing NO <sub>3</sub> |
| 1498. NC <sub>10</sub> 2O <sub>2</sub> + C <sub>10</sub> H <sub>17</sub> O <sub>6</sub> O <sub>2</sub> → C <sub>20</sub> H <sub>35</sub> O <sub>9</sub> NO <sub>3</sub> | 2E-12 | HOM dimers containing NO <sub>3</sub> |
| 1499. NC <sub>10</sub> 1O <sub>2</sub> + C <sub>10</sub> H <sub>17</sub> O <sub>6</sub> O <sub>2</sub> → C <sub>20</sub> H <sub>35</sub> O <sub>9</sub> NO <sub>3</sub> | 2E-12 | HOM dimers containing NO <sub>3</sub> |
| 1500. NLIMO <sub>2</sub> + C <sub>10</sub> H <sub>17</sub> O <sub>6</sub> O <sub>2</sub> → C <sub>20</sub> H <sub>35</sub> O <sub>8</sub> NO <sub>3</sub>               | 2E-12 | HOM dimers containing NO <sub>3</sub> |
| 1501. NLIMALO <sub>2</sub> + C <sub>10</sub> H <sub>17</sub> O <sub>6</sub> O <sub>2</sub> → C <sub>20</sub> H <sub>35</sub> O <sub>9</sub> NO <sub>3</sub>             | 2E-12 | HOM dimers containing NO <sub>3</sub> |
| 1502. NC <sub>9</sub> 1CO <sub>3</sub> + C <sub>10</sub> H <sub>17</sub> O <sub>6</sub> O <sub>2</sub> → C <sub>20</sub> H <sub>35</sub> O <sub>9</sub> NO <sub>3</sub> | 2E-12 | HOM dimers containing NO <sub>3</sub> |
| 1503. NBPINAO <sub>2</sub> + C <sub>10</sub> H <sub>17</sub> O <sub>6</sub> O <sub>2</sub> → C <sub>20</sub> H <sub>35</sub> O <sub>8</sub> NO <sub>3</sub>             | 2E-12 | HOM dimers containing NO <sub>3</sub> |
| 1504. NBPINBO <sub>2</sub> + C <sub>10</sub> H <sub>17</sub> O <sub>6</sub> O <sub>2</sub> → C <sub>20</sub> H <sub>35</sub> O <sub>8</sub> NO <sub>3</sub>             | 2E-12 | HOM dimers containing NO <sub>3</sub> |
|                                                                                                                                                                         |       |                                       |
| 1505. C <sub>9</sub> 6O <sub>2</sub> + C <sub>10</sub> H <sub>17</sub> O <sub>6</sub> O <sub>2</sub> → C <sub>19</sub> H <sub>32</sub> O <sub>9</sub>                   | 2E-12 |                                       |
| 1506. C <sub>8</sub> 9CO <sub>3</sub> + C <sub>10</sub> H <sub>17</sub> O <sub>6</sub> O <sub>2</sub> → C <sub>19</sub> H <sub>32</sub> O <sub>10</sub>                 | 2E-12 |                                       |
| 1507. C <sub>9</sub> 20O <sub>2</sub> + C <sub>10</sub> H <sub>17</sub> O <sub>6</sub> O <sub>2</sub> → C <sub>19</sub> H <sub>32</sub> O <sub>10</sub>                 | 2E-12 |                                       |
| 1508. C <sub>9</sub> 7O <sub>2</sub> + C <sub>10</sub> H <sub>17</sub> O <sub>6</sub> O <sub>2</sub> → C <sub>19</sub> H <sub>32</sub> O <sub>10</sub>                  | 2E-12 |                                       |
| 1509. C <sub>8</sub> 5CO <sub>3</sub> + C <sub>10</sub> H <sub>17</sub> O <sub>6</sub> O <sub>2</sub> → C <sub>19</sub> H <sub>32</sub> O <sub>10</sub>                 | 2E-12 |                                       |
| 1510. C <sub>8</sub> 11CO <sub>3</sub> + C <sub>10</sub> H <sub>17</sub> O <sub>6</sub> O <sub>2</sub> → C <sub>19</sub> H <sub>32</sub> O <sub>11</sub>                | 2E-12 |                                       |
| 1511. C <sub>9</sub> 21O <sub>2</sub> + C <sub>10</sub> H <sub>17</sub> O <sub>6</sub> O <sub>2</sub> → C <sub>19</sub> H <sub>32</sub> O <sub>11</sub>                 | 2E-12 |                                       |
| 1512. C <sub>9</sub> 8O <sub>2</sub> + C <sub>10</sub> H <sub>17</sub> O <sub>6</sub> O <sub>2</sub> → C <sub>19</sub> H <sub>32</sub> O <sub>11</sub>                  | 2E-12 |                                       |
| 1513. C <sub>9</sub> 22O <sub>2</sub> + C <sub>10</sub> H <sub>17</sub> O <sub>6</sub> O <sub>2</sub> → C <sub>19</sub> H <sub>32</sub> O <sub>12</sub>                 | 2E-12 |                                       |
| 1514. C <sub>9</sub> 23O <sub>2</sub> + C <sub>10</sub> H <sub>17</sub> O <sub>6</sub> O <sub>2</sub> → C <sub>19</sub> H <sub>32</sub> O <sub>9</sub>                  | 2E-12 |                                       |
| 1515. C <sub>9</sub> 24O <sub>2</sub> + C <sub>10</sub> H <sub>17</sub> O <sub>6</sub> O <sub>2</sub> → C <sub>19</sub> H <sub>32</sub> O <sub>10</sub>                 | 2E-12 |                                       |
| 1516. C <sub>8</sub> 16CO <sub>3</sub> + C <sub>10</sub> H <sub>17</sub> O <sub>6</sub> O <sub>2</sub> → C <sub>19</sub> H <sub>32</sub> O <sub>10</sub>                | 2E-12 |                                       |
| 1517. NORLIMO <sub>2</sub> + C <sub>10</sub> H <sub>17</sub> O <sub>6</sub> O <sub>2</sub> → C <sub>19</sub> H <sub>32</sub> O <sub>11</sub>                            | 2E-12 |                                       |
| 1518. LMKAO <sub>2</sub> + C <sub>10</sub> H <sub>17</sub> O <sub>6</sub> O <sub>2</sub> → C <sub>19</sub> H <sub>32</sub> O <sub>10</sub>                              | 2E-12 |                                       |
| 1519. LMKBO <sub>2</sub> + C <sub>10</sub> H <sub>17</sub> O <sub>6</sub> O <sub>2</sub> → C <sub>19</sub> H <sub>32</sub> O <sub>10</sub>                              | 2E-12 |                                       |
| 1520. C <sub>9</sub> 26O <sub>2</sub> + C <sub>10</sub> H <sub>17</sub> O <sub>6</sub> O <sub>2</sub> → C <sub>19</sub> H <sub>32</sub> O <sub>11</sub>                 | 2E-12 |                                       |
| 1521. C <sub>8</sub> 17CO <sub>3</sub> + C <sub>10</sub> H <sub>17</sub> O <sub>6</sub> O <sub>2</sub> → C <sub>19</sub> H <sub>32</sub> O <sub>11</sub>                | 2E-12 |                                       |
| 1522. LMLKAO <sub>2</sub> + C <sub>10</sub> H <sub>17</sub> O <sub>6</sub> O <sub>2</sub> → C <sub>19</sub> H <sub>32</sub> O <sub>11</sub>                             | 2E-12 |                                       |
| 1523. LMLKBO <sub>2</sub> + C <sub>10</sub> H <sub>17</sub> O <sub>6</sub> O <sub>2</sub> → C <sub>19</sub> H <sub>32</sub> O <sub>11</sub>                             | 2E-12 |                                       |
| 1524. C <sub>8</sub> 23CO <sub>3</sub> + C <sub>10</sub> H <sub>17</sub> O <sub>6</sub> O <sub>2</sub> → C <sub>19</sub> H <sub>32</sub> O <sub>11</sub>                | 2E-12 |                                       |
| 1525. C <sub>9</sub> 25O <sub>2</sub> + C <sub>10</sub> H <sub>17</sub> O <sub>6</sub> O <sub>2</sub> → C <sub>19</sub> H <sub>32</sub> O <sub>12</sub>                 | 2E-12 |                                       |
| 1526. NOPINAO <sub>2</sub> + C <sub>10</sub> H <sub>17</sub> O <sub>6</sub> O <sub>2</sub> → C <sub>19</sub> H <sub>32</sub> O <sub>9</sub>                             | 2E-12 |                                       |
| 1527. NOPINBO <sub>2</sub> + C <sub>10</sub> H <sub>17</sub> O <sub>6</sub> O <sub>2</sub> → C <sub>19</sub> H <sub>32</sub> O <sub>9</sub>                             | 2E-12 |                                       |
| 1528. NOPINCO <sub>2</sub> + C <sub>10</sub> H <sub>17</sub> O <sub>6</sub> O <sub>2</sub> → C <sub>19</sub> H <sub>32</sub> O <sub>9</sub>                             | 2E-12 |                                       |
| 1529. NOPINDO <sub>2</sub> + C <sub>10</sub> H <sub>17</sub> O <sub>6</sub> O <sub>2</sub> → C <sub>19</sub> H <sub>32</sub> O <sub>9</sub>                             | 2E-12 |                                       |
| 1530. C <sub>9</sub> 18O <sub>2</sub> + C <sub>10</sub> H <sub>17</sub> O <sub>6</sub> O <sub>2</sub> → C <sub>19</sub> H <sub>32</sub> O <sub>10</sub>                 | 2E-12 |                                       |
| 1531. C <sub>9</sub> DCO <sub>2</sub> + C <sub>10</sub> H <sub>17</sub> O <sub>6</sub> O <sub>2</sub> → C <sub>19</sub> H <sub>32</sub> O <sub>10</sub>                 | 2E-12 |                                       |
| 1532. C <sub>9</sub> 15O <sub>2</sub> + C <sub>10</sub> H <sub>17</sub> O <sub>6</sub> O <sub>2</sub> → C <sub>19</sub> H <sub>32</sub> O <sub>10</sub>                 | 2E-12 |                                       |
| 1533. C <sub>9</sub> 17O <sub>2</sub> + C <sub>10</sub> H <sub>17</sub> O <sub>6</sub> O <sub>2</sub> → C <sub>19</sub> H <sub>32</sub> O <sub>10</sub>                 | 2E-12 |                                       |
| 1534. C <sub>9</sub> 19O <sub>2</sub> + C <sub>10</sub> H <sub>17</sub> O <sub>6</sub> O <sub>2</sub> → C <sub>19</sub> H <sub>32</sub> O <sub>11</sub>                 | 2E-12 |                                       |
| 1535. C <sub>9</sub> 14O <sub>2</sub> + C <sub>10</sub> H <sub>17</sub> O <sub>6</sub> O <sub>2</sub> → C <sub>19</sub> H <sub>32</sub> O <sub>11</sub>                 | 2E-12 |                                       |
| 1536. C <sub>9</sub> 16O <sub>2</sub> + C <sub>10</sub> H <sub>17</sub> O <sub>6</sub> O <sub>2</sub> → C <sub>19</sub> H <sub>32</sub> O <sub>11</sub>                 | 2E-12 |                                       |
| 1537. C <sub>8</sub> 8CO <sub>3</sub> + C <sub>10</sub> H <sub>17</sub> O <sub>6</sub> O <sub>2</sub> → C <sub>19</sub> H <sub>32</sub> O <sub>11</sub>                 | 2E-12 |                                       |
| 1538. C <sub>8</sub> 7CO <sub>3</sub> + C <sub>10</sub> H <sub>17</sub> O <sub>6</sub> O <sub>2</sub> → C <sub>19</sub> H <sub>32</sub> O <sub>12</sub>                 | 2E-12 |                                       |
| 1539. C <sub>8</sub> 22CO <sub>3</sub> + C <sub>10</sub> H <sub>17</sub> O <sub>6</sub> O <sub>2</sub> → C <sub>19</sub> H <sub>32</sub> O <sub>10</sub>                | 2E-12 |                                       |
| 1540. NLMKAO <sub>2</sub> + C <sub>10</sub> H <sub>17</sub> O <sub>6</sub> O <sub>2</sub> → C <sub>19</sub> H <sub>33</sub> O <sub>9</sub> NO <sub>3</sub>              | 2E-12 |                                       |
|                                                                                                                                                                         |       |                                       |
| 1541. C <sub>8</sub> 5O <sub>2</sub> + C <sub>10</sub> H <sub>17</sub> O <sub>6</sub> O <sub>2</sub> → C <sub>18</sub> H <sub>30</sub> O <sub>9</sub>                   | 2E-12 |                                       |
| 1542. C <sub>8</sub> 9O <sub>2</sub> + C <sub>10</sub> H <sub>17</sub> O <sub>6</sub> O <sub>2</sub> → C <sub>18</sub> H <sub>30</sub> O <sub>9</sub>                   | 2E-12 |                                       |
| 1543. C <sub>8</sub> 6O <sub>2</sub> + C <sub>10</sub> H <sub>17</sub> O <sub>6</sub> O <sub>2</sub> → C <sub>18</sub> H <sub>30</sub> O <sub>10</sub>                  | 2E-12 |                                       |
| 1544. C <sub>8</sub> 11O <sub>2</sub> + C <sub>10</sub> H <sub>17</sub> O <sub>6</sub> O <sub>2</sub> → C <sub>18</sub> H <sub>30</sub> O <sub>10</sub>                 | 2E-12 |                                       |
| 1545. C <sub>8</sub> 10O <sub>2</sub> + C <sub>10</sub> H <sub>17</sub> O <sub>6</sub> O <sub>2</sub> → C <sub>18</sub> H <sub>30</sub> O <sub>10</sub>                 | 2E-12 |                                       |
| 1546. C <sub>8</sub> 12O <sub>2</sub> + C <sub>10</sub> H <sub>17</sub> O <sub>6</sub> O <sub>2</sub> → C <sub>18</sub> H <sub>30</sub> O <sub>11</sub>                 | 2E-12 |                                       |
| 1547. C <sub>8</sub> 13O <sub>2</sub> + C <sub>10</sub> H <sub>17</sub> O <sub>6</sub> O <sub>2</sub> → C <sub>18</sub> H <sub>30</sub> O <sub>9</sub>                  | 2E-12 |                                       |
| 1548. C <sub>7</sub> 29CO <sub>3</sub> + C <sub>10</sub> H <sub>17</sub> O <sub>6</sub> O <sub>2</sub> → C <sub>18</sub> H <sub>30</sub> O <sub>10</sub>                | 2E-12 |                                       |
| 1549. C <sub>8</sub> 16O <sub>2</sub> + C <sub>10</sub> H <sub>17</sub> O <sub>6</sub> O <sub>2</sub> → C <sub>18</sub> H <sub>30</sub> O <sub>9</sub>                  | 2E-12 |                                       |
| 1550. C <sub>8</sub> 17O <sub>2</sub> + C <sub>10</sub> H <sub>17</sub> O <sub>6</sub> O <sub>2</sub> → C <sub>18</sub> H <sub>30</sub> O <sub>10</sub>                 | 2E-12 |                                       |
| 1551. C <sub>8</sub> 26O <sub>2</sub> + C <sub>10</sub> H <sub>17</sub> O <sub>6</sub> O <sub>2</sub> → C <sub>18</sub> H <sub>30</sub> O <sub>11</sub>                 | 2E-12 |                                       |
| 1552. C <sub>8</sub> 22O <sub>2</sub> + C <sub>10</sub> H <sub>17</sub> O <sub>6</sub> O <sub>2</sub> → C <sub>18</sub> H <sub>30</sub> O <sub>9</sub>                  | 2E-12 |                                       |
| 1553. C <sub>8</sub> 18O <sub>2</sub> + C <sub>10</sub> H <sub>17</sub> O <sub>6</sub> O <sub>2</sub> → C <sub>18</sub> H <sub>30</sub> O <sub>11</sub>                 | 2E-12 |                                       |
| 1554. C <sub>8</sub> 23O <sub>2</sub> + C <sub>10</sub> H <sub>17</sub> O <sub>6</sub> O <sub>2</sub> → C <sub>18</sub> H <sub>30</sub> O <sub>10</sub>                 | 2E-12 |                                       |
| 1555. C <sub>8</sub> 19O <sub>2</sub> + C <sub>10</sub> H <sub>17</sub> O <sub>6</sub> O <sub>2</sub> → C <sub>18</sub> H <sub>30</sub> O <sub>11</sub>                 | 2E-12 |                                       |
| 1556. C <sub>7</sub> 27CO <sub>3</sub> + C <sub>10</sub> H <sub>17</sub> O <sub>6</sub> O <sub>2</sub> → C <sub>18</sub> H <sub>30</sub> O <sub>11</sub>                | 2E-12 |                                       |
| 1557. C <sub>7</sub> 31CO <sub>3</sub> + C <sub>10</sub> H <sub>17</sub> O <sub>6</sub> O <sub>2</sub> → C <sub>18</sub> H <sub>30</sub> O <sub>11</sub>                | 2E-12 |                                       |

|                                            |       |                                       |
|--------------------------------------------|-------|---------------------------------------|
| 1558. C824O2 + C10H17O6O2 → C18H30O10      | 2E-12 |                                       |
| 1559. C820O2 + C10H17O6O2 → C18H30O12      | 2E-12 |                                       |
| 1560. C825O2 + C10H17O6O2 → C18H30O11      | 2E-12 |                                       |
| 1561. C821O2 + C10H17O6O2 → C18H30O11      | 2E-12 |                                       |
| 1562. C732CO3 + C10H17O6O2 → C18H30O12     | 2E-12 |                                       |
| 1563. C8BCO2 + C10H17O6O2 → C18H30O8       | 2E-12 |                                       |
| 1564. C88O2 + C10H17O6O2 → C18H30O10       | 2E-12 |                                       |
| 1565. C718CO3 + C10H17O6O2 → C18H30O11     | 2E-12 |                                       |
| 1566. C87O2 + C10H17O6O2 → C18H30O11       | 2E-12 |                                       |
| 1567. C721CO3 + C10H17O6O2 → C18H30O11     | 2E-12 |                                       |
| 1568. NC826O2 + C10H17O6O2 → C18H31O10NO3  | 2E-12 |                                       |
|                                            |       |                                       |
| 1569. APINAO2 + C10H17O7O2 → C20H34O10     | 3E-12 |                                       |
| 1570. APINBO2 + C10H17O7O2 → C20H34O10     | 3E-12 |                                       |
| 1571. APINCO2 + C10H17O7O2 → C20H34O10     | 3E-12 |                                       |
| 1572. C107O2 + C10H17O7O2 → C20H34O11      | 3E-12 |                                       |
| 1573. C109O2 + C10H17O7O2 → C20H34O11      | 3E-12 |                                       |
| 1574. C106O2 + C10H17O7O2 → C20H34O12      | 3E-12 |                                       |
| 1575. C920CO3 + C10H17O7O2 → C20H34O12     | 3E-12 |                                       |
| 1576. C108O2 + C10H17O7O2 → C20H34O12      | 3E-12 |                                       |
| 1577. PINALO2 + C10H17O7O2 → C20H34O11     | 3E-12 |                                       |
| 1578. C96CO3 + C10H17O7O2 → C20H34O11      | 3E-12 |                                       |
| 1579. C923CO3 + C10H17O7O2 → C20H34O11     | 3E-12 |                                       |
| 1580. LIMAO2 + C10H17O7O2 → C20H34O10      | 3E-12 |                                       |
| 1581. LIMALBO2 + C10H17O7O2 → C20H34O11    | 3E-12 |                                       |
| 1582. LIMCO2 + C10H17O7O2 → C20H34O10      | 3E-12 |                                       |
| 1583. LIMALO2 + C10H17O7O2 → C20H34O11     | 3E-12 |                                       |
| 1584. LIMBO2 + C10H17O7O2 → C20H34O10      | 3E-12 |                                       |
| 1585. LIMALAO2 + C10H17O7O2 → C20H34O11    | 3E-12 |                                       |
| 1586. BPINAO2 + C10H17O7O2 → C20H34O10     | 3E-12 |                                       |
| 1587. BPINBO2 + C10H17O7O2 → C20H34O10     | 3E-12 |                                       |
| 1588. BPINCO2 + C10H17O7O2 → C20H34O10     | 3E-12 |                                       |
| 1589. C918CO3 + C10H17O7O2 → C20H34O11     | 3E-12 |                                       |
| 1590. NAPINAO2 + C10H17O7O2 → C20H35O9NO3  | 3E-12 | HOM dimers containing NO <sub>3</sub> |
| 1591. NAPINBO2 + C10H17O7O2 → C20H35O9NO3  | 3E-12 | HOM dimers containing NO <sub>3</sub> |
| 1592. NC102O2 + C10H17O7O2 → C20H35O10NO3  | 3E-12 | HOM dimers containing NO <sub>3</sub> |
| 1593. NC101O2 + C10H17O7O2 → C20H35O10NO3  | 3E-12 | HOM dimers containing NO <sub>3</sub> |
| 1594. NLIMO2 + C10H17O7O2 → C20H35O9NO3    | 3E-12 | HOM dimers containing NO <sub>3</sub> |
| 1595. NLIMALO2 + C10H17O7O2 → C20H35O10NO3 | 3E-12 | HOM dimers containing NO <sub>3</sub> |
| 1596. NC91CO3 + C10H17O7O2 → C20H35O10NO3  | 3E-12 | HOM dimers containing NO <sub>3</sub> |
| 1597. NBPINAO2 + C10H17O7O2 → C20H35O9NO3  | 3E-12 | HOM dimers containing NO <sub>3</sub> |
| 1598. NBPINBO2 + C10H17O7O2 → C20H35O9NO3  | 3E-12 | HOM dimers containing NO <sub>3</sub> |
|                                            |       |                                       |
| 1599. C96O2 + C10H17O7O2 → C19H32O10       | 3E-12 |                                       |
| 1600. C89CO3 + C10H17O7O2 → C19H32O11      | 3E-12 |                                       |
| 1601. C920O2 + C10H17O7O2 → C19H32O11      | 3E-12 |                                       |
| 1602. C97O2 + C10H17O7O2 → C19H32O11       | 3E-12 |                                       |
| 1603. C85CO3 + C10H17O7O2 → C19H32O11      | 3E-12 |                                       |
| 1604. C811CO3 + C10H17O7O2 → C19H32O12     | 3E-12 |                                       |
| 1605. C921O2 + C10H17O7O2 → C19H32O12      | 3E-12 |                                       |
| 1606. C98O2 + C10H17O7O2 → C19H32O12       | 3E-12 |                                       |
| 1607. C922O2+ C10H17O7O2 → C19H32O13       | 3E-12 |                                       |
| 1608. C923O2 + C10H17O7O2 → C19H32O10      | 3E-12 |                                       |
| 1609. C924O2 + C10H17O7O2 → C19H32O11      | 3E-12 |                                       |
| 1610. C816CO3 + C10H17O7O2 → C19H32O11     | 3E-12 |                                       |
| 1611. NORLIMO2 + C10H17O7O2 → C19H32O12    | 3E-12 |                                       |
| 1612. LMKAO2 + C10H17O7O2 → C19H32O11      | 3E-12 |                                       |
| 1613. LMKBO2 + C10H17O7O2 → C19H32O11      | 3E-12 |                                       |
| 1614. C926O2 + C10H17O7O2 → C19H32O12      | 3E-12 |                                       |
| 1615. C817CO3 + C10H17O7O2 → C19H32O12     | 3E-12 |                                       |
| 1616. LMLKAO2 + C10H17O7O2 → C19H32O12     | 3E-12 |                                       |
| 1617. LMLKBO2 + C10H17O7O2 → C19H32O12     | 3E-12 |                                       |
| 1618. C823CO3 + C10H17O7O2 → C19H32O12     | 3E-12 |                                       |
| 1619. C925O2 + C10H17O7O2 → C19H32O13      | 3E-12 |                                       |
| 1620. NOPINAO2+ C10H17O7O2 → C19H32O10     | 3E-12 |                                       |
| 1621. NOPINBO2+ C10H17O7O2 → C19H32O10     | 3E-12 |                                       |
| 1622. NOPINCO2+ C10H17O7O2 → C19H32O10     | 3E-12 |                                       |
| 1623. NOPINDO2+ C10H17O7O2 → C19H32O10     | 3E-12 |                                       |
| 1624. C918O2+ C10H17O7O2 → C19H32O11       | 3E-12 |                                       |
| 1625. C9DCO2+ C10H17O7O2 → C19H32O11       | 3E-12 |                                       |
| 1626. C915O2+ C10H17O7O2 → C19H32O11       | 3E-12 |                                       |
| 1627. C917O2+ C10H17O7O2 → C19H32O11       | 3E-12 |                                       |
| 1628. C919O2+ C10H17O7O2 → C19H32O12       | 3E-12 |                                       |
| 1629. C914O2+ C10H17O7O2 → C19H32O12       | 3E-12 |                                       |

|                                            |       |                                       |
|--------------------------------------------|-------|---------------------------------------|
| 1630. C916O2+ C10H17O7O2 → C19H32O12       | 3E-12 |                                       |
| 1631. C88CO3+ C10H17O7O2 → C19H32O12       | 3E-12 |                                       |
| 1632. C87CO3+ C10H17O7O2 → C19H32O13       | 3E-12 |                                       |
| 1633. C822CO3+ C10H17O7O2 → C19H32O11      | 3E-12 |                                       |
| 1634. NLMKAO2+ C10H17O7O2 → C19H33O10NO3   | 3E-12 |                                       |
| 1635. C85O2 + C10H17O7O2 → C18H30O10       | 3E-12 |                                       |
| 1636. C89O2 + C10H17O7O2 → C18H30O10       | 3E-12 |                                       |
| 1637. C86O2 + C10H17O7O2 → C18H30O11       | 3E-12 |                                       |
| 1638. C811O2 + C10H17O7O2 → C18H30O11      | 3E-12 |                                       |
| 1639. C810O2 + C10H17O7O2 → C18H30O11      | 3E-12 |                                       |
| 1640. C812O2 + C10H17O7O2 → C18H30O12      | 3E-12 |                                       |
| 1641. C813O2 + C10H17O7O2 → C18H30O10      | 3E-12 |                                       |
| 1642. C729CO3 + C10H17O7O2 → C18H30O11     | 3E-12 |                                       |
| 1643. C816O2 + C10H17O7O2 → C18H30O10      | 3E-12 |                                       |
| 1644. C817O2 + C10H17O7O2 → C18H30O11      | 3E-12 |                                       |
| 1645. C826O2 + C10H17O7O2 → C18H30O12      | 3E-12 |                                       |
| 1646. C822O2 + C10H17O7O2 → C18H30O10      | 3E-12 |                                       |
| 1647. C818O2 + C10H17O7O2 → C18H30O12      | 3E-12 |                                       |
| 1648. C823O2 + C10H17O7O2 → C18H30O11      | 3E-12 |                                       |
| 1649. C819O2 + C10H17O7O2 → C18H30O12      | 3E-12 |                                       |
| 1650. C727CO3 + C10H17O7O2 → C18H30O12     | 3E-12 |                                       |
| 1651. C731CO3 + C10H17O7O2 → C18H30O12     | 3E-12 |                                       |
| 1652. C824O2 + C10H17O7O2 → C18H30O11      | 3E-12 |                                       |
| 1653. C820O2 + C10H17O7O2 → C18H30O13      | 3E-12 |                                       |
| 1654. C825O2 + C10H17O7O2 → C18H30O12      | 3E-12 |                                       |
| 1655. C821O2 + C10H17O7O2 → C18H30O12      | 3E-12 |                                       |
| 1656. C732CO3 + C10H17O7O2 → C18H30O13     | 3E-12 |                                       |
| 1657. C8BCO2 + C10H17O7O2 → C18H30O9       | 3E-12 |                                       |
| 1658. C88O2 + C10H17O7O2 → C18H30O11       | 3E-12 |                                       |
| 1659. C718CO3 + C10H17O7O2 → C18H30O12     | 3E-12 |                                       |
| 1660. C87O2 + C10H17O7O2 → C18H30O12       | 3E-12 |                                       |
| 1661. C721CO3 + C10H17O7O2 → C18H30O12     | 3E-12 |                                       |
| 1662. NC826O2 + C10H17O7O2 → C18H31O11NO3  | 3E-12 |                                       |
|                                            |       |                                       |
| 1663. APINAO2 + C10H17O8O2 → C20H34O11     | 3E-12 |                                       |
| 1664. APINBO2 + C10H17O8O2 → C20H34O11     | 3E-12 |                                       |
| 1665. APINCO2 + C10H17O8O2 → C20H34O11     | 3E-12 |                                       |
| 1666. C107O2 + C10H17O8O2 → C20H34O12      | 3E-12 |                                       |
| 1667. C109O2 + C10H17O8O2 → C20H34O12      | 3E-12 |                                       |
| 1668. C106O2 + C10H17O8O2 → C20H34O13      | 3E-12 |                                       |
| 1669. C920CO3 + C10H17O8O2 → C20H34O13     | 3E-12 |                                       |
| 1670. C108O2 + C10H17O8O2 → C20H34O13      | 3E-12 |                                       |
| 1671. PINALO2 + C10H17O8O2 → C20H34O12     | 3E-12 |                                       |
| 1672. C96CO3 + C10H17O8O2 → C20H34O12      | 3E-12 |                                       |
| 1673. C923CO3 + C10H17O8O2 → C20H34O12     | 3E-12 |                                       |
| 1674. LIMAO2 + C10H17O8O2 → C20H34O11      | 3E-12 |                                       |
| 1675. LIMALBO2 + C10H17O8O2 → C20H34O12    | 3E-12 |                                       |
| 1676. LIMCO2 + C10H17O8O2 → C20H34O11      | 3E-12 |                                       |
| 1677. LIMALO2 + C10H17O8O2 → C20H34O12     | 3E-12 |                                       |
| 1678. LIMBO2 + C10H17O8O2 → C20H34O11      | 3E-12 |                                       |
| 1679. LIMALAO2 + C10H17O8O2 → C20H34O12    | 3E-12 |                                       |
| 1680. BPINAO2 + C10H17O8O2 → C20H34O11     | 3E-12 |                                       |
| 1681. BPINBO2 + C10H17O8O2 → C20H34O11     | 3E-12 |                                       |
| 1682. BPINCO2 + C10H17O8O2 → C20H34O11     | 3E-12 |                                       |
| 1683. C918CO3 + C10H17O8O2 → C20H34O12     | 3E-12 |                                       |
| 1684. NAPINAO2 + C10H17O8O2 → C20H35O10NO3 | 3E-12 | HOM dimers containing NO <sub>3</sub> |
| 1685. NAPINBO2 + C10H17O8O2 → C20H35O10NO3 | 3E-12 | HOM dimers containing NO <sub>3</sub> |
| 1686. NC102O2 + C10H17O8O2 → C20H35O11NO3  | 3E-12 | HOM dimers containing NO <sub>3</sub> |
| 1687. NC101O2 + C10H17O8O2 → C20H35O11NO3  | 3E-12 | HOM dimers containing NO <sub>3</sub> |
| 1688. NLIMO2 + C10H17O8O2 → C20H35O10NO3   | 3E-12 | HOM dimers containing NO <sub>3</sub> |
| 1689. NLIMALO2 + C10H17O8O2 → C20H35O11NO3 | 3E-12 | HOM dimers containing NO <sub>3</sub> |
| 1690. NC91CO3 + C10H17O8O2 → C20H35O11NO3  | 3E-12 | HOM dimers containing NO <sub>3</sub> |
| 1691. NBPINAO2 + C10H17O8O2 → C20H35O10NO3 | 3E-12 | HOM dimers containing NO <sub>3</sub> |
| 1692. NBPINBO2 + C10H17O8O2 → C20H35O10NO3 | 3E-12 | HOM dimers containing NO <sub>3</sub> |
|                                            |       |                                       |
| 1693. C96O2 + C10H17O8O2 → C19H32O11       | 3E-12 |                                       |
| 1694. C89CO3 + C10H17O8O2 → C19H32O12      | 3E-12 |                                       |
| 1695. C920O2 + C10H17O8O2 → C19H32O12      | 3E-12 |                                       |
| 1696. C97O2 + C10H17O8O2 → C19H32O12       | 3E-12 |                                       |
| 1697. C85CO3 + C10H17O8O2 → C19H32O12      | 3E-12 |                                       |
| 1698. C811CO3 + C10H17O8O2 → C19H32O13     | 3E-12 |                                       |
| 1699. C921O2 + C10H17O8O2 → C19H32O13      | 3E-12 |                                       |
| 1700. C98O2 + C10H17O8O2 → C19H32O13       | 3E-12 |                                       |
| 1701. C922O2+ C10H17O8O2 → C19H32O14       | 3E-12 |                                       |

|                                           |       |
|-------------------------------------------|-------|
| 1702. C923O2 + C10H17O8O2 → C19H32O11     | 3E-12 |
| 1703. C924O2 + C10H17O8O2 → C19H32O12     | 3E-12 |
| 1704. C816CO3 + C10H17O8O2 → C19H32O12    | 3E-12 |
| 1705. NORLIMO2 + C10H17O8O2 → C19H32O13   | 3E-12 |
| 1706. LMKAO2 + C10H17O8O2 → C19H32O12     | 3E-12 |
| 1707. LMKBO2 + C10H17O8O2 → C19H32O12     | 3E-12 |
| 1708. C926O2 + C10H17O8O2 → C19H32O13     | 3E-12 |
| 1709. C817CO3 + C10H17O8O2 → C19H32O13    | 3E-12 |
| 1710. LMLKAO2 + C10H17O8O2 → C19H32O13    | 3E-12 |
| 1711. LMLKBO2 + C10H17O8O2 → C19H32O13    | 3E-12 |
| 1712. C823CO3 + C10H17O8O2 → C19H32O13    | 3E-12 |
| 1713. C925O2 + C10H17O8O2 → C19H32O14     | 3E-12 |
| 1714. NOPINAO2+ C10H17O8O2 → C19H32O11    | 3E-12 |
| 1715. NOPINBO2+ C10H17O8O2 → C19H32O11    | 3E-12 |
| 1716. NOPINCO2+ C10H17O8O2 → C19H32O11    | 3E-12 |
| 1717. NOPINDO2+ C10H17O8O2 → C19H32O11    | 3E-12 |
| 1718. C918O2+ C10H17O8O2 → C19H32O12      | 3E-12 |
| 1719. C9DCO2+ C10H17O8O2 → C19H32O12      | 3E-12 |
| 1720. C915O2+ C10H17O8O2 → C19H32O12      | 3E-12 |
| 1721. C917O2+ C10H17O8O2 → C19H32O12      | 3E-12 |
| 1722. C919O2+ C10H17O8O2 → C19H32O13      | 3E-12 |
| 1723. C914O2+ C10H17O8O2 → C19H32O13      | 3E-12 |
| 1724. C916O2+ C10H17O8O2 → C19H32O13      | 3E-12 |
| 1725. C88CO3+ C10H17O8O2 → C19H32O13      | 3E-12 |
| 1726. C87CO3+ C10H17O8O2 → C19H32O14      | 3E-12 |
| 1727. C822CO3+ C10H17O8O2 → C19H32O12     | 3E-12 |
| 1728. NLMKAO2+ C10H17O8O2 → C19H33O11NO3  | 3E-12 |
|                                           |       |
| 1729. C85O2 + C10H17O8O2 → C18H30O11      | 3E-12 |
| 1730. C89O2 + C10H17O8O2 → C18H30O11      | 3E-12 |
| 1731. C86O2 + C10H17O8O2 → C18H30O12      | 3E-12 |
| 1732. C811O2 + C10H17O8O2 → C18H30O12     | 3E-12 |
| 1733. C810O2 + C10H17O8O2 → C18H30O12     | 3E-12 |
| 1734. C812O2 + C10H17O8O2 → C18H30O13     | 3E-12 |
| 1735. C813O2 + C10H17O8O2 → C18H30O11     | 3E-12 |
| 1736. C729CO3 + C10H17O8O2 → C18H30O12    | 3E-12 |
| 1737. C816O2 + C10H17O8O2 → C18H30O11     | 3E-12 |
| 1738. C817O2 + C10H17O8O2 → C18H30O12     | 3E-12 |
| 1739. C826O2 + C10H17O8O2 → C18H30O13     | 3E-12 |
| 1740. C822O2 + C10H17O8O2 → C18H30O11     | 3E-12 |
| 1741. C818O2 + C10H17O8O2 → C18H30O13     | 3E-12 |
| 1742. C823O2 + C10H17O8O2 → C18H30O12     | 3E-12 |
| 1743. C819O2 + C10H17O8O2 → C18H30O13     | 3E-12 |
| 1744. C727CO3 + C10H17O8O2 → C18H30O13    | 3E-12 |
| 1745. C731CO3 + C10H17O8O2 → C18H30O13    | 3E-12 |
| 1746. C824O2 + C10H17O8O2 → C18H30O12     | 3E-12 |
| 1747. C820O2 + C10H17O8O2 → C18H30O14     | 3E-12 |
| 1748. C825O2 + C10H17O8O2 → C18H30O13     | 3E-12 |
| 1749. C821O2 + C10H17O8O2 → C18H30O13     | 3E-12 |
| 1750. C732CO3 + C10H17O8O2 → C18H30O14    | 3E-12 |
| 1751. C8BCO2 + C10H17O8O2 → C18H30O10     | 3E-12 |
| 1752. C88O2 + C10H17O8O2 → C18H30O12      | 3E-12 |
| 1753. C718CO3 + C10H17O8O2 → C18H30O13    | 3E-12 |
| 1754. C87O2 + C10H17O8O2 → C18H30O13      | 3E-12 |
| 1755. C721CO3 + C10H17O8O2 → C18H30O13    | 3E-12 |
| 1756. NC826O2 + C10H17O8O2 → C18H31O12NO3 | 3E-12 |

**Autoxidation peroxy radicals reacting with other peroxy radicals with different branching ratios for a, b and c:**

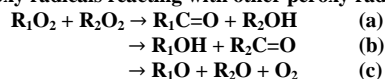

|                                 |               |                    |
|---------------------------------|---------------|--------------------|
| 1757. C10H17O3O2 → C10H16O4iso2 | 5E-12*0.2*RO2 | RO2 = ∑ RO2 in MCM |
| 1758. C10H17O3O2 → C10H17O3O    | 5E-12*0.6*RO2 | RO2 = ∑ RO2 in MCM |
| 1759. C10H17O3O2 → C10H18O4     | 5E-12*0.2*RO2 | RO2 = ∑ RO2 in MCM |
|                                 |               |                    |
| 1760. C10H17O4O2 → C10H16O5iso2 | 5E-12*0.2*RO2 | RO2 = ∑ RO2 in MCM |
| 1761. C10H17O4O2 → C10H17O4O    | 5E-12*0.6*RO2 | RO2 = ∑ RO2 in MCM |
| 1762. C10H17O4O2 → C10H18O5     | 5E-12*0.2*RO2 | RO2 = ∑ RO2 in MCM |
|                                 |               |                    |
| 1763. C10H17O5O2 → C10H16O6iso2 | 8E-12*0.2*RO2 | RO2 = ∑ RO2 in MCM |
| 1764. C10H17O5O2 → C10H17O5O    | 8E-12*0.6*RO2 | RO2 = ∑ RO2 in MCM |
| 1765. C10H17O5O2 → C10H18O6     | 8E-12*0.2*RO2 | RO2 = ∑ RO2 in MCM |
|                                 |               |                    |
| 1766. C10H17O6O2 → C10H16O7iso2 | 1E-11*0.3*RO2 | RO2 = ∑ RO2 in MCM |

|                                 |               |                                |
|---------------------------------|---------------|--------------------------------|
| 1767. C10H17O6O2 → C10H17O6O    | 1E-11*0.4*RO2 | RO2 = ∑ RO <sub>2</sub> in MCM |
| 1768. C10H17O6O2 → C10H18O7     | 1E-11*0.3*RO2 | RO2 = ∑ RO <sub>2</sub> in MCM |
| 1769. C10H17O7O2 → C10H16O8iso2 | 1E-11*0.4*RO2 | RO2 = ∑ RO <sub>2</sub> in MCM |
| 1770. C10H17O7O2 → C10H17O7O    | 1E-11*0.2*RO2 | RO2 = ∑ RO <sub>2</sub> in MCM |
| 1771. C10H17O7O2 → C10H18O8     | 1E-11*0.4*RO2 | RO2 = ∑ RO <sub>2</sub> in MCM |
| 1772. C10H17O8O2 → C10H16O9iso2 | 1E-11*0.5*RO2 | RO2 = ∑ RO <sub>2</sub> in MCM |
| 1773. C10H17O8O2 → C10H18O9     | 1E-11*0.5*RO2 | RO2 = ∑ RO <sub>2</sub> in MCM |

**Supplementary Table 5.** Correlation coefficients (*R*), normalized mean bias (*NMB*) (%) and the fraction of predictions within a factor of two of the observations (*FAC2*) for the control run (CTRL) and a simulation without dry deposition losses of HOM (NoDep).

| Species             | <i>R</i> | <i>NMB</i> | <i>FAC2</i> | <i>R</i> | <i>NMB</i> | <i>FAC2</i> |
|---------------------|----------|------------|-------------|----------|------------|-------------|
|                     | CTRL     | CTRL       | CTRL        | NoDep    | NoDep      | NoDep       |
| Tot. HOM            | 0.72     | 8          | 0.93        | 0.73     | 50         | 0.78        |
| Monomers            | 0.72     | 3          | 0.93        | 0.70     | 49         | 0.78        |
| Dimers              | 0.73     | -16        | 0.55        | 0.73     | 16         | 0.67        |
| HOM-NO <sub>3</sub> | 0.70     | -11        | 0.66        | 0.75     | 88         | 0.55        |
| HOM RO <sub>2</sub> | 0.60     | 67         | 0.61        | 0.60     | 75         | 0.55        |

**Supplementary Table 6.** Estimated Henry's law coefficients for all peroxy radical autoxidation products in PRAM<sup>1</sup>.

| PRAM name   | log <sub>10</sub> (H (M/atm))<br>SIMPOL <sup>5</sup> +<br>AIOMFAC <sup>7</sup> | log <sub>10</sub> (H (M/atm))<br>COSMO <sup>8-11</sup> |
|-------------|--------------------------------------------------------------------------------|--------------------------------------------------------|
| C10H15O2O2  | 3.17                                                                           |                                                        |
| C10H15O3O2  | 4.73                                                                           |                                                        |
| C10H15O4O2  | 5.95                                                                           |                                                        |
| C10H15O5O2  | 7.44                                                                           |                                                        |
| C10H15O6O2  | 7.77                                                                           |                                                        |
| C10H15O7O2  | 9.16                                                                           |                                                        |
| C10H15O8O2  | 10.56                                                                          |                                                        |
| C10H15O9O2  | 11.94                                                                          |                                                        |
| C10H15O10O2 | 13.43                                                                          |                                                        |
| C10H15O11O2 | 14.61                                                                          |                                                        |
| C10H15O12O2 | 15.49                                                                          |                                                        |
| C10H15O2O   | 3.17                                                                           |                                                        |
| C10H15O3O   | 4.73                                                                           |                                                        |
| C10H15O4O   | 5.95                                                                           |                                                        |
| C10H15O5O   | 7.44                                                                           |                                                        |
| C10H15O6O   | 7.77                                                                           |                                                        |
| C10H15O7O   | 9.16                                                                           |                                                        |
| C10H15O8O   | 10.56                                                                          |                                                        |
| C10H15O9O   | 11.94                                                                          |                                                        |
| C10H15O10O  | 13.43                                                                          |                                                        |
| C10H15O11O  | 14.61                                                                          |                                                        |
| C10H15O12O  | 15.49                                                                          |                                                        |
| C10H14O3    | 5.17                                                                           |                                                        |
| C10H14O4    | 6.29                                                                           |                                                        |
| C10H14O5    | 7.52                                                                           |                                                        |
| C10H14O6    | 8.94                                                                           |                                                        |
| C10H14O7    | 9.22                                                                           |                                                        |
| C10H14O8    | 10.58                                                                          |                                                        |
| C10H14O9    | 11.86                                                                          |                                                        |

|              |       |                                        |
|--------------|-------|----------------------------------------|
| C10H14O10    | 13.25 |                                        |
| C10H14O11    | 14.66 |                                        |
| C10H14O12    | 15.90 |                                        |
| C10H14O13    | 16.61 |                                        |
| C10H16O3     | 6.34  |                                        |
| C10H16O4iso1 | 9.11  |                                        |
| C10H16O5iso1 | 8.71  |                                        |
| C10H16O6iso1 | 10.30 | 8.15 <sup>a</sup> , 10.03 <sup>b</sup> |
| C10H16O7iso1 | 10.45 |                                        |
| C10H16O8iso1 | 11.87 |                                        |
| C10H16O9iso1 | 13.09 |                                        |
| C10H16O10    | 14.54 |                                        |
| C10H16O11    | 15.82 |                                        |
| C10H16O12    | 17.23 |                                        |
| C10H16O13    | 17.76 |                                        |
| C10H16O14    | 18.33 |                                        |
| C10H15O2NO3  | 4.64  |                                        |
| C10H15O3NO3  | 6.13  |                                        |
| C10H15O4NO3  | 8.30  |                                        |
| C10H15O5NO3  | 8.89  |                                        |
| C10H15O6NO3  | 9.53  |                                        |
| C10H15O7NO3  | 10.83 |                                        |
| C10H15O8NO3  | 12.29 |                                        |
| C10H15O9NO3  | 13.59 |                                        |
| C10H15O10NO3 | 15.17 |                                        |
| C10H15O11NO3 | 16.36 |                                        |
| C10H15O12NO3 | 17.45 |                                        |
| C20H30O5     | 6.85  |                                        |
| C20H30O6     | 7.14  |                                        |
| C20H30O7     | 10.19 |                                        |
| C20H30O8     | 9.55  |                                        |
| C20H30O9     | 11.93 |                                        |
| C20H30O10    | 11.58 |                                        |
| C20H30O11    | 14.64 |                                        |
| C20H30O12    | 14.42 |                                        |
| C20H30O13    | 17.27 |                                        |
| C20H30O14    | 17.13 |                                        |
| C20H30O15    | 20.65 |                                        |
| C20H30O16    | 19.16 |                                        |
| C20H30O17    | 21.91 |                                        |
| C20H31O4NO3  | 4.81  |                                        |
| C20H31O5NO3  | 6.56  |                                        |
| C20H31O6NO3  | 7.85  |                                        |
| C20H31O7NO3  | 11.37 |                                        |
| C20H31O8NO3  | 10.11 |                                        |
| C20H31O9NO3  | 13.12 |                                        |

---



|              |       |
|--------------|-------|
| C20H31O10NO3 | 13.07 |
| C20H31O11NO3 | 15.96 |
| C20H31O12NO3 | 16.01 |
| C20H31O13NO3 | 16.86 |
| C20H31O14NO3 | 18.59 |
| C20H31O15NO3 | 19.52 |
| C19H28O5     | 6.82  |
| C19H28O6     | 7.10  |
| C19H28O7     | 10.13 |
| C19H28O8     | 9.50  |
| C19H28O9     | 11.84 |
| C19H28O10    | 11.50 |
| C19H28O11    | 14.54 |
| C19H28O12    | 14.32 |
| C19H28O13    | 7.15  |
| C19H28O14    | 17.01 |
| C19H28O15    | 20.50 |
| C19H28O16    | 19.02 |
| C19H28O17    | 21.76 |
| C19H28O18    | 20.68 |
| C19H29O5NO3  | 6.53  |
| C19H29O6NO3  | 7.81  |
| C19H29O7NO3  | 11.32 |
| C19H29O8NO3  | 10.05 |
| C19H29O9NO3  | 13.05 |
| C19H29O10NO3 | 13.00 |
| C19H29O11NO3 | 15.87 |
| C19H29O12NO3 | 15.93 |
| C19H29O13NO3 | 16.76 |
| C19H29O14NO3 | 18.48 |
| C19H29O15NO3 | 19.42 |
| C18H26O4     | 4.61  |
| C18H26O5     | 6.79  |
| C18H26O6     | 7.05  |
| C18H26O7     | 10.06 |
| C18H26O8     | 9.44  |
| C18H26O9     | 11.74 |
| C18H26O10    | 11.41 |
| C18H26O11    | 14.43 |
| C18H26O12    | 14.21 |
| C18H26O13    | 17.02 |
| C18H26O14    | 16.89 |
| C18H26O15    | 20.33 |
| C18H26O16    | 18.87 |
| C18H26O17    | 21.59 |
| C18H26O18    | 20.52 |

---

|              |       |                                        |
|--------------|-------|----------------------------------------|
| C18H27O6NO3  | 7.39  |                                        |
| C18H27O7NO3  | 10.89 |                                        |
| C18H27O8NO3  | 9.63  |                                        |
| C18H27O9NO3  | 12.62 |                                        |
| C18H27O10NO3 | 12.57 |                                        |
| C18H27O11NO3 | 15.45 |                                        |
| C18H27O12NO3 | 15.50 |                                        |
| C18H27O13NO3 | 16.33 |                                        |
| C18H27O14NO3 | 18.05 |                                        |
| C18H27O15NO3 | 18.99 |                                        |
| C18H27O16NO3 | 20.49 |                                        |
| C10H17O3O2   | 5.54  |                                        |
| C10H17O4O2   | 8.49  |                                        |
| C10H17O5O2   | 5.21  |                                        |
| C10H17O6O2   | 8.38  |                                        |
| C10H17O7O2   | 9.06  |                                        |
| C10H17O8O2   | 11.73 |                                        |
| C10H17O3O    | 5.54  |                                        |
| C10H17O4O    | 8.49  |                                        |
| C10H17O5O    | 5.21  |                                        |
| C10H17O6O    | 8.38  |                                        |
| C10H17O7O    | 9.06  |                                        |
| C10H16O4iso2 | 8.09  |                                        |
| C10H16O5iso2 | 10.68 |                                        |
| C10H16O6iso2 | 7.85  | 7.30 <sup>a</sup> , 9.82 <sup>b</sup>  |
| C10H16O7iso2 | 10.55 |                                        |
| C10H16O8iso2 | 11.24 |                                        |
| C10H16O9iso2 | 13.74 |                                        |
| C10H18O4     | 10.17 |                                        |
| C10H18O5     | 11.37 |                                        |
| C10H18O6     | 8.82  | 9.24 <sup>a</sup> , 11.86 <sup>b</sup> |
| C10H18O7     | 11.29 |                                        |
| C10H18O8     | 11.03 |                                        |
| C10H18O9     | 11.04 |                                        |
| C10H18O10    | 13.90 |                                        |
| C10H17O3NO3  | 7.26  |                                        |
| C10H17O4NO3  | 10.46 |                                        |
| C10H17O5NO3  | 7.17  |                                        |
| C10H17O6NO3  | 10.27 |                                        |
| C10H17O7NO3  | 10.04 |                                        |
| C10H17O8NO3  | 13.01 |                                        |
| C20H34O6     | 7.43  |                                        |
| C20H34O7     | 9.08  |                                        |
| C20H34O8     | 7.14  |                                        |
| C20H34O9     | 11.50 |                                        |
| C20H34O10    | 11.26 |                                        |

---

|              |       |
|--------------|-------|
| C20H34O11    | 14.22 |
| C20H34O12    | 17.17 |
| C20H34O13    | 16.97 |
| C20H35O5NO3  | 5.58  |
| C20H35O6NO3  | 9.17  |
| C20H35O7NO3  | 10.27 |
| C20H35O8NO3  | 8.99  |
| C20H35O9NO3  | 12.37 |
| C20H35O10NO3 | 11.92 |
| C20H35O11NO3 | 14.10 |
| C19H32O6     | 7.41  |
| C19H32O7     | 9.05  |
| C19H32O8     | 7.11  |
| C19H32O9     | 11.42 |
| C19H32O10    | 11.18 |
| C19H32O11    | 14.12 |
| C19H32O12    | 17.05 |
| C19H32O13    | 16.86 |
| C19H32O14    | 19.05 |
| C19H33O6NO3  | 9.14  |
| C19H33O7NO3  | 10.77 |
| C19H33O8NO3  | 8.96  |
| C19H33O9NO3  | 12.32 |
| C19H33O10NO3 | 11.87 |
| C19H33O11NO3 | 14.05 |
| C18H30O5     | 6.45  |
| C18H30O6     | 7.38  |
| C18H30O7     | 9.01  |
| C18H30O8     | 7.08  |
| C18H30O9     | 11.34 |
| C18H30O10    | 11.09 |
| C18H30O11    | 14.02 |
| C18H30O12    | 17.24 |
| C18H30O13    | 16.75 |
| C18H30O14    | 18.94 |
| C18H31O7NO3  | 10.73 |
| C18H31O8NO3  | 8.92  |
| C18H31O9NO3  | 12.27 |
| C18H31O10NO3 | 11.82 |
| C18H31O11NO3 | 14.00 |
| C18H31O12NO3 | 14.25 |

---

a) Using all conformers

b) Using only conformers with the minimum number of H-bonds (0 full and 0 partial H-bonds for C<sub>10</sub>H<sub>16</sub>O<sub>6</sub>iso1 and C<sub>10</sub>H<sub>16</sub>O<sub>6</sub>iso2; 0 full and 1 partial H-bond for C<sub>10</sub>H<sub>18</sub>O<sub>6</sub>).

**Supplementary Table 7.** List of all reactions and their reaction rates in an alternative reduced PRAM<sup>1</sup> version without explicit representation of individual HOM dimer species formation.

**Initial Criegee intermediate unimolecular reactions to peroxy radicals via the vinylhydroperoxide pathway<sup>5</sup> which continue to react according to the original MCMv3.3.1 mechanism (R1-R2, R4-R5) or initialize the peroxy radical autoxidation in PRAM (R3 and R6)**

|                              |            |              |
|------------------------------|------------|--------------|
| 1. APINOOA → C107O2 + OH     | KDEC*0.495 | To MCM chem. |
| 2. APINOOA → C109O2 + OH     | KDEC*0.405 | To MCM chem. |
| 3. APINOOA → C10H15O2O2 + OH | KDEC*0.10  | To PRAM      |
| 4. LIMOOA → LIMALAO2 + OH    | KDEC*0.35  | To MCM chem. |
| 5. LIMOOA → LIMALBO2 + OH    | KDEC*0.35  | To MCM chem. |
| 6. LIMOOA → C10H15O2O2 + OH  | KDEC*0.30  | To PRAM      |

**Lumped reactions describing the initial reactions between a monoterpene (MT) and OH forming a RO<sub>2</sub> with 3 oxygen atoms (C<sub>10</sub>H<sub>17</sub>OO<sub>2</sub>) that rapidly undergo a first intramolecular hydrogen shift and O<sub>2</sub> addition and form a new RO<sub>2</sub> with 5 oxygen atoms (C<sub>10</sub>H<sub>17</sub>O<sub>3</sub>O<sub>2</sub>).**

**MT + OH → C<sub>10</sub>H<sub>17</sub>OO<sub>2</sub>**

**C<sub>10</sub>H<sub>17</sub>OO<sub>2</sub> + O<sub>2</sub> → C<sub>10</sub>H<sub>17</sub>O<sub>3</sub>O<sub>2</sub> (Fast)**

|                               |                          |         |
|-------------------------------|--------------------------|---------|
| 7. APINENE + OH → C10H17O3O2  | 0.025*1.2E-11*EXP(440/T) | To PRAM |
| 8. BPINENE + OH → C10H17O3O2  | 0.01*2.38E-11*EXP(357/T) | To PRAM |
| 9. LIMONENE + OH → C10H17O3O2 | 0.01*4.28E-11*EXP(401/T) | To PRAM |
| 10. CARENE + OH → C10H17O3O2  | 0.025*1.6E-11*EXP(500/T) | To PRAM |

**Peroxy radical autoxidation and HOM formation after O<sub>3</sub> oxidation of monoterpenes (R11-R1154)**

**Autoxidation reaction rates (H-shifts + O<sub>2</sub>)**

|                               |                      |                      |
|-------------------------------|----------------------|----------------------|
| 11. C10H15O2O2 → C10H15O4O2   | 1.2E17*EXP(-12077/T) | Unit s <sup>-1</sup> |
| 12. C10H15O3O2 → C10H15O5O2   | 1.2E18*EXP(-12077/T) | Unit s <sup>-1</sup> |
| 13. C10H15O4O2 → C10H15O6O2   | 1.2E18*EXP(-12077/T) | Unit s <sup>-1</sup> |
| 14. C10H15O5O2 → C10H15O7O2   | 6E17*EXP(-12077/T)   | Unit s <sup>-1</sup> |
| 15. C10H15O6O2 → C10H15O8O2   | 2E17*EXP(-12077/T)   | Unit s <sup>-1</sup> |
| 16. C10H15O7O2 → C10H15O9O2   | 1.2E17*EXP(-12077/T) | Unit s <sup>-1</sup> |
| 17. C10H15O8O2 → C10H15O10O2  | 1.2E17*EXP(-12077/T) | Unit s <sup>-1</sup> |
| 18. C10H15O9O2 → C10H15O11O2  | 1.2E16*EXP(-12077/T) | Unit s <sup>-1</sup> |
| 19. C10H15O10O2 → C10H15O12O2 | 0.0                  | Unit s <sup>-1</sup> |

**Isomerization of alkoxy radicals (RO) followed by reaction with O<sub>2</sub> to make new peroxy radicals:**

**RO· → ·ROH**

**·ROH + O<sub>2</sub> → RO<sub>2</sub>·**

**Net: RO· + O<sub>2</sub> → RO<sub>2</sub>·**

|                              |      |                      |
|------------------------------|------|----------------------|
| 20. C10H15O2O → C10H15O3O2   | KDEC | Unit s <sup>-1</sup> |
| 21. C10H15O3O → C10H15O4O2   | KDEC | Unit s <sup>-1</sup> |
| 22. C10H15O4O → C10H15O5O2   | KDEC | Unit s <sup>-1</sup> |
| 23. C10H15O5O → C10H15O6O2   | KDEC | Unit s <sup>-1</sup> |
| 24. C10H15O6O → C10H15O7O2   | KDEC | Unit s <sup>-1</sup> |
| 25. C10H15O7O → C10H15O8O2   | KDEC | Unit s <sup>-1</sup> |
| 26. C10H15O8O → C10H15O9O2   | KDEC | Unit s <sup>-1</sup> |
| 27. C10H15O9O → C10H15O10O2  | KDEC | Unit s <sup>-1</sup> |
| 28. C10H15O10O → C10H15O11O2 | KDEC | Unit s <sup>-1</sup> |
| 29. C10H15O11O → C10H15O12O2 | KDEC | Unit s <sup>-1</sup> |

**Peroxy radicals reacting with NO and forming an alkoxy radical and NO<sub>2</sub> (RO<sub>2</sub> + NO → RO + NO<sub>2</sub>)**

*The rate for the reactions between autoxidation RO<sub>2</sub> and NO was set to the same values used in MCMv3.3.1 (KRO2NO)*

|                                                     |             |
|-----------------------------------------------------|-------------|
| 30. C10H15O2O2 + NO → C10H15O2O + NO <sub>2</sub>   | KRO2NO*1.0  |
| 31. C10H15O3O2 + NO → C10H15O3O + NO <sub>2</sub>   | KRO2NO*1.0  |
| 32. C10H15O4O2 + NO → C10H15O4O + NO <sub>2</sub>   | KRO2NO*1.0  |
| 33. C10H15O5O2 + NO → C10H15O5O + NO <sub>2</sub>   | KRO2NO*0.9  |
| 34. C10H15O6O2 + NO → C10H15O6O + NO <sub>2</sub>   | KRO2NO*0.85 |
| 35. C10H15O7O2 + NO → C10H15O7O + NO <sub>2</sub>   | KRO2NO*0.8  |
| 36. C10H15O8O2 + NO → C10H15O8O + NO <sub>2</sub>   | KRO2NO*0.6  |
| 37. C10H15O9O2 + NO → C10H15O9O + NO <sub>2</sub>   | KRO2NO*0.5  |
| 38. C10H15O10O2 + NO → C10H15O10O + NO <sub>2</sub> | KRO2NO*0.3  |
| 39. C10H15O11O2 + NO → C10H15O11O + NO <sub>2</sub> | 0.0         |
| 40. C10H15O12O2 + NO → C10H15O12O + NO <sub>2</sub> | 0.0         |

**Lumped reactions describing the fragmentation of autoxidation products when they react with NO (RO<sub>2</sub> + NO → RO + NO<sub>2</sub>) followed by fast fragmentation of the formed alkoxy radicals).**

*The fragmentation products are assumed to be the MCM compounds C717O2 (a peroxy radical) and CH3COCH3 (acetone) irrespectively of which autoxidation peroxy radical that react with NO. This is a simplification that violates the mass balance for O atoms but not for the N and C atoms.*

|                                                           |             |
|-----------------------------------------------------------|-------------|
| 41. C10H15O2O2 + NO → C717O2 + CH3COCH3 + NO <sub>2</sub> | 0.0         |
| 42. C10H15O3O2 + NO → C717O2 + CH3COCH3 + NO <sub>2</sub> | 0.0         |
| 43. C10H15O4O2 + NO → C717O2 + CH3COCH3 + NO <sub>2</sub> | 0.0         |
| 44. C10H15O5O2 + NO → C717O2 + CH3COCH3 + NO <sub>2</sub> | KRO2NO*0.04 |
| 45. C10H15O6O2 + NO → C717O2 + CH3COCH3 + NO <sub>2</sub> | KRO2NO*0.06 |

|                                                |             |
|------------------------------------------------|-------------|
| 46. C10H15O7O2 + NO → C717O2 + CH3COCH3+NO2    | KRO2NO*0.08 |
| 47. C10H15O8O2 + NO → C717O2 + CH3COCH3 + NO2  | KRO2NO*0.16 |
| 48. C10H15O9O2 + NO → C717O2 + CH3COCH3+NO2    | KRO2NO*0.20 |
| 49. C10H15O10O2 + NO → C717O2 + CH3COCH3 + NO2 | KRO2NO*0.28 |
| 50. C10H15O11O2 + NO → C717O2 + CH3COCH3+NO2   | KRO2NO*0.40 |
| 51. C10H15O12O2 + NO → C717O2 + CH3COCH3+NO2   | KRO2NO*0.40 |

**Peroxy radicals reacting with NO forming monomers with an additional carbonyl group:**

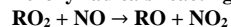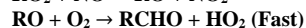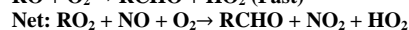

|                                                                      |              |
|----------------------------------------------------------------------|--------------|
| 52. C10H15O2O2 + NO → C10H14O3 + NO <sub>2</sub> + HO <sub>2</sub>   | 0.0          |
| 53. C10H15O3O2 + NO → C10H14O4 + NO <sub>2</sub> + HO <sub>2</sub>   | 0.0          |
| 54. C10H15O4O2 + NO → C10H14O5 + NO <sub>2</sub> + HO <sub>2</sub>   | 0.0          |
| 55. C10H15O5O2 + NO → C10H14O6 + NO <sub>2</sub> + HO <sub>2</sub>   | KRO2NO*0.042 |
| 56. C10H15O6O2 + NO → C10H14O7 + NO <sub>2</sub> + HO <sub>2</sub>   | KRO2NO*0.063 |
| 57. C10H15O7O2 + NO → C10H14O8 + NO <sub>2</sub> + HO <sub>2</sub>   | KRO2NO*0.084 |
| 58. C10H15O8O2 + NO → C10H14O9 + NO <sub>2</sub> + HO <sub>2</sub>   | KRO2NO*0.168 |
| 59. C10H15O9O2 + NO → C10H14O10 + NO <sub>2</sub> + HO <sub>2</sub>  | KRO2NO*0.210 |
| 60. C10H15O10O2 + NO → C10H14O11 + NO <sub>2</sub> + HO <sub>2</sub> | KRO2NO*0.294 |
| 61. C10H15O11O2 + NO → C10H14O12 + NO <sub>2</sub> + HO <sub>2</sub> | KRO2NO*0.420 |
| 62. C10H15O12O2 + NO → C10H14O13 + NO <sub>2</sub> + HO <sub>2</sub> | KRO2NO*0.420 |

**Peroxy radicals reacting with NO forming compounds with a nitrate functional group (RO<sub>2</sub> + NO → RNO<sub>3</sub>)**

|                                     |              |
|-------------------------------------|--------------|
| 63. C10H15O2O2 + NO → C10H15O2NO3   | 0.0          |
| 64. C10H15O3O2 + NO → C10H15O3NO3   | 0.0          |
| 65. C10H15O4O2 + NO → C10H15O4NO3   | 0.0          |
| 66. C10H15O5O2 + NO → C10H15O5NO3   | KRO2NO*0.018 |
| 67. C10H15O6O2 + NO → C10H15O6NO3   | KRO2NO*0.027 |
| 68. C10H15O7O2 + NO → C10H15O7NO3   | KRO2NO*0.036 |
| 69. C10H15O8O2 + NO → C10H15O8NO3   | KRO2NO*0.072 |
| 70. C10H15O9O2 + NO → C10H15O9NO3   | KRO2NO*0.090 |
| 71. C10H15O10O2 + NO → C10H15O10NO3 | KRO2NO*0.126 |
| 72. C10H15O11O2 + NO → C10H15O11NO3 | KRO2NO*0.180 |
| 73. C10H15O12O2 + NO → C10H15O12NO3 | KRO2NO*0.180 |

**Peroxy radicals reacting with HO<sub>2</sub> forming compounds with a hydrogen peroxide functional group (RO<sub>2</sub> + HO<sub>2</sub> → ROOH + O<sub>2</sub>)**

|                                                 |         |
|-------------------------------------------------|---------|
| 74. C10H15O2O2 + HO <sub>2</sub> → C10H16O4iso1 | KRO2HO2 |
| 75. C10H15O3O2 + HO <sub>2</sub> → C10H16O5iso1 | KRO2HO2 |
| 76. C10H15O4O2 + HO <sub>2</sub> → C10H16O6iso1 | KRO2HO2 |
| 77. C10H15O5O2 + HO <sub>2</sub> → C10H16O7iso1 | KRO2HO2 |
| 78. C10H15O6O2 + HO <sub>2</sub> → C10H16O8iso1 | KRO2HO2 |
| 79. C10H15O7O2 + HO <sub>2</sub> → C10H16O9iso1 | KRO2HO2 |
| 80. C10H15O8O2 + HO <sub>2</sub> → C10H16O10    | KRO2HO2 |
| 81. C10H15O9O2 + HO <sub>2</sub> → C10H16O11    | KRO2HO2 |
| 82. C10H15O10O2 + HO <sub>2</sub> → C10H16O12   | KRO2HO2 |
| 83. C10H15O11O2 + HO <sub>2</sub> → C10H16O13   | KRO2HO2 |
| 84. C10H15O12O2 + HO <sub>2</sub> → C10H16O14   | KRO2HO2 |

**Peroxy radicals reacting with other peroxy radicals forming dimers (RO<sub>2</sub> + RO<sub>2</sub> → ROOR + O<sub>2</sub>)**

|                             |           |                                |
|-----------------------------|-----------|--------------------------------|
| 85. C10H15O2O2 → C20H30O13  | 1E-13*RO2 | RO2 = ∑ RO <sub>2</sub> in MCM |
| 86. C10H15O3O2 → C20H30O13  | 1E-13*RO2 | RO2 = ∑ RO <sub>2</sub> in MCM |
| 87. C10H15O4O2 → C20H30O13  | 1E-13*RO2 | RO2 = ∑ RO <sub>2</sub> in MCM |
| 88. C10H15O5O2 → C20H30O13  | 5E-13*RO2 | RO2 = ∑ RO <sub>2</sub> in MCM |
| 89. C10H15O6O2 → C20H30O13  | 2E-12*RO2 | RO2 = ∑ RO <sub>2</sub> in MCM |
| 90. C10H15O7O2 → C20H30O13  | 3E-12*RO2 | RO2 = ∑ RO <sub>2</sub> in MCM |
| 91. C10H15O8O2 → C20H30O13  | 3E-12*RO2 | RO2 = ∑ RO <sub>2</sub> in MCM |
| 92. C10H15O9O2 → C20H30O13  | 5E-12*RO2 | RO2 = ∑ RO <sub>2</sub> in MCM |
| 93. C10H15O10O2 → C20H30O13 | 5E-12*RO2 | RO2 = ∑ RO <sub>2</sub> in MCM |
| 94. C10H15O11O2 → C20H30O13 | 5E-12*RO2 | RO2 = ∑ RO <sub>2</sub> in MCM |
| 95. C10H15O12O2 → C20H30O13 | 5E-12*RO2 | RO2 = ∑ RO <sub>2</sub> in MCM |

**Autoxidation peroxy radicals reacting with other peroxy radicals with different branching ratios for a, b and c:**

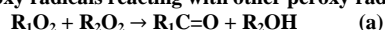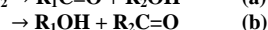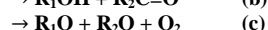

|                                |               |                                |
|--------------------------------|---------------|--------------------------------|
| 96. C10H15O2O2 → C10H14O3      | 1E-12*0.2*RO2 | RO2 = ∑ RO <sub>2</sub> in MCM |
| 97. C10H15O2O2 → C10H15O2O     | 1E-12*0.6*RO2 | RO2 = ∑ RO <sub>2</sub> in MCM |
| 98. C10H15O2O2 → C10H16O3      | 1E-12*0.2*RO2 | RO2 = ∑ RO <sub>2</sub> in MCM |
| 99. C10H15O3O2 → C10H14O4      | 5E-12*0.2*RO2 | RO2 = ∑ RO <sub>2</sub> in MCM |
| 100. C10H15O3O2 → C10H15O3O    | 5E-12*0.6*RO2 | RO2 = ∑ RO <sub>2</sub> in MCM |
| 101. C10H15O3O2 → C10H16O4iso1 | 5E-12*0.2*RO2 | RO2 = ∑ RO <sub>2</sub> in MCM |

|                                |                  |                             |
|--------------------------------|------------------|-----------------------------|
| 102. C10H15O4O2 → C10H14O5     | 5E-12*0.2*RO2    | RO2 = ∑ RO2 in MCM          |
| 103. C10H15O4O2 → C10H15O4O    | 5E-12*0.6*RO2    | RO2 = ∑ RO2 in MCM          |
| 104. C10H15O4O2 → C10H16O5iso1 | 5E-12*0.2*RO2    | RO2 = ∑ RO2 in MCM          |
| 105. C10H15O5O2 → C10H14O6     | 5E-12*0.2*RO2    | RO2 = ∑ RO2 in MCM          |
| 106. C10H15O5O2 → C10H15O5O    | 5E-12*0.6*RO2    | RO2 = ∑ RO2 in MCM          |
| 107. C10H15O5O2 → C10H16O6iso1 | 5E-12*0.2*RO2    | RO2 = ∑ RO2 in MCM          |
| 108. C10H15O6O2 → C10H14O7     | 7E-12*0.4*RO2    | RO2 = ∑ RO2 in MCM          |
| 109. C10H15O6O2 → C10H15O6O    | 7E-12*0.4*RO2    | RO2 = ∑ RO2 in MCM          |
| 110. C10H15O6O2 → C10H16O7iso1 | 7E-12*0.2*RO2    | RO2 = ∑ RO2 in MCM          |
| 111. C10H15O7O2 → C10H14O8     | 8E-12*0.2*RO2    | RO2 = ∑ RO2 in MCM          |
| 112. C10H15O7O2 → C10H15O7O    | 8E-12*0.4*RO2    | RO2 = ∑ RO2 in MCM          |
| 113. C10H15O7O2 → C10H16O8iso1 | 8E-12*0.4*RO2    | RO2 = ∑ RO2 in MCM          |
| 114. C10H15O8O2 → C10H14O9     | 9E-12*0.4*RO2    | RO2 = ∑ RO2 in MCM          |
| 115. C10H15O8O2 → C10H15O8O    | 9E-12*0.2*RO2    | RO2 = ∑ RO2 in MCM          |
| 116. C10H15O8O2 → C10H16O9iso1 | 9E-12*0.4*RO2    | RO2 = ∑ RO2 in MCM          |
| 117. C10H15O9O2 → C10H14O10    | 1E-11*0.3*RO2    | RO2 = ∑ RO2 in MCM          |
| 118. C10H15O9O2 → C10H15O9O    | 1E-11*0.2*RO2    | RO2 = ∑ RO2 in MCM          |
| 119. C10H15O9O2 → C10H16O10    | 1E-11*0.5*RO2    | RO2 = ∑ RO2 in MCM          |
| 120. C10H15O10O2 → C10H14O11   | 1E-11*0.5*RO2    | RO2 = ∑ RO2 in MCM          |
| 121. C10H15O10O2 → C10H15O10O  | 1E-11*0.2*RO2    | RO2 = ∑ RO2 in MCM          |
| 122. C10H15O10O2 → C10H16O11   | 1E-11*0.3*RO2    | RO2 = ∑ RO2 in MCM          |
| 123. C10H15O11O2 → C10H14O12   | 1E-11*0.4*RO2    | RO2 = ∑ RO2 in MCM          |
| 124. C10H15O11O2 → C10H15O11O  | 1E-11*0.2*RO2    | RO2 = ∑ RO2 in MCM          |
| 125. C10H15O11O2 → C10H16O12   | 1E-11*0.4*RO2    | RO2 = ∑ RO2 in MCM          |
| 126. C10H15O12O2 → C10H14O13   | 1E-11*0.5*RO2    | RO2 = ∑ RO2 in MCM          |
| 127. C10H15O12O2 → C10H15O12O  | 1E-11*0.0*RO2    | RO2 = ∑ RO2 in MCM          |
| 128. C10H15O12O2 → C10H16O13   | 1E-11*0.5*RO2    | RO2 = ∑ RO2 in MCM          |
| 129. C107O2 → C10H15O2O        | 9.4E-14*RO2*0.1  | To PRAM, RO2 = ∑ RO2 in MCM |
| 130. C107O2 → C107O            | 9.4E-14*RO2*0.63 | To MCM, RO2 = ∑ RO2 in MCM  |
| 131. C107O2 → C107OH           | 9.4E-14*RO2*0.27 | To MCM, RO2 = ∑ RO2 in MCM  |

### Peroxy radical autoxidation and HOM formation after OH oxidation of monoterpenes (R132-R192)

#### Autoxidation reaction rates (H-shifts + O<sub>2</sub>)

|                              |                    |                      |
|------------------------------|--------------------|----------------------|
| 132. C10H17O3O2 → C10H17O5O2 | 2E17*EXP(-12077/T) | Unit s <sup>-1</sup> |
| 133. C10H17O4O2 → C10H17O6O2 | 6E16*EXP(-12077/T) | Unit s <sup>-1</sup> |
| 134. C10H17O5O2 → C10H17O7O2 | 6E16*EXP(-12077/T) | Unit s <sup>-1</sup> |
| 135. C10H17O6O2 → C10H17O8O2 | 3E16*EXP(-12077/T) | Unit s <sup>-1</sup> |

#### Isomerization of alkoxy radicals (RO) followed by reaction with O<sub>2</sub> to make new peroxy radicals (RO· → ROH, ·ROH + O<sub>2</sub> → RO<sub>2</sub>)

|                             |      |                      |
|-----------------------------|------|----------------------|
| 136. C10H17O3O → C10H17O4O2 | KDEC | Unit s <sup>-1</sup> |
| 137. C10H17O4O → C10H17O5O2 | KDEC | Unit s <sup>-1</sup> |
| 138. C10H17O5O → C10H17O6O2 | KDEC | Unit s <sup>-1</sup> |
| 139. C10H17O6O → C10H17O7O2 | KDEC | Unit s <sup>-1</sup> |
| 140. C10H17O7O → C10H17O8O2 | KDEC | Unit s <sup>-1</sup> |

#### Peroxy radicals reacting with NO and forming an alkoxy radical and NO<sub>2</sub> (RO<sub>2</sub> + NO → RO + NO<sub>2</sub>)

The rate for the reactions between autoxidation RO<sub>2</sub> and NO was set to the same values used in MCMv3.3.1 (KRO2NO)

|                                        |            |
|----------------------------------------|------------|
| 141. C10H17O3O2 + NO → C10H17O3O + NO2 | KRO2NO*1.0 |
| 142. C10H17O4O2 + NO → C10H17O4O + NO2 | KRO2NO*0.9 |
| 143. C10H17O5O2 + NO → C10H17O5O + NO2 | KRO2NO*0.8 |
| 144. C10H17O6O2 + NO → C10H17O6O + NO2 | KRO2NO*0.7 |
| 145. C10H17O7O2 + NO → C10H17O7O + NO2 | KRO2NO*0.5 |

#### Lumped reactions describing the fragmentation of autoxidation products when they react with NO (RO<sub>2</sub> + NO → RO + NO<sub>2</sub>) followed by fast fragmentation of the formed alkoxy radicals).

The fragmentation products are assumed to be the MCM compounds C717O2 (a peroxy radical) and CH3COCH3 (acetone) irrespectively of which autoxidation peroxy radical that react with NO. This is a simplification that violates the mass balance for O atoms but not for the N and C atoms.

|                                                |             |
|------------------------------------------------|-------------|
| 146. C10H17O3O2 + NO → C717O2 + CH3COCH3 + NO2 | 0.0         |
| 147. C10H17O4O2 + NO → C717O2 + CH3COCH3 + NO2 | KRO2NO*0.04 |
| 148. C10H17O5O2 + NO → C717O2 + CH3COCH3 + NO2 | KRO2NO*0.08 |
| 149. C10H17O6O2 + NO → C717O2 + CH3COCH3 + NO2 | KRO2NO*0.12 |
| 150. C10H17O7O2 + NO → C717O2 + CH3COCH3 + NO2 | KRO2NO*0.20 |
| 151. C10H17O8O2 + NO → C717O2 + CH3COCH3 + NO2 | KRO2NO*0.40 |

**Peroxy radicals reacting with NO forming monomers with an additional carbonyl group:**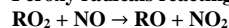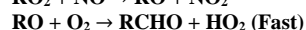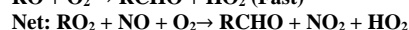

|                                                 |              |
|-------------------------------------------------|--------------|
| 152. C10H17O3O2 + NO → C10H16O4iso2 + NO2 + HO2 | 0.0          |
| 153. C10H17O4O2 + NO → C10H16O5iso2 + NO2 + HO2 | KRO2NO*0.042 |
| 154. C10H17O5O2 + NO → C10H16O6iso2 + NO2 + HO2 | KRO2NO*0.084 |
| 155. C10H17O6O2 + NO → C10H16O7iso2 + NO2 + HO2 | KRO2NO*0.126 |
| 156. C10H17O7O2 + NO → C10H16O8iso2 + NO2 + HO2 | KRO2NO*0.21  |
| 157. C10H17O8O2 + NO → C10H16O9iso2 + NO2 + HO2 | KRO2NO*0.42  |

**Peroxy radicals reacting with NO forming compounds with a nitrate functional group (RO<sub>2</sub> + NO → RNO<sub>3</sub>)**

|                                    |              |
|------------------------------------|--------------|
| 158. C10H17O3O2 + NO → C10H17O3NO3 | 0.0          |
| 159. C10H17O4O2 + NO → C10H17O4NO3 | KRO2NO*0.018 |
| 160. C10H17O5O2 + NO → C10H17O5NO3 | KRO2NO*0.036 |
| 161. C10H17O6O2 + NO → C10H17O6NO3 | KRO2NO*0.054 |
| 162. C10H17O7O2 + NO → C10H17O7NO3 | KRO2NO*0.090 |
| 163. C10H17O8O2 + NO → C10H17O8NO3 | KRO2NO*0.180 |

**Peroxy radicals reacting with HO<sub>2</sub> forming compounds with a hydrogen peroxide functional group (RO<sub>2</sub> + HO<sub>2</sub> → ROOH + O<sub>2</sub>)**

|                                   |         |
|-----------------------------------|---------|
| 164. C10H17O3O2 + HO2 → C10H18O5  | KRO2HO2 |
| 165. C10H17O4O2 + HO2 → C10H18O6  | KRO2HO2 |
| 166. C10H17O5O2 + HO2 → C10H18O7  | KRO2HO2 |
| 167. C10H17O6O2 + HO2 → C10H18O8  | KRO2HO2 |
| 168. C10H17O7O2 + HO2 → C10H18O9  | KRO2HO2 |
| 169. C10H17O8O2 + HO2 → C10H18O10 | KRO2HO2 |

**Peroxy radicals reacting with other peroxy radicals forming dimers (RO<sub>2</sub> + RO<sub>2</sub> → ROOR + O<sub>2</sub>)**

|                             |           |                                |
|-----------------------------|-----------|--------------------------------|
| 170. C10H17O3O2 → C20H34O10 | 1E-13*RO2 | RO2 = ∑ RO <sub>2</sub> in MCM |
| 171. C10H17O4O2 → C20H34O10 | 1E-13*RO2 | RO2 = ∑ RO <sub>2</sub> in MCM |
| 172. C10H17O5O2 → C20H34O10 | 5E-13*RO2 | RO2 = ∑ RO <sub>2</sub> in MCM |
| 173. C10H17O6O2 → C20H34O10 | 5E-13*RO2 | RO2 = ∑ RO <sub>2</sub> in MCM |
| 174. C10H17O7O2 → C20H34O10 | 5E-13*RO2 | RO2 = ∑ RO <sub>2</sub> in MCM |
| 175. C10H17O8O2 → C20H34O10 | 5E-13*RO2 | RO2 = ∑ RO <sub>2</sub> in MCM |

**Autoxidation peroxy radicals reacting with other peroxy radicals with different branching ratios for a, b and c:**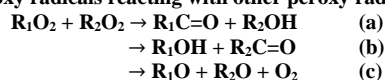

|                                |               |                                |
|--------------------------------|---------------|--------------------------------|
| 176. C10H17O3O2 → C10H16O4iso2 | 5E-12*0.2*RO2 | RO2 = ∑ RO <sub>2</sub> in MCM |
| 177. C10H17O3O2 → C10H17O3O    | 5E-12*0.6*RO2 | RO2 = ∑ RO <sub>2</sub> in MCM |
| 178. C10H17O3O2 → C10H18O4     | 5E-12*0.2*RO2 | RO2 = ∑ RO <sub>2</sub> in MCM |
| 179. C10H17O4O2 → C10H16O5iso2 | 5E-12*0.2*RO2 | RO2 = ∑ RO <sub>2</sub> in MCM |
| 180. C10H17O4O2 → C10H17O4O    | 5E-12*0.6*RO2 | RO2 = ∑ RO <sub>2</sub> in MCM |
| 181. C10H17O4O2 → C10H18O5     | 5E-12*0.2*RO2 | RO2 = ∑ RO <sub>2</sub> in MCM |
| 182. C10H17O5O2 → C10H16O6iso2 | 8E-12*0.2*RO2 | RO2 = ∑ RO <sub>2</sub> in MCM |
| 183. C10H17O5O2 → C10H17O5O    | 8E-12*0.6*RO2 | RO2 = ∑ RO <sub>2</sub> in MCM |
| 184. C10H17O5O2 → C10H18O6     | 8E-12*0.2*RO2 | RO2 = ∑ RO <sub>2</sub> in MCM |
| 185. C10H17O6O2 → C10H16O7iso2 | 1E-11*0.3*RO2 | RO2 = ∑ RO <sub>2</sub> in MCM |
| 186. C10H17O6O2 → C10H17O6O    | 1E-11*0.4*RO2 | RO2 = ∑ RO <sub>2</sub> in MCM |
| 187. C10H17O6O2 → C10H18O7     | 1E-11*0.3*RO2 | RO2 = ∑ RO <sub>2</sub> in MCM |
| 188. C10H17O7O2 → C10H16O8iso2 | 1E-11*0.4*RO2 | RO2 = ∑ RO <sub>2</sub> in MCM |
| 189. C10H17O7O2 → C10H17O7O    | 1E-11*0.2*RO2 | RO2 = ∑ RO <sub>2</sub> in MCM |
| 190. C10H17O7O2 → C10H18O8     | 1E-11*0.4*RO2 | RO2 = ∑ RO <sub>2</sub> in MCM |
| 191. C10H17O8O2 → C10H16O9iso2 | 1E-11*0.5*RO2 | RO2 = ∑ RO <sub>2</sub> in MCM |
| 192. C10H17O8O2 → C10H18O9     | 1E-11*0.5*RO2 | RO2 = ∑ RO <sub>2</sub> in MCM |

**Supplementary Table 8.** Observed average HOM concentrations ( $\bar{O}$ ) (ppt<sub>v</sub>) and modelled average HOM concentrations ( $\bar{M}$ ) (ppt<sub>v</sub>), correlation coefficients ( $R$ ), normalized mean bias ( $NMB$ ) and the fraction of predictions within a factor of two of the observations ( $FAC2$ ) at SMEAR II May 15-24, 2013. The model results from the PRAM sensitivity tests with the default PRAM version (Supplementary Table 4), PRAM with  $k(\text{RO}_2 + \text{RO}_2) \times 2$ , PRAM with  $k(\text{RO}_2 + \text{RO}_2) \times 0.5$ , PRAM with  $E_{H\text{-shift}} = 50$  kJ, PRAM with  $E_{H\text{-shift}} = 150$  kJ and the reduced PRAM version (Supplementary Table 7) without explicit representation of individual HOM dimer species are all evaluated against the observations.

| Statistics                                          | Tot. HOM | Monomers | Dimers | HOM-NO <sub>3</sub> | HOM RO <sub>2</sub> |
|-----------------------------------------------------|----------|----------|--------|---------------------|---------------------|
| $\bar{O}$                                           | 0.54     | 0.33     | 0.09   | 0.04                | 0.08                |
| $\bar{M}$ (Default)                                 | 0.58     | 0.34     | 0.07   | 0.04                | 0.13                |
| $\bar{M}$ $k(\text{RO}_2 + \text{RO}_2) \times 2$   | 0.61     | 0.40     | 0.09   | 0.03                | 0.09                |
| $\bar{M}$ $k(\text{RO}_2 + \text{RO}_2) \times 0.5$ | 0.55     | 0.30     | 0.06   | 0.04                | 0.16                |
| $\bar{M}$ $E_{H\text{-shift}} = 50$ kJ              | 0.58     | 0.34     | 0.07   | 0.04                | 0.13                |
| $\bar{M}$ $E_{H\text{-shift}} = 150$ kJ             | 0.58     | 0.35     | 0.07   | 0.04                | 0.12                |
| $\bar{M}$ reduced PRAM                              | 0.58     | 0.34     | 0.08   | 0.04                | 0.12                |
| $R$ (Default)                                       | 0.72     | 0.72     | 0.73   | 0.70                | 0.60                |
| $R$ $k(\text{RO}_2 + \text{RO}_2) \times 2$         | 0.71     | 0.71     | 0.72   | 0.70                | 0.55                |
| $R$ $k(\text{RO}_2 + \text{RO}_2) \times 0.5$       | 0.73     | 0.70     | 0.72   | 0.69                | 0.64                |
| $R$ $E_{H\text{-shift}} = 50$ kJ                    | 0.72     | 0.72     | 0.72   | 0.68                | 0.61                |
| $R$ $E_{H\text{-shift}} = 150$ kJ                   | 0.72     | 0.71     | 0.72   | 0.72                | 0.60                |
| $R$ reduced PRAM                                    | 0.72     | 0.71     | 0.73   | 0.70                | 0.61                |
| $NMB$ (%) (Default)                                 | 8        | 3        | -16    | -11                 | 67                  |
| $NMB$ $k(\text{RO}_2 + \text{RO}_2) \times 2$       | 14       | 19       | 0.2    | -18                 | 26                  |
| $NMB$ $k(\text{RO}_2 + \text{RO}_2) \times 0.5$     | 4        | -9       | -34    | -5                  | 110                 |
| $NMB$ $E_{H\text{-shift}} = 50$ kJ                  | 8        | 2        | -14    | -11                 | 67                  |
| $NMB$ $E_{H\text{-shift}} = 150$ kJ                 | 8        | 4        | -20    | -10                 | 65                  |
| $NMB$ reduced PRAM                                  | 7        | 2        | -11    | -12                 | 62                  |
| $FAC2$ (Default)                                    | 0.93     | 0.93     | 0.55   | 0.66                | 0.61                |
| $FAC2$ $k(\text{RO}_2 + \text{RO}_2) \times 2$      | 0.92     | 0.91     | 0.67   | 0.64                | 0.76                |
| $FAC2$ $k(\text{RO}_2 + \text{RO}_2) \times 0.5$    | 0.94     | 0.90     | 0.41   | 0.68                | 0.41                |
| $FAC2$ $E_{H\text{-shift}} = 50$ kJ                 | 0.93     | 0.93     | 0.52   | 0.65                | 0.61                |
| $FAC2$ $E_{H\text{-shift}} = 150$ kJ                | 0.94     | 0.94     | 0.56   | 0.67                | 0.61                |
| $FAC2$ reduced PRAM                                 | 0.93     | 0.93     | 0.50   | 0.66                | 0.62                |

**Supplementary Table 9.** Gas-phase precursors used for the ADCHEM model simulations

| Gas-phase precursor    |                        |
|------------------------|------------------------|
| $\alpha$ -pinene       | $\beta$ -pinene        |
| Limonene               | Carene                 |
| Isoprene               | Ethane                 |
| Butane                 | Etene                  |
| Propene                | <i>o</i> -xylene       |
| Formaldehyde           | Acetaldehyde           |
| Methyl Ethyl Ketone    | Glyoxal                |
| Methylglyoxal          | 1-petene               |
| 2-methylpropene        | Dodecane               |
| Benzene                | Decane                 |
| Ethylbenzene           | Nonane                 |
| <i>p</i> -xylene       | Toluene                |
| Undecane               | <i>m</i> -xylene       |
| 1-butene               | 1,2,4-trimethylbenzene |
| 1,3,5-trimethylbenzene | 1,2,3-trimethylbenzene |
| $\beta$ -caryophyllene |                        |



## Supplementary References

1. Roldin, P. Peroxy Radical Autoxidation Mechanism (PRAM). PANGAEA, <https://doi.org/10.1594/PANGAEA.905102> (2019).
2. Ehn, M., et al. A large source of low-volatility secondary organic aerosol. *Nature* **506**, 476–479 (2014).
3. Jokinen, T., et al. Production of extremely low volatile organic compounds from biogenic emissions: Measured yields and atmospheric implications. *Proc. Natl. Acad. Sci. USA* **112**, 7123–7128 (2015).
4. Berndt, T., et al. Hydroxyl radical-induced formation of highly oxidized organic compounds. *Nature Communications* **7** (2016).
5. Pankow, J. F., & Asher, W. E. Simpol.1: a simple group contribution method for predicting vapor pressures and enthalpies of vaporization of multifunctional organic compounds. *Atmospheric Chemistry and Physics* **8**, 2773–2796 (2008).
6. Jenkin, M. E., Saunders, S. M., & Pilling, M. J. The tropospheric degradation of volatile organic compounds: a protocol for mechanism development. *Atmospheric Environment* **31**, 81–104 (1997).
7. Zuend, A., et al. New and extended parameterization of the thermodynamic model AIOMFAC: calculation of activity coefficients for organic-inorganic mixtures containing carboxyl, hydroxyl, carbonyl, ether, ester, alkenyl, alkyl, and aromatic functional groups, *Atmos. Chem. Phys.*, **11**, 9155–9206 (2011).
8. Eckert, F., Klamt, A. COSMOTherm, Version C3.0, Release 17.05; *COSMOlogic GmbH & Co. KG*: Leverkusen, Germany (2014).
9. Klamt, A. The COSMO and COSMO-RS solvation models. *Wiley Interdisciplinary Reviews: Computational Molecular Science*, **1**, 699-709 (2011).
10. Tomasi, J., Mennucci, B., & Cammi, R. Quantum Mechanical Continuum Solvation Models. *Chemical Reviews*, **105**, 2999-3094 (2005).
11. Wavefunction, Inc: Spartan '14 version 1.1.9, Irvine, CA.
